# Supplementary material for: Biophysical Interactions Underpin the Emergence of Information in the Genetic Code
Source: Preprints.org preprint supplement (doi:10.20944/preprints202304.0160.v1), 2023-04-10
Supplement: Supplementary file 1 [file supplementary]

## Sheet: S30 Arginine
1:1										1:10										1:25										1:50										1:100
AMP - Arg
Sample 1	AMP - Arg	1:1	0.1 mM AMP	0.1 mM Arg	23.01.2023					Sample 2	AMP - Arg	1:10	0.1 mM AMP	1 mM Arg	29.11.2022					Sample 3	AMP - Arg	1:25	0.1 mM AMP	2.5 mM Arg	29.11.2022					Sample 4	AMP - Arg	1:50	0.1 mM AMP	5 mM Arg	29.11.2022					Sample 5	AMP - Arg	1:100	0.1 mM AMP	10 mM Arg	29.11.2022
Peak	Region	Index (F1)	ν(F1) [ppm]	ν(F1) [Hz]	Intensity [abs]	Intensity [rel]	Half width [ppm]	Half width [Hz]	Annotation	Peak	Region	Index (F1)	ν(F1) [ppm]	ν(F1) [Hz]	Intensity [abs]	Intensity [rel]	Half width [ppm]	Half width [Hz]	Annotation	Peak	Region	Index (F1)	ν(F1) [ppm]	ν(F1) [Hz]	Intensity [abs]	Intensity [rel]	Half width [ppm]	Half width [Hz]	Annotation	Peak	Region	Index (F1)	ν(F1) [ppm]	ν(F1) [Hz]	Intensity [abs]	Intensity [rel]	Half width [ppm]	Half width [Hz]	Annotation	Peak	Region	Index (F1)	ν(F1) [ppm]	ν(F1) [Hz]	Intensity [abs]	Intensity [rel]	Half width [ppm]	Half width [Hz]	Annotation
21	8	52262.7	-0.0001	-0.0756	504896	7.36	0.0064	3.8147	DSS	26	8	52262.3	-0.0001	-0.0732	353712	15	0.0095	5.722	DSS	38	9	52265.4	-0.0001	-0.072	497989	6.2	0.0049	2.9344	DSS	40	9	52258.6	-0.0001	-0.0732	492308	1.39	0.0046	2.7877	DSS	26	8	52263.2	-0.0001	-0.0708	301418	0.44	0.0078	4.695	DSS
20	7	45206.5	1.7256	1035.21	16417	0.24	0.0135	8.0696	Arg	25	6	45542.7	1.6432	985.816	58329.7	2.47	0.0064	3.8147	Arg	37	8	45631.4	1.6223	973.255	137096	1.71	0.0078	4.695	Arg	39	8	45624.7	1.6223	973.255	528721	1.49	0.0066	3.9614	Arg	25	7	45622.2	1.624	974.284	1.31766e+06	1.94	0.0103	6.1622	Arg
19	7	45151	1.7391	1043.34	22011.8	0.32	0.0132	7.9228	Arg	24	6	45519	1.6491	989.302	60467.1	2.56	0.0115	6.8958	Arg	36	8	45612.1	1.627	976.085	146897	1.83	0.0046	2.7877	Arg	38	8	45604.6	1.6272	976.201	562002	1.58	0.0046	2.7877	Arg	24	7	45579.9	1.6344	980.492	1.69691e+06	2.5	0.0112	6.7491	Arg
18	7	45090.6	1.7539	1052.22	30598.3	0.45	0.0105	6.3089	Arg	23	6	45469.9	1.661	996.497	48223.8	2.05	0.0125	7.4827	Arg	35	8	45589.2	1.6326	979.455	184069	2.29	0.0068	4.1081	Arg	37	8	45582	1.6327	979.515	721223	2.03	0.0068	4.1081	Arg	23	7	45554.2	1.6407	984.273	1.93652e+06	2.86	0.0071	4.2549	Arg
17	7	45033.6	1.7678	1060.57	20265.8	0.3	0.0164	9.8302	Arg	22	6	45350.5	1.6903	1014.02	46163.7	1.96	0.0122	7.336	Arg	34	8	45563.5	1.6389	983.224	198696	2.47	0.0056	3.3745	Arg	36	8	45555.9	1.6391	983.343	786073	2.21	0.0054	3.2278	Arg	22	7	45514.1	1.6505	990.152	1.99602e+06	2.94	0.0125	7.4827	Arg
16	7	44975.1	1.7822	1069.16	10801.2	0.16	0.0095	5.722	Arg	21	6	45301.3	1.7023	1021.25	71619.7	3.04	0.0127	7.6294	Arg	33	8	45545.2	1.6434	985.901	200779	2.5	0.0054	3.2278	Arg	35	8	45537.5	1.6436	986.039	789143	2.22	0.0056	3.3745	Arg	21	7	45467.8	1.6618	996.95	1.72754e+06	2.55	0.0125	7.4827	Arg
15	7	44547.6	1.8867	1131.88	12417.4	0.18	0.0149	8.9499	Arg	20	6	45279.1	1.7077	1024.49	67594.2	2.87	0.0044	2.6409	Arg	32	8	45517.4	1.6502	989.98	227338	2.83	0.0105	6.3089	Arg	34	8	45509.8	1.6504	990.108	919051	2.59	0.0105	6.3089	Arg	20	7	45365.8	1.6867	1011.91	1.5494e+06	2.29	0.0115	6.8958	Arg
14	7	44499.6	1.8984	1138.91	10996	0.16	0.0149	8.9499	Arg	19	6	45251.6	1.7145	1028.53	77081	3.27	0.0071	4.2549	Arg	31	8	45471.1	1.6615	996.783	199470	2.48	0.01	6.0155	Arg	33	8	45463.5	1.6617	996.901	808109	2.27	0.0086	5.1352	Arg	19	7	45313.4	1.6995	1019.59	2.15379e+06	3.18	0.0169	10.1236	Arg
13	6	39094	3.2205	1932.02	13437.6	0.2	0.0093	5.5753	Arg	18	6	45210.8	1.7244	1034.52	75101	3.18	0.0108	6.4556	Arg	30	8	45370.1	1.6862	1011.6	176448	2.2	0.011	6.6024	Arg	32	8	45413.9	1.6738	1004.17	527829	1.49	0.0105	6.3089	Arg	18	7	45254.5	1.714	1028.25	2.21921e+06	3.27	0.012	7.1892	Arg
12	6	39045.9	3.2322	1939.08	25207.7	0.37	0.0071	4.2549	Arg	17	6	45158.3	1.7373	1042.23	70105.3	2.97	0.0169	10.1236	Arg	29	8	45322.1	1.698	1018.64	225400	2.81	0.0071	4.2549	Arg	31	8	45363.2	1.6862	1011.61	692723	1.95	0.0093	5.5753	Arg	17	7	45215.6	1.7235	1033.94	1.77459e+06	2.62	0.0112	6.7491	Arg
11	6	38997.7	3.244	1946.15	12326.7	0.18	0.0078	4.695	Arg	16	6	45093.1	1.7532	1051.79	54899.9	2.33	0.0142	8.5097	Arg	28	8	45302	1.7029	1021.59	255859	3.19	0.0073	4.4016	Arg	30	8	45315.5	1.6979	1018.62	882744	2.48	0.0071	4.2549	Arg	16	7	44603.4	1.8732	1123.77	3.48938e+06	5.15	0.0093	5.5753	Arg
10	5	36974.3	3.7389	2243.02	6184.72	0.09	0.009	5.4286	Arg	15	6	44544.7	1.8873	1132.25	175990	7.46	0.0161	9.6835	Arg	27	8	45255.3	1.7143	1028.45	286874	3.57	0.0122	7.336	Arg	29	8	45294.7	1.703	1021.67	939208	2.64	0.0066	3.9614	Arg	15	7	44556.8	1.8846	1130.61	5.57631e+06	8.23	0.0159	9.5367	Arg
9	5	36929	3.75	2249.67	9425.78	0.14	0.0068	4.1081	Arg	14	6	44497.2	1.8989	1139.21	181978	7.72	0.013	7.7761	Arg	26	8	45211.9	1.7249	1034.8	253300	3.15	0.0117	7.0425	Arg	28	8	45266.1	1.71	1025.87	775633	2.18	0.0039	2.3475	Arg	14	7	44500.4	1.8984	1138.87	4.85539e+06	7.16	0.0159	9.5367	Arg
8	5	36886.5	3.7603	2255.9	6109.48	0.09	0.0086	5.1352	Arg	13	6	44453.8	1.9096	1145.58	136324	5.78	0.0174	10.4171	Arg	25	8	45165.8	1.7362	1041.57	220005	2.74	0.0152	9.0966	Arg	27	8	45248.5	1.7143	1028.44	1.02808e+06	2.89	0.0083	4.9885	Arg	13	6	39093.4	3.2207	1932.18	5.49073e+06	8.1	0.0098	5.8688	Arg
7	4	35904.7	4.0005	2399.96	167548	2.44	0.0166	9.9769	R5	12	5	39091.6	3.221	1932.32	140790	5.97	0.0108	6.4556	Arg	24	8	45096.2	1.7532	1051.79	145424	1.81	0.012	7.1892	Arg	26	8	45204.7	1.725	1034.87	800784	2.25	0.0112	6.7491	Arg	12	6	39044.9	3.2326	1939.3	10164807	15	0.0081	4.8417	Arg
6	3	34465.4	4.3525	2611.12	25315.1	0.37	0.0152	9.0966	R4	11	5	39043.7	3.2327	1939.34	256704	10.89	0.0108	6.4556	Arg	23	8	44662.1	1.8594	1115.48	145523	1.81	0.0098	5.8688	Arg	25	8	45158.2	1.7364	1041.69	593801	1.67	0.01	6.0155	Arg	11	6	38996.3	3.2445	1946.44	5.35478e+06	7.9	0.0095	5.722	Arg
5	3	33864.9	4.4993	2699.24	6248.08	0.09	0.012	7.1892	R2	10	5	38996.3	3.2443	1946.3	136980	5.81	0.0103	6.1622	Arg	22	8	44607.3	1.8728	1123.52	377246	4.69	0.0078	4.695	Arg	24	8	44656.2	1.8592	1115.35	484826	1.37	0.0105	6.3089	Arg	10	5	36974.3	3.739	2243.11	2.46192e+06	3.63	0.0083	4.9885	Arg
4	2	27237.3	6.1202	3671.64	48125.5	0.7	0.0086	5.1352	R1	9	4	36926.2	3.7505	2250.03	126692	5.37	0.0157	9.39	Arg	21	8	44550	1.8868	1131.92	614388	7.65	0.0125	7.4827	Arg	23	8	44601.6	1.8725	1123.36	1443787	4.06	0.0071	4.2549	Arg	9	5	36931.2	3.7496	2249.43	4.53372e+06	6.69	0.0068	4.1081	Arg
3	2	27197.5	6.1299	3677.47	46235.3	0.67	0.0081	4.8417	R1	8	4	36886.6	3.7602	2255.84	97691.9	4.14	0.0098	5.8688	Arg	20	8	44502.6	1.8984	1138.87	676158	8.41	0.012	7.1892	Arg	22	8	44587.8	1.8759	1125.38	1.37432e+06	3.87	0.0039	2.3475	Arg	8	5	36888.2	3.7601	2255.74	2.47656e+06	3.65	0.0083	4.9885	Arg
2	1	18506.3	8.2555	4952.63	73841.1	1.08	0.0064	3.8147	AMP2	7	4	35904.8	4.0003	2399.88	153460	6.51	0.0171	10.2703	R5	19	8	44478.5	1.9043	1142.42	475289	5.91	0.0037	2.2008	Arg	21	8	44556.9	1.8834	1129.91	2.20945e+06	6.22	0.0059	3.5213	Arg	7	4	35912.3	3.9987	2398.92	142668	0.21	0.0166	9.9769	R5
1	1	17111	8.5967	5157.35	104160	1.52	0.0061	3.668	AMP8	6	3	34461.5	4.3533	2611.64	24494.6	1.04	0.0157	9.39	R4	18	8	44458.6	1.9091	1145.33	477543	5.94	0.0139	8.363	Arg	20	8	44542.1	1.8871	1132.08	2.3981e+06	6.75	0.0066	3.9614	Arg	6	3	34475.5	4.3501	2609.73	23354.8	0.03	0.0154	9.2433	R4
										5	3	33866.6	4.4988	2698.93	5144.27	0.22	0.0137	8.2163	R2	17	8	44404.1	1.9225	1153.32	254237	3.16	0.0095	5.722	Arg	19	8	44513.2	1.8941	1136.32	1.82858e+06	5.15	0.0044	2.6409	Arg	5	3	33863	4.4999	2699.59	2291.53	0	0.0046	2.7877	R2
										4	2	27221.1	6.1241	3673.95	36725.2	1.56	0.0044	2.6409	R1	16	7	39875.4	3.03	1817.78	314398	3.91	0.0061	3.668	Arg	18	8	44495	1.8986	1139	2.23541e+06	6.3	0.0068	4.1081	Arg	4	2	27240	6.1197	3671.31	37952.5	0.06	0.009	5.4286	R1
										3	2	27200.1	6.1292	3677.03	37160.1	1.58	0.0093	5.5753	R1	15	7	39822.3	3.043	1825.57	541355	6.74	0.0054	3.2278	Arg	17	8	44472.6	1.9041	1142.29	1.49155e+06	4.2	0.0059	3.5213	Arg	3	2	27202	6.129	3676.88	36547.6	0.05	0.009	5.4286	R1
										2	1	18503.6	8.2561	4952.98	48632.9	2.06	0.0095	5.722	AMP2	14	7	39768.7	3.0561	1833.43	262168	3.26	0.0056	3.3745	Arg	16	8	44449.1	1.9098	1145.74	1.00531e+06	2.83	0.01	6.0155	Arg	2	1	18504.8	8.256	4952.93	49243.8	0.07	0.0076	4.5483	AMP2
										1	1	17110.8	8.5967	5157.33	73902.7	3.13	0.0095	5.722	AMP8	13	7	39096.8	3.2204	1932	630232	7.85	0.0068	4.1081	Arg	15	7	39866.9	3.0305	1818.04	250228	0.71	0.0054	3.2278	Arg	1	1	17111.5	8.5967	5157.35	70988.5	0.1	0.0088	5.2819	AMP8
																				12	7	39048.3	3.2323	1939.12	1.20542e+06	15	0.0059	3.5213	Arg	14	7	39813.7	3.0435	1825.83	436000	1.23	0.0046	2.7877	Arg
																				11	7	38999.9	3.2442	1946.23	625596	7.79	0.0064	3.8147	Arg	13	7	39760.1	3.0566	1833.7	210020	0.59	0.0049	2.9344	Arg
																				10	6	36977	3.7389	2243.02	290230	3.61	0.0071	4.2549	Arg	12	6	36969.7	3.739	2243.1	1183649	3.33	0.0054	3.2278	Arg
																				9	6	36934.4	3.7493	2249.28	518301	6.45	0.0086	5.1352	Arg	11	6	36926.7	3.7495	2249.41	2.24553e+06	6.32	0.0046	2.7877	Arg
																				8	6	36892.7	3.7595	2255.39	311232	3.87	0.0088	5.2819	Arg	10	6	36883.8	3.76	2255.71	1.20635e+06	3.4	0.0056	3.3745	Arg
																				7	5	35912.8	3.9991	2399.17	155192	1.93	0.0095	5.722	R5	9	5	35930.5	3.9932	2395.58	125997	0.35	0.0051	3.0811	R5
																				6	4	34469.9	4.352	2610.86	23410.4	0.29	0.0144	8.6564	R4	8	5	35906.3	3.9991	2399.13	175446	0.49	0.0088	5.2819	R5
																				5	4	33871	4.4985	2698.74	3432.92	0.04	0.0088	5.2819	R2	7	5	35880.5	4.0054	2402.91	117492	0.33	0.0046	2.7877	R5
																				4	3	27240.2	6.1201	3671.6	46543.4	0.58	0.0061	3.668	R1	6	4	34463.7	4.3519	2610.78	26732.3	0.08	0.0157	9.39	R4
																				3	3	27200	6.13	3677.5	45740.6	0.57	0.0061	3.668	R1	5	3	33854.6	4.5008	2700.15	5931.69	0.02	0.0108	6.4556	R2
																				2	2	18508.4	8.2556	4952.73	64756.4	0.81	0.0049	2.9344	AMP2	4	2	27234.7	6.1198	3671.41	54192.6	0.15	0.0056	3.3745	R1
																				1	2	17110.1	8.5976	5157.89	98340.2	1.22	0.0054	3.2278	AMP8	3	2	27194.6	6.1297	3677.3	53493.4	0.15	0.0056	3.3745	R1
																														2	1	18500.9	8.2558	4952.83	74488.5	0.21	0.0046	2.7877	AMP2
																														1	1	17106	8.597	5157.49	108679	0.31	0.0054	3.2278	AMP8
CMP - Arg
Sample 6	CMP - Arg	1:1								Sample 7	CMP - Arg	1:10	0.1 mM CMP	1 mM Arg	29.11.2022					Sample 4	CMP - Arg	1:25	0.1 mM CMP	2.5 mM Arg	23.01.2023					Sample 9	CMP - Arg	1:50	0.1 mM CMP	5 mM Arg	29.11.2022					Sample 10	CMP - Arg	1:100	0.1 mM CMP	10 mM Arg	29.11.2022
Peak	Region	Index (F1)	ν(F1) [ppm]	ν(F1) [Hz]	Intensity [abs]	Intensity [rel]	Half width [ppm]	Half width [Hz]	Annotation	Peak	Region	Index (F1)	ν(F1) [ppm]	ν(F1) [Hz]	Intensity [abs]	Intensity [rel]	Half width [ppm]	Half width [Hz]	Annotation	Peak	Region	Index (F1)	ν(F1) [ppm]	ν(F1) [Hz]	Intensity [abs]	Intensity [rel]	Half width [ppm]	Half width [Hz]	Annotation	Peak	Region	Index (F1)	ν(F1) [ppm]	ν(F1) [Hz]	Intensity [abs]	Intensity [rel]	Half width [ppm]	Half width [Hz]	Annotation	Peak	Region	Index (F1)	ν(F1) [ppm]	ν(F1) [Hz]	Intensity [abs]	Intensity [rel]	Half width [ppm]	Half width [Hz]	Annotation
										24	5	52263.4	-0.0001	-0.0756	324220	5.03	0.01	6.0155	DSS	30	8	52267.7	-0.0001	-0.0726	428260	3.51	0.0068	4.1081	DSS	30	6	52262.5	-0.0001	-0.072	355808	1.53	0.0086	5.1352	DSS	23	7	52269.7	-0.0001	-0.0708	256953	0.53	0.0103	6.1622	DSS
										23	4	45520.6	1.6489	989.231	66847.7	1.04	0.0117	7.0425	Arg	29	7	45589.9	1.633	979.687	290882	2.38	0.0164	9.8302	Arg	29	5	45545.1	1.6427	985.503	734119	3.15	0.0257	15.4055	Arg	22	6	45550.4	1.6432	985.772	1.65653e+06	3.44	0.0249	14.9654	Arg
										22	4	45472.5	1.6607	996.28	55558.8	0.86	0.0127	7.6294	Arg	28	7	45551.1	1.6425	985.384	331405	2.71	0.0108	6.4556	Arg	28	5	45517.4	1.6495	989.567	755767	3.24	0.0117	7.0425	Arg	21	6	45527.2	1.6489	989.18	1.72904e+06	3.6	0.0122	7.336	Arg
										21	4	45301.6	1.7025	1021.36	76839.5	1.19	0.0137	8.2163	Arg	27	7	45520.1	1.6501	989.936	356246	2.92	0.0108	6.4556	Arg	27	5	45468	1.6616	996.819	633259	2.72	0.0122	7.336	Arg	20	6	45477.5	1.661	996.468	1.42875e+06	2.97	0.013	7.7761	Arg
										20	4	45253.7	1.7142	1028.38	84410.4	1.31	0.0115	6.8958	Arg	26	7	45472.9	1.6617	996.858	305854	2.5	0.0122	7.336	Arg	26	5	45415.2	1.6745	1004.56	444798	1.91	0.0108	6.4556	Arg	19	6	45360.9	1.6895	1013.59	1.27548e+06	2.65	0.012	7.1892	Arg
										19	4	45214.6	1.7238	1034.12	82809.5	1.29	0.0112	6.7491	Arg	25	7	45421.9	1.6741	1004.34	210019	1.72	0.0108	6.4556	Arg	25	5	45362.2	1.6875	1012.34	569774	2.45	0.012	7.1892	Arg	18	6	45309.8	1.702	1021.09	1.85063e+06	3.85	0.0171	10.2703	Arg
										18	4	45160.5	1.737	1042.06	75562.4	1.17	0.0171	10.2703	Arg	24	7	45370.8	1.6866	1011.83	269122	2.2	0.012	7.1892	Arg	24	5	45303.6	1.7018	1020.94	830342	3.56	0.0166	9.9769	Arg	17	6	45262.1	1.7137	1028.07	1.88262e+06	3.92	0.0135	8.0696	Arg
										17	4	45095.4	1.7529	1051.61	60608.9	0.94	0.0152	9.0966	Arg	23	7	45306.6	1.7023	1021.25	381601	3.12	0.0157	9.39	Arg	23	5	45254.6	1.7138	1028.12	858975	3.69	0.0122	7.336	Arg	16	6	44553.9	1.8869	1131.98	4.62144e+06	9.61	0.0235	14.085	Arg
										16	4	44546.2	1.8872	1132.18	186956	2.9	0.0225	13.4982	Arg	22	7	45259.1	1.7139	1028.22	408209	3.34	0.0125	7.4827	Arg	22	5	45210.9	1.7244	1034.53	709643	3.05	0.011	6.6024	Arg	15	6	44508.3	1.898	1138.67	4.10301e+06	8.53	0.0164	9.8302	Arg
										15	4	44498.8	1.8988	1139.15	194619	3.02	0.0257	15.4055	Arg	21	7	45216.2	1.7244	1034.52	340120	2.78	0.0115	6.8958	Arg	21	5	45163.5	1.7361	1041.49	516173	2.21	0.0198	11.8842	Arg	14	5	39096.4	3.2216	1932.71	4.01499e+06	8.35	0.0105	6.3089	Arg
										14	3	39092.3	3.2211	1932.38	144578	2.24	0.01	6.0155	Arg	20	7	45168.7	1.736	1041.48	254466	2.08	0.0137	8.2163	Arg	20	5	44594.9	1.8751	1124.91	1.31476e+06	5.64	0.0103	6.1622	Arg	13	5	39049.5	3.2331	1939.58	7.21372e+06	15	0.0147	8.8031	Arg
										13	3	39045.3	3.2326	1939.28	264895	4.11	0.0139	8.363	Arg	19	7	44602.5	1.8745	1124.57	596769	4.88	0.0105	6.3089	Arg	19	5	44549.4	1.8862	1131.59	2.12336e+06	9.11	0.0159	9.5367	Arg	12	5	39003.1	3.2444	1946.39	4.12943e+06	8.59	0.0103	6.1622	Arg
										12	3	38999.7	3.2437	1945.97	155320	2.41	0.0103	6.1622	Arg	18	7	44555.2	1.8861	1131.51	988000	8.09	0.0142	8.5097	Arg	18	5	44501.4	1.898	1138.64	1.91872e+06	8.23	0.0186	11.1507	Arg	11	4	36933.5	3.7506	2250.04	3.00145e+06	6.24	0.0137	8.2163	Arg
										11	2	36928.5	3.7503	2249.85	134070	2.08	0.0186	11.1507	Arg	17	7	44506.9	1.8979	1138.59	911830	7.46	0.0193	11.5908	Arg	17	4	39091.4	3.2211	1932.38	1.9165e+06	8.22	0.0103	6.1622	Arg	10	3	36004.8	3.9777	2386.31	41533.6	0.09	0.0225	13.4982	R5
										10	2	35994.1	3.9788	2386.95	43870.8	0.68	0.0223	13.3514	Arg	16	6	39098.6	3.2206	1932.09	983895	8.05	0.0093	5.5753	Arg	16	4	39043.4	3.2328	1939.42	3.49556e+06	15	0.0093	5.5753	Arg	9	3	35768.3	4.0355	2421	45295	0.09	0.0183	11.0039	R5
										9	2	35760.8	4.0358	2421.18	48997.5	0.76	0.0166	9.9769	R5	15	6	39050.2	3.2324	1939.19	1.83191e+06	15	0.0076	4.5483	Arg	15	4	38995.6	3.2445	1946.44	1.88301e+06	8.08	0.0098	5.8688	Arg	8	3	35691.2	4.0544	2432.32	24567.9	0.05	0.0154	9.2433	R5
										8	2	35682.5	4.055	2432.66	26737.9	0.42	0.0149	8.9499	R5	14	6	39001.8	3.2442	1946.28	968439	7.93	0.009	5.4286	Arg	14	3	36973	3.7392	2243.2	877464	3.77	0.0086	5.1352	Arg	7	3	34971.1	4.2305	2537.97	36198.7	0.08	0.0208	12.4711	R4
										7	2	34961.6	4.2313	2538.43	38567.5	0.6	0.0176	10.5638	R4	13	5	36982.2	3.7382	2242.61	423259	3.47	0.0086	5.1352	Arg	13	3	36930.4	3.7496	2249.44	1.58662e+06	6.81	0.0088	5.2819	Arg	6	3	34552.7	4.3328	2599.35	53582.1	0.11	0.0159	9.5367	R2/3
										6	2	34539.1	4.3346	2600.43	60021.3	0.93	0.0144	8.6564	R2/3	12	5	36939.3	3.7487	2248.89	758997	6.21	0.0083	4.9885	Arg	12	3	36888.8	3.7597	2255.55	914934	3.93	0.0088	5.2819	Arg	5	2	27767.7	5.9922	3594.85	33559.1	0.07	0.0142	8.5097	R1
										5	1	27755	5.9938	3595.78	38330.8	0.6	0.0142	8.5097	R1	11	5	36897.2	3.759	2255.08	432299	3.54	0.0086	5.1352	Arg	11	2	36074.6	3.9589	2375.01	27560.2	0.12	0.013	7.7761	R5	4	2	27240.2	6.1212	3672.23	29196.1	0.06	0.0125	7.4827	CMP5
										4	1	27231.1	6.1219	3672.65	33060.3	0.51	0.0112	6.7491	CMP5	10	4	36004.1	3.9774	2386.11	22714.8	0.19	0.0205	12.3244	R5	10	2	35996.7	3.9779	2386.43	45009.3	0.19	0.0213	12.7646	R5	3	2	27185.2	6.1347	3680.31	26315.5	0.05	0.0125	7.4827	CMP5
										3	1	27176.1	6.1353	3680.72	29041.7	0.45	0.0125	7.4827	CMP5	9	4	35772.1	4.0341	2420.15	26802.2	0.22	0.0139	8.363	R5	9	2	35765.1	4.0346	2420.41	52302.8	0.22	0.0152	9.0966	R5	2	1	19211	8.0849	4850.28	35207.6	0.07	0.012	7.1892	CMP6
										2	1	19193.1	8.0877	4851.98	41546.9	0.65	0.0108	6.4556	CMP6	8	4	35693.4	4.0534	2431.7	13250.9	0.11	0.0152	9.0966	R5	8	2	35686.7	4.0537	2431.91	26388.1	0.11	0.0159	9.5367	R5	1	1	19157	8.0981	4858.2	36883.8	0.08	0.0112	6.7491	CMP6
										1	1	19139	8.1009	4859.91	42965.6	0.67	0.0108	6.4556	CMP6	7	4	34969.9	4.2303	2537.85	19700.7	0.16	0.0152	9.0966	R4	7	2	34963.9	4.2305	2537.97	41412.9	0.18	0.0171	10.2703	R4
																				6	4	34552.4	4.3324	2599.09	29979.1	0.25	0.0122	7.336	R2/3	6	2	34541.3	4.3339	2599.97	63214.8	0.27	0.0139	8.363	R2/3
																				5	3	27767.1	5.9919	3594.63	20811.1	0.17	0.0125	7.4827	R1	5	1	27757.2	5.993	3595.33	39138.6	0.17	0.013	7.7761	R1
																				4	3	27233.2	6.1224	3672.96	22272.5	0.18	0.0071	4.2549	CMP5	4	1	27230.3	6.1219	3672.64	37027.9	0.16	0.0093	5.5753	CMP5
																				3	3	27178.8	6.1357	3680.95	20486.5	0.17	0.0071	4.2549	CMP5	3	1	27174.9	6.1354	3680.77	33124	0.14	0.0095	5.722	CMP5
																				2	1	19192.9	8.0888	4852.64	28164.5	0.23	0.0071	4.2549	CMP6	2	1	19194.8	8.0871	4851.59	43420.6	0.19	0.0098	5.8688	CMP6
																				1	1	19139.5	8.1019	4860.47	28295.3	0.23	0.0066	3.9614	CMP6	1	1	19140.5	8.1004	4859.56	44706.2	0.19	0.0098	5.8688	CMP6


Arg - GMP
										Sample 19	GMP - Arg	1:10	0.1 mM GMP	1 mM Arg	11.10.2022					Sample 20	GMP - Arg	1:25	0.1 mM GMP	2.5 mM Arg	11.10.2022					Sample 21	GMP - Arg	1:50	0.1 mM GMP	5 mM Arg	11.10.2022					Sample 7	GMP - Arg	1:100	0.1 mM GMP	10 mM Arg	23.01.2023
										Peak	Region	Index (F1)	ν(F1) [ppm]	ν(F1) [Hz]	Intensity [abs]	Intensity [rel]	Half width [ppm]	Half width [Hz]	Annotation	Peak	Region	Index (F1)	ν(F1) [ppm]	ν(F1) [Hz]	Intensity [abs]	Intensity [rel]	Half width [ppm]	Half width [Hz]	Annotation	Peak	Region	Index (F1)	ν(F1) [ppm]	ν(F1) [Hz]	Intensity [abs]	Intensity [rel]	Half width [ppm]	Half width [Hz]	Annotation	Peak	Region	Index (F1)	ν(F1) [ppm]	ν(F1) [Hz]	Intensity [abs]	Intensity [rel]	Half width [ppm]	Half width [Hz]	Annotation
										28	9	52255.1	-0.0001	-0.0738	524761	9.4	0.0056	3.3745	DSS	26	8	52258.6	-0.0001	-0.072	439223	2.17	0.0076	4.5483	DSS	26	8	52258.9	-0.0001	-0.0714	436024	1.13	0.0073	4.4016	DSS	26	8	52264	-0.0001	-0.072	359093	0.55	0.0083	4.9885	DSS
										27	8	45578.2	1.6328	979.553	115169	2.06	0.012	7.1892	Arg C4	25	7	45581	1.633	979.657	483991	2.4	0.0157	9.39	Arg C4	25	7	45579.6	1.6334	979.922	908952	2.35	0.0159	9.5367	Arg C4	25	7	45667	1.6133	967.824	747796	1.14	0.0098	5.8688	Arg
										26	8	45535.6	1.6432	985.803	130252	2.33	0.0059	3.5213	Arg C4	24	7	45539.6	1.6431	985.733	560060	2.77	0.0112	6.7491	Arg C4	24	7	45543.3	1.6423	985.25	1.05729e+06	2.74	0.0108	6.4556	Arg C4	24	7	45547.2	1.6426	985.403	1.97848e+06	3.01	0.0252	15.1121	Arg
										25	8	45506.7	1.6503	990.054	146626	2.63	0.0105	6.3089	Arg C4	23	7	45511.1	1.6501	989.915	594618	2.94	0.0112	6.7491	Arg C4	23	7	45510.6	1.6503	990.037	1.1019e+06	2.85	0.0112	6.7491	Arg C4	23	7	45519	1.6495	989.543	2.04685e+06	3.11	0.0117	7.0425	Arg
										24	8	45459.9	1.6618	996.921	129020	2.31	0.0098	5.8688	Arg C4	22	7	45463.1	1.6618	996.961	501533	2.48	0.0122	7.336	Arg C4	22	7	45462.8	1.662	997.054	944330	2.44	0.0122	7.336	Arg C4	22	7	45469.2	1.6616	996.849	1.71793e+06	2.61	0.0122	7.336	Arg
										23	8	45409.9	1.674	1004.24	85198.9	1.53	0.011	6.6024	Arg C4	21	7	45411.9	1.6744	1004.48	339232	1.68	0.0108	6.4556	Arg C4	21	7	45411.1	1.6746	1004.64	644620	1.67	0.011	6.6024	Arg C4	21	7	45417	1.6744	1004.52	1.18898e+06	1.81	0.0108	6.4556	Arg
										22	8	45358.9	1.6865	1011.74	112448	2.01	0.0117	7.0425	Arg C4	20	7	45359.8	1.6871	1012.11	441974	2.19	0.0122	7.336	Arg C4	20	7	45360.5	1.687	1012.07	843302	2.18	0.012	7.1892	Arg C4	20	7	45363.5	1.6875	1012.36	1.52328e+06	2.32	0.0122	7.336	Arg
										21	8	45292	1.7028	1021.55	159022	2.85	0.0081	4.8417	Arg C4	19	7	45296.9	1.7025	1021.35	637141	3.15	0.0154	9.2433	Arg C4	19	7	45300.8	1.7016	1020.83	1.19175e+06	3.08	0.0161	9.6835	Arg C4	19	7	45305.3	1.7017	1020.9	2.22524e+06	3.38	0.0166	9.9769	Arg
										20	8	45244.8	1.7144	1028.48	175666	3.15	0.0122	7.336	Arg C4	18	7	45248.6	1.7143	1028.43	656871	3.25	0.013	7.7761	Arg C4	18	7	45250.1	1.714	1028.26	1.23383e+06	3.19	0.0125	7.4827	Arg C4	18	7	45256.5	1.7137	1028.07	2.27097e+06	3.45	0.012	7.1892	Arg
										19	8	45202.1	1.7248	1034.74	152077	2.72	0.0112	6.7491	Arg C4	17	7	45205.4	1.7248	1034.77	512928	2.54	0.0112	6.7491	Arg C4	17	7	45206.5	1.7247	1034.65	976845	2.53	0.0112	6.7491	Arg C4	17	7	45212.5	1.7244	1034.52	1.79188e+06	2.72	0.0112	6.7491	Arg
										18	8	45154.5	1.7364	1041.73	123843	2.22	0.0144	8.6564	Arg C4	16	7	45157.6	1.7365	1041.78	351955	1.74	0.0108	6.4556	Arg C4	16	7	45158.6	1.7364	1041.69	673956	1.74	0.0105	6.3089	Arg C4	16	7	45165.2	1.736	1041.46	1.20834e+06	1.84	0.011	6.6024	Arg
										17	8	45085.6	1.7533	1051.83	76084.3	1.36	0.0135	8.0696	Arg C4	15	7	44589.8	1.8754	1125.09	1.02967e+06	5.1	0.0105	6.3089	Arg C3	15	7	44592.3	1.8749	1124.77	2.0536e+06	5.32	0.0105	6.3089	Arg C3	15	7	44595.3	1.8754	1125.07	3.46064e+06	5.26	0.01	6.0155	Arg
										16	8	44648.5	1.8602	1115.96	81469.7	1.46	0.01	6.0155	Arg C3	14	7	44541.2	1.8873	1132.22	1.66986e+06	8.27	0.0154	9.2433	Arg C3	14	7	44543.7	1.8868	1131.9	3.21271e+06	8.32	0.0154	9.2433	Arg C3	14	7	44550	1.8864	1131.71	5.68477e+06	8.64	0.0164	9.8302	Arg
										15	8	44593.3	1.8737	1124.06	270039	4.84	0.0108	6.4556	Arg C3	13	7	44492.5	1.8992	1139.36	1.38775e+06	6.87	0.0142	8.5097	Arg C3	13	7	44494.8	1.8987	1139.08	2.5835e+06	6.69	0.0144	8.6564	Arg C3	13	7	44503.3	1.8979	1138.57	4.92341e+06	7.48	0.0152	9.0966	Arg
										14	8	44539.2	1.8869	1132	427869	7.66	0.0132	7.9228	Arg C3	12	6	39088.6	3.2208	1932.22	1.64667e+06	8.15	0.0098	5.8688	Arg C5 triplet	12	6	39088.8	3.2208	1932.24	3.15513e+06	8.17	0.0098	5.8688	Arg C5 triplet	12	6	39093.1	3.221	1932.35	5.32693e+06	8.1	0.01	6.0155	Arg
										13	8	44489.6	1.899	1139.27	389389	6.97	0.0203	12.1777	Arg C3	11	6	39040.1	3.2327	1939.34	3.02876e+06	15	0.0081	4.8417	Arg C5 triplet	11	6	39040.2	3.2327	1939.36	5.79412e+06	15	0.0078	4.695	Arg C5 triplet	11	6	39044.8	3.2328	1939.44	9.86798e+06	15	0.0093	5.5753	Arg
										12	6	39086.5	3.2205	1932.02	437078	7.83	0.0073	4.4016	Arg C5 triplet	10	6	38991.5	3.2445	1946.47	1.55381e+06	7.69	0.0093	5.5753	Arg C5 triplet	10	6	38991.5	3.2446	1946.51	2.9501e+06	7.64	0.0093	5.5753	Arg C5 triplet	10	6	38996.7	3.2446	1946.5	5.33389e+06	8.11	0.0098	5.8688	Arg
										11	6	39037.7	3.2324	1939.17	837513	15	0.0064	3.8147	Arg C5 triplet	9	5	36962.7	3.7407	2244.14	642131	3.18	0.0088	5.2819	Arg alpha C triplet	9	5	36965.2	3.7402	2243.82	1.15506e+06	2.99	0.0088	5.2819	Arg alpha C triplet	9	5	36972.7	3.7396	2243.45	2151547	3.27	0.009	5.4286	Arg
										10	6	38988.9	3.2443	1946.33	430698	7.72	0.0071	4.2549	Arg C5 triplet	8	5	36919.6	3.7513	2250.46	1.15364e+06	5.71	0.0081	4.8417	Arg alpha C triplet	8	5	36922.1	3.7507	2250.14	2.07694e+06	5.38	0.0076	4.5483	Arg alpha C triplet	8	5	36930	3.75	2249.72	3.90544e+06	5.94	0.0095	5.722	Arg
										9	5	36963.8	3.7396	2243.46	164121	2.94	0.0078	4.695	Arg alpha C triplet	7	5	36876.7	3.7617	2256.74	623698	3.09	0.0086	5.1352	Arg alpha C triplet	7	5	36879.3	3.7612	2256.42	1.12723e+06	2.92	0.0083	4.9885	Arg alpha C triplet	7	5	36887.7	3.7604	2255.93	2.22235e+06	3.38	0.0088	5.2819	Arg
										8	5	36920.8	3.7501	2249.76	304969	5.46	0.0068	4.1081	Arg alpha C triplet	6	4	35974.5	3.9824	2389.12	86353.8	0.43	0.0181	10.8572	Ribose C5	6	4	35978.1	3.9816	2388.64	93910.7	0.24	0.0183	11.0039	Ribose C5	6	4	35987.6	3.9805	2387.99	91555.2	0.14	0.0186	11.1507	R5
										7	5	36878.7	3.7604	2255.95	175975	3.15	0.0088	5.2819	Arg alpha C triplet	5	3	34656.7	4.3047	2582.47	19955.4	0.1	0.0164	9.8302	Ribose C4	5	3	34658.4	4.3043	2582.26	21370	0.06	0.0174	10.4171	Ribose C4	5	3	34660.9	4.305	2582.63	19132.9	0.03	0.0157	9.39	R4
										6	4	35975.7	3.9813	2388.43	108872	1.95	0.0176	10.5638	Ribose C5	4	3	33945	4.4787	2686.88	5707.74	0.03	0.0095	5.722	Ribose C3	4	3	33941.9	4.4796	2687.39	5635.48	0.01	0.0103	6.1622	Ribose C3	4	3	33958.7	4.4767	2685.66	1724.03	0	0.0034	2.0541	R3
										5	3	34661	4.3028	2581.33	24304.8	0.44	0.0166	9.9769	Ribose C4	3	2	28087.4	5.9113	3546.31	25111.8	0.12	0.0095	5.722	Ribose C1	3	2	28088.4	5.9111	3546.21	27214.5	0.07	0.009	5.4286	Ribose C1	3	2	28092.6	5.9113	3546.33	25834.3	0.04	0.0098	5.8688	R1
										4	3	33943.8	4.4782	2686.55	7896.87	0.14	0.0169	10.1236	Ribose C3	2	2	28046.7	5.9213	3552.28	23116.8	0.11	0.0086	5.1352	Ribose C1	2	2	28046.9	5.9213	3552.31	25198.9	0.07	0.0088	5.2819	Ribose C1	2	2	28052.8	5.9211	3552.17	23572.9	0.04	0.0093	5.5753	R1
										3	2	28085	5.911	3546.15	33275.2	0.6	0.0071	4.2549	Ribose C1	1	1	18793.1	8.1844	4909.96	60009.2	0.3	0.0071	4.2549	GMP H8	1	1	18791.1	8.1849	4910.3	65568.1	0.17	0.0071	4.2549	GMP H8	1	1	18792.6	8.1858	4910.82	61037.8	0.09	0.0078	4.695	GMP8
										2	2	28043.2	5.9212	3552.28	31825.1	0.57	0.0071	4.2549	Ribose C1
										1	1	18785.9	8.1853	4910.51	82316.2	1.48	0.0056	3.3745	GMP H8
UMP - Arg
Sample 26	UMP - Arg	1:1	0.1 mM UMP	0.1 mM Arg	13.10.2022					Sample 27	UMP - Arg	1:10	0.1 mM UMP	1 mM Arg	13.10.2022					Sample 28	UMP - Arg	1:25	0.1 mM UMP	2.5 mM Arg	13.10.2022					Sample 29	UMP - Arg	1:50	0.1 mM UMP	5 mM Arg	13.10.2022					Sample 30	UMP - Arg	1:100	0.1 mM UMP	10 mM Arg	13.10.2022
Peak	Region	Index (F1)	ν(F1) [ppm]	ν(F1) [Hz]	Intensity [abs]	Intensity [rel]	Half width [ppm]	Half width [Hz]	Annotation	Peak	Region	Index (F1)	ν(F1) [ppm]	ν(F1) [Hz]	Intensity [abs]	Intensity [rel]	Half width [ppm]	Half width [Hz]	Annotation	Peak	Region	Index (F1)	ν(F1) [ppm]	ν(F1) [Hz]	Intensity [abs]	Intensity [rel]	Half width [ppm]	Half width [Hz]	Annotation	Peak	Region	Index (F1)	ν(F1) [ppm]	ν(F1) [Hz]	Intensity [abs]	Intensity [rel]	Half width [ppm]	Half width [Hz]	Annotation	Peak	Region	Index (F1)	ν(F1) [ppm]	ν(F1) [Hz]	Intensity [abs]	Intensity [rel]	Half width [ppm]	Half width [Hz]	Annotation
30	7	52257.9	-0.0001	-0.0756	438613	15	0.0076	4.5483	DSS	30	10	52261.1	-0.0001	-0.075	382921	10.87	0.0081	4.8417	DSS	27	6	52257.7	-0.0001	-0.0714	346397	2.84	0.0098	5.8688	DSS	31	6	52260.3	-0.0001	-0.0756	445410	1.31	0.0064	3.8147	DSS	33	6	52262.6	-0.0001	-0.075	454353	0.54	0.0078	4.695	DSS
29	6	45538.9	1.6431	985.73	20116.3	0.69	0.0108	6.4556	Arg C4	29	9	45542.6	1.643	985.664	104978	2.98	0.0112	6.7491	Arg C4	26	5	45538.3	1.6432	985.797	408896	3.35	0.0254	15.2588	Arg C4	30	5	45583.1	1.6329	979.589	750100	2.21	0.0161	9.6835	Arg C4	32	5	45607.7	1.6274	976.33	1.77573e+06	2.1	0.0112	6.7491	Arg C4
28	6	45510.3	1.6501	989.929	22027.3	0.75	0.0115	6.8958	Arg C4	28	9	45514	1.65	989.856	110364	3.13	0.0117	7.0425	Arg C4	25	5	45518.4	1.6481	988.709	421942	3.46	0.012	7.1892	Arg C4	29	5	45542.1	1.6429	985.611	862897	2.55	0.0108	6.4556	Arg C4	31	5	45584.4	1.6331	979.744	2.15116e+06	2.55	0.0071	4.2549	Arg C4
27	6	45464.4	1.6613	996.667	18512.3	0.63	0.0122	7.336	Arg C4	27	9	45465.6	1.6618	996.959	93277.4	2.65	0.0122	7.336	Arg C4	24	5	45465.5	1.661	996.482	342050	2.8	0.0132	7.9228	Arg C4	28	5	45511.3	1.6504	990.124	944396	2.79	0.0108	6.4556	Arg C4	30	5	45560	1.6391	983.323	2.32306e+06	2.75	0.0051	3.0811	Arg C4
26	6	45415.4	1.6733	1003.85	12923.8	0.44	0.0098	5.8688	Arg C4	26	9	45412.2	1.6749	1004.79	64354.1	1.83	0.0108	6.4556	Arg C4	23	5	45407.6	1.6752	1004.98	240533	1.97	0.0095	5.722	Arg C4	27	5	45464	1.662	997.075	820991	2.42	0.011	6.6024	Arg C4	29	5	45541.6	1.6436	986.03	2.50182e+06	2.96	0.0064	3.8147	Arg C4
25	6	45295.9	1.7025	1021.39	23390.6	0.8	0.0149	8.9499	Arg C4	25	9	45360.7	1.6875	1012.34	81695.2	2.32	0.0122	7.336	Arg C4	22	5	45352.1	1.6887	1013.11	316407	2.59	0.012	7.1892	Arg C4	26	5	45413.7	1.6743	1004.44	556414	1.64	0.0108	6.4556	Arg C4	28	5	45513.9	1.6504	990.083	2.62174e+06	3.1	0.0112	6.7491	Arg C4
24	6	45247.7	1.7143	1028.46	25990	0.89	0.012	7.1892	Arg C4	24	9	45299	1.7025	1021.39	124913	3.55	0.0166	9.9769	Arg C4	21	5	45298.8	1.7018	1020.93	461222	3.78	0.0164	9.8302	Arg C4	25	5	45363.7	1.6865	1011.79	716942	2.11	0.0122	7.336	Arg C4	27	5	45465.8	1.6621	997.152	2.17878e+06	2.58	0.0122	7.336	Arg C4
23	6	45203.2	1.7252	1034.99	28682.9	0.98	0.012	7.1892	Arg C4	23	9	45250.7	1.7144	1028.49	133874	3.8	0.0117	7.0425	Arg C4	20	5	45250.1	1.7137	1028.09	468247	3.84	0.0245	14.6719	Arg C4	24	5	45297.7	1.7027	1021.47	1.01052e+06	2.98	0.0152	9.0966	Arg C4	26	5	45413.4	1.6749	1004.83	1.48843e+06	1.76	0.0108	6.4556	Arg C4
22	6	45147.2	1.7389	1043.2	29187.4	1	0.0179	10.7105	Arg C4	22	9	45207.1	1.725	1034.88	121251	3.44	0.011	6.6024	Arg C4	19	5	45159.8	1.7358	1041.33	276488	2.27	0.0205	12.3244	Arg C4	23	5	45250.3	1.7143	1028.42	1.08581e+06	3.2	0.013	7.7761	Arg C4	25	5	45362.2	1.6875	1012.35	1.90492e+06	2.26	0.0125	7.4827	Arg C4
21	6	45086.5	1.7537	1052.11	32242.9	1.1	0.0157	9.39	Arg C4	21	9	45158.9	1.7368	1041.95	99151.3	2.81	0.0171	10.2703	Arg C4	18	5	44542.1	1.8868	1131.95	1.17616e+06	9.64	0.024	14.3785	Arg C3	22	5	45207.4	1.7248	1034.72	877326	2.59	0.0112	6.7491	Arg C4	24	5	45298.3	1.7031	1021.72	2.77905e+06	3.29	0.0142	8.5097	Arg C4
20	6	45029.3	1.7677	1060.5	21729.5	0.74	0.0144	8.6564	Arg C4	20	9	45093.2	1.7529	1051.6	67704.9	1.92	0.0142	8.5097	Arg C4	17	5	44495.2	1.8983	1138.84	1.02491e+06	8.4	0.0171	10.2703	Arg C3	21	5	45160.1	1.7363	1041.66	641757	1.89	0.0115	6.8958	Arg C4	23	5	45274.9	1.7088	1025.16	2.37501e+06	2.81	0.0029	1.7606	Arg C4
19	6	44970.8	1.7821	1069.09	13379	0.46	0.0122	7.336	Arg C4	19	9	44589.9	1.876	1125.43	195372	5.54	0.0103	6.1622	Arg C3	16	4	39086.5	3.2211	1932.4	1.04622e+06	8.58	0.0105	6.3089	Arg C5 triplet	20	5	44654.9	1.8599	1115.78	505417	1.49	0.0103	6.1622	Arg C3	22	5	45250.9	1.7147	1028.68	2.82516e+06	3.35	0.0117	7.0425	Arg C4
18	6	44586	1.8761	1125.54	33707.1	1.15	0.0105	6.3089	Arg C3	18	9	44543.8	1.8873	1132.21	322317	9.15	0.0161	9.6835	Arg C3	15	4	39039.3	3.2326	1939.32	1.82931e+06	15	0.0132	7.9228	Arg C5 triplet	19	5	44594.5	1.8746	1124.64	1.57978e+06	4.66	0.0105	6.3089	Arg C3	21	5	45207.1	1.7254	1035.1	2.18307e+06	2.58	0.011	6.6024	Arg C4
17	6	44540.4	1.8873	1132.23	55893.8	1.91	0.0135	8.0696	Arg C3	17	9	44496.4	1.8988	1139.15	306036	8.68	0.021	12.6178	Arg C3	14	4	38992.2	3.2442	1946.24	986232	8.09	0.01	6.0155	Arg C5 triplet	18	5	44545.8	1.8866	1131.78	2.65798e+06	7.84	0.0137	8.2163	Arg C3	20	5	45160.1	1.7369	1042	1.44771e+06	1.71	0.0103	6.1622	Arg C4
16	6	44493.8	1.8987	1139.06	47334.8	1.62	0.0135	8.0696	Arg C3	16	8	39090.5	3.2209	1932.31	285583	8.1	0.0098	5.8688	Arg C5 triplet	13	3	36965.5	3.7398	2243.59	411622	3.38	0.0073	4.4016	Arg alpha C triplet	17	5	44497.7	1.8983	1138.85	2407778	7.1	0.0179	10.7105	Arg C3	19	5	44587.9	1.8768	1125.95	4.46839e+06	5.29	0.0105	6.3089	Arg C3
15	5	39089	3.2205	1932.06	53618.2	1.83	0.009	5.4286	Arg C5 triplet	15	8	39042.1	3.2328	1939.4	528453	15	0.009	5.4286	Arg C5 triplet	12	3	36924.3	3.7499	2249.64	710989	5.83	0.0166	9.9769	Arg alpha C triplet	16	4	39090.5	3.2207	1932.18	2.70426e+06	7.98	0.0083	4.9885	Arg C5 triplet	18	5	44542.1	1.888	1132.67	7.19333e+06	8.52	0.0166	9.9769	Arg C3
14	5	39040.5	3.2324	1939.17	101994	3.48	0.0078	4.695	Arg C5 triplet	14	8	38994.1	3.2445	1946.45	288939	8.2	0.0098	5.8688	Arg C5 triplet	11	3	36883.5	3.7599	2255.62	431206	3.54	0.0078	4.695	Arg alpha C triplet	15	4	38993	3.2446	1946.49	2.64345e+06	7.8	0.0083	4.9885	Arg C5 triplet	17	5	44495.4	1.8994	1139.52	6.04615e+06	7.16	0.0135	8.0696	Arg C3
13	5	38992.5	3.2441	1946.22	55032.8	1.88	0.009	5.4286	Arg C5 triplet	13	6	36968.2	3.74	2243.69	125578	3.56	0.0086	5.1352	Arg alpha C triplet	10	2	36017.3	3.9717	2382.7	46161.4	0.38	0.01	6.0155	Ribose C5	14	3	36972.5	3.7387	2242.93	1.16484e+06	3.44	0.0081	4.8417	Arg alpha C triplet	16	4	39090.2	3.2214	1932.57	7.0651e+06	8.36	0.01	6.0155	Arg C5 triplet
12	4	36966.4	3.7396	2243.48	22518.7	0.77	0.0086	5.1352	Arg alpha C triplet	12	6	36926	3.7503	2249.88	228656	6.49	0.0112	6.7491	Arg alpha C triplet	9	2	35880	4.0053	2402.85	53654.6	0.44	0.0166	9.9769	Ribose C5	13	3	36929.4	3.7493	2249.26	2145472	6.33	0.0064	3.8147	Arg alpha C triplet	15	4	39041.8	3.2332	1939.67	1.26678e+07	15	0.0088	5.2819	Arg C5 triplet
11	4	36923.7	3.7501	2249.75	40502.1	1.38	0.0076	4.5483	Arg alpha C triplet	11	6	36885.2	3.7603	2255.87	148030	4.2	0.0093	5.5753	Arg alpha C triplet	8	2	35801.4	4.0245	2414.38	24017.8	0.2	0.0137	8.2163	Ribose C5	12	3	36886.7	3.7597	2255.53	1.18847e+06	3.51	0.0081	4.8417	Arg alpha C triplet	14	4	38993.5	3.245	1946.75	6.56488e+06	7.77	0.0095	5.722	Arg C5 triplet
10	4	36880.9	3.7605	2256.02	23329.6	0.8	0.0083	4.9885	Arg alpha C triplet	10	4	36020.5	3.9718	2382.74	46848.1	1.33	0.021	12.6178	Ribose C5	7	2	34896.9	4.2457	2547.09	36338.1	0.3	0.0176	10.5638	Ribose C4	11	2	36107.3	3.9503	2369.87	32707.8	0.1	0.0147	8.8031	Ribose C5	13	3	36964.9	3.7412	2244.39	2.85716e+06	3.38	0.009	5.4286	Arg alpha C triplet
9	4	36016	3.9721	2382.92	49186.3	1.68	0.0218	13.058	Ribose C5	9	4	35881.2	4.0058	2403.17	54507.8	1.55	0.0157	9.39	Ribose C5	6	2	34488.5	4.3456	2607.01	21256.9	0.17	0.0132	7.9228	Ribose C3	10	2	36027.8	3.9698	2381.54	58420.3	0.17	0.0259	15.5522	Ribose C5	12	3	36922	3.7517	2250.69	5.03726e+06	5.97	0.009	5.4286	Arg alpha C triplet
8	4	35875.8	4.0064	2403.5	56789.9	1.94	0.0161	9.6835	Ribose C5	8	4	35801.5	4.0253	2414.86	25010.1	0.71	0.0142	8.5097	Ribose C5	5	2	34236.6	4.4072	2643.98	12311.1	0.1	0.0103	6.1622	Ribose C2	9	2	35884.1	4.0049	2402.63	68657.1	0.2	0.0157	9.39	Ribose C5	11	3	36879.5	3.762	2256.92	2.73854e+06	3.24	0.0083	4.9885	Arg alpha C triplet
7	4	35796.9	4.0257	2415.07	27867.4	0.95	0.0127	7.6294	Ribose C5	7	3	34895.7	4.2468	2547.76	36737.6	1.04	0.0166	9.9769	Ribose C4	4	1	27849.5	5.9693	3581.07	30728.8	0.25	0.0093	5.5753	UMP H6, Ribose C1	8	2	35804.8	4.0243	2414.25	34436	0.1	0.0164	9.8302	Ribose C5	10	2	36020.8	3.972	2382.91	39417.3	0.05	0.0095	5.722	Ribose C5
6	3	34891.8	4.247	2547.87	41148	1.41	0.0181	10.8572	Ribose C4	6	3	34484.5	4.3474	2608.09	23091.3	0.66	0.0183	11.0039	Ribose C3	3	1	27790.9	5.9836	3589.67	50845.3	0.42	0.0183	11.0039	UMP H6, Ribose C1	7	2	34901.6	4.2452	2546.77	45861.7	0.14	0.0179	10.7105	Ribose C4	9	2	35876.9	4.0072	2404.02	47247.6	0.06	0.0139	8.363	Ribose C5
5	3	34481.2	4.3474	2608.11	25832.7	0.88	0.0196	11.7375	Ribose C3	5	3	34227.7	4.4102	2645.77	12278.3	0.35	0.0144	8.6564	Ribose C2	2	1	19167.6	8.0926	4854.88	46661.3	0.38	0.0095	5.722	UMP H5	6	2	34485.1	4.347	2607.88	31267.8	0.09	0.0149	8.9499	Ribose C3	8	2	35798.6	4.0264	2415.51	17367.7	0.02	0.0132	7.9228	Ribose C5
4	3	34225.2	4.41	2645.67	15230.6	0.52	0.0112	6.7491	Ribose C2	4	2	27852.4	5.9694	3581.14	32338.1	0.92	0.0088	5.2819	UMP H6, Ribose C1	1	1	19110.6	8.1065	4863.24	44577.1	0.37	0.0095	5.722	UMP H5	5	2	34225.7	4.4105	2645.94	20821	0.06	0.0108	6.4556	Ribose C2	7	2	34902.1	4.2456	2547.04	32277.2	0.04	0.0147	8.8031	Ribose C4
3	2	27777.3	5.987	3591.7	54379.7	1.86	0.0073	4.4016	UMP H6, Ribose C1	3	2	27781.9	5.9866	3591.49	51287.7	1.46	0.0073	4.4016	UMP H6, Ribose C1											4	1	27854.4	5.9687	3580.74	38005.9	0.11	0.0088	5.2819	UMP H6, Ribose C1	6	2	34491	4.3462	2607.36	20063.6	0.02	0.0132	7.9228	Ribose C3
2	1	19169.3	8.0922	4854.66	53823.9	1.84	0.0073	4.4016	UMP H5	2	1	19170.6	8.0926	4854.93	51679.7	1.47	0.0073	4.4016	UMP H5											3	1	27799.6	5.9821	3588.78	55748.5	0.16	0.0086	5.1352	UMP H6, Ribose C1	5	2	34233.1	4.4093	2645.2	8624.94	0.01	0.0073	4.4016	Ribose C2
1	1	19112.3	8.1061	4863.02	51846	1.77	0.0076	4.5483	UMP H5	1	1	19113.3	8.1067	4863.35	50558.4	1.43	0.0078	4.695	UMP H5											2	1	19169.9	8.0926	4854.92	58536.1	0.17	0.0068	4.1081	UMP H5	4	1	27863.4	5.9671	3579.75	34005	0.04	0.01	6.0155	UMP H6, Ribose C1
																														1	1	19112.1	8.1068	4863.4	57153.7	0.17	0.0068	4.1081	UMP H5	3	1	27807.8	5.9807	3587.92	55366.9	0.07	0.0142	8.5097	UMP H6, Ribose C1
																																								2	1	19182.1	8.0902	4853.46	54907.4	0.07	0.0073	4.4016	UMP H5
																																								1	1	19125	8.1042	4861.85	51847.2	0.06	0.0073	4.4016	UMP H5
[truncated: 40 more columns]

## Sheet: S31 Aspartate
1:1										1:10										1:25										1:50										1:100
AMP - Asp
Sample 1	AMP - Asp	1:1	0.1 mM AMP	0.1 mM Asp	09.12.2022					Sample 2	AMP - Asp	1:10	0.1 mM AMP	1 mM Asp	09.12.2022					Sample 3	AMP - Asp	1:25	0.1 mM AMP	2.5 mM Asp	09.12.2022					Sample 4	AMP - Asp	1:50	0.1 mM AMP	5 mM Asp	09.12.2022					Sample 5	AMP - Asp	1:100	0.1 mM AMP	10 mM Asp	09.12.2022
Peak	Region	Index (F1)	ν(F1) [ppm]	ν(F1) [Hz]	Intensity [abs]	Intensity [rel]	Half width [ppm]	Half width [Hz]	Annotation	Peak	Region	Index (F1)	ν(F1) [ppm]	ν(F1) [Hz]	Intensity [abs]	Intensity [rel]	Half width [ppm]	Half width [Hz]	Annotation	Peak	Region	Index (F1)	ν(F1) [ppm]	ν(F1) [Hz]	Intensity [abs]	Intensity [rel]	Half width [ppm]	Half width [Hz]	Annotation	Peak	Region	Index (F1)	ν(F1) [ppm]	ν(F1) [Hz]	Intensity [abs]	Intensity [rel]	Half width [ppm]	Half width [Hz]	Annotation	Peak	Region	Index (F1)	ν(F1) [ppm]	ν(F1) [Hz]	Intensity [abs]	Intensity [rel]	Half width [ppm]	Half width [Hz]	Annotation
19	5	41509.2	2.6306	1578.18	16669.7	0.35	0.0066	3.9614	Asp	20	6	52267.9	-0.0001	-0.0702	424319	8.68	0.0071	4.2549	DSS	20	7	52259.4	-0.0001	-0.0726	405887	5.02	0.0071	4.2549	DSS	18	7	52261.4	-0.0001	-0.0732	362534	2.42	0.0086	5.1352	DSS	17	10	52260	-0.0001	-0.0756	338649	1.11	0.0093	5.5753	DSS
18	5	41444.3	2.6465	1587.69	22815	0.48	0.0088	5.2819	Asp	19	5	41510.8	2.6307	1578.2	146907	3	0.0073	4.4016	Asp	19	6	41501.8	2.6308	1578.27	372510	4.61	0.0073	4.4016	Asp	17	6	41437.1	2.6471	1588.05	965561	6.45	0.0098	5.8688	Asp	16	8	41500.1	2.6314	1578.62	1.35022e+06	4.44	0.0098	5.8688	Asp
17	5	41389.7	2.6599	1595.7	38054.7	0.8	0.0073	4.4016	Asp	18	5	41445.8	2.6466	1587.74	205273	4.19	0.0088	5.2819	Asp	18	6	41436.9	2.6467	1587.79	529602	6.55	0.0088	5.2819	Asp	16	6	41384.2	2.6601	1595.82	1.59682e+06	10.67	0.0103	6.1622	Asp	15	8	41433.1	2.6478	1588.45	1.92654e+06	6.33	0.0098	5.8688	Asp
16	5	41325.8	2.6755	1605.09	40455.1	0.85	0.0076	4.5483	Asp	17	5	41391.5	2.6599	1595.71	353570	7.22	0.0083	4.9885	Asp	17	6	41382.7	2.6599	1595.74	881039	10.89	0.0083	4.9885	Asp	15	6	41319.3	2.6759	1605.34	1.64314e+06	10.98	0.0095	5.722	Asp	14	8	41381.5	2.6604	1596.01	3.15326e+06	10.35	0.0112	6.7491	Asp
15	5	40871.6	2.7866	1671.72	52274.8	1.1	0.0083	4.9885	Asp	16	5	41327.1	2.6756	1605.16	373072	7.63	0.0083	4.9885	Asp	16	6	41318.3	2.6757	1605.2	929017	11.48	0.0078	4.695	Asp	14	6	40866.1	2.7868	1671.83	2.24411e+06	15	0.0149	8.9499	Asp	13	8	41316.3	2.6763	1605.58	3.2378e+06	10.63	0.0105	6.3089	Asp
14	5	40847.7	2.7924	1675.22	45134.8	0.95	0.0056	3.3745	Asp	15	5	40873.3	2.7866	1671.73	481864	9.85	0.0083	4.9885	Asp	15	6	40864.7	2.7866	1671.74	1.21358e+06	15	0.0083	4.9885	Asp	13	6	40745.3	2.8163	1689.57	1.07771e+06	7.2	0.0061	3.668	Asp	12	8	40863.8	2.787	1671.96	4.5679e+06	15	0.0154	9.2433	Asp
13	5	40751.3	2.816	1689.38	26094.2	0.55	0.0068	4.1081	Asp	14	5	40850.6	2.7921	1675.06	431924	8.82	0.0059	3.5213	Asp	14	6	40841.8	2.7922	1675.1	1.08627e+06	13.43	0.0059	3.5213	Asp	12	6	40727	2.8208	1692.25	1.10978e+06	7.42	0.0083	4.9885	Asp	11	8	40733.4	2.8189	1691.11	2.27268e+06	7.46	0.0142	8.5097	Asp
12	5	40728.5	2.8216	1692.72	25134.4	0.53	0.0061	3.668	Asp	13	5	40752.8	2.8161	1689.41	232639	4.75	0.0071	4.2549	Asp	13	6	40744.3	2.816	1689.4	592048	7.32	0.0068	4.1081	Asp	11	5	36399.4	3.8792	2327.19	1.61235e+06	10.78	0.0078	4.695	Asp	10	6	36396.3	3.8796	2327.44	3.25946e+06	10.7	0.0068	4.1081	Asp
11	4	36405.1	3.8789	2327.04	37111.6	0.78	0.0078	4.695	Asp	12	5	40730.7	2.8215	1692.65	234889	4.8	0.0064	3.8147	Asp	12	6	40722.2	2.8215	1692.66	590008	7.29	0.0064	3.8147	Asp	10	5	36379	3.8842	2330.18	1.5706e+06	10.5	0.0081	4.8417	Asp	9	6	36334.9	3.8946	2336.45	2.66231e+06	8.74	0.0054	3.2278	Asp
10	4	36381.1	3.8848	2330.56	35783.3	0.75	0.0076	4.5483	Asp	11	4	36407.1	3.8789	2327.02	335147	6.85	0.0076	4.5483	Asp	11	5	36398.1	3.879	2327.07	862197	10.66	0.0076	4.5483	Asp	9	5	36337.7	3.8942	2336.24	1.3205e+06	8.83	0.0068	4.1081	Asp	8	6	36324.5	3.8972	2337.98	2.6707e+06	8.77	0.009	5.4286	Asp
9	4	36342.9	3.8941	2336.17	32089.2	0.67	0.0078	4.695	Asp	10	4	36384	3.8845	2330.41	316170	6.46	0.0076	4.5483	Asp	10	5	36374.8	3.8847	2330.5	819875	10.13	0.0076	4.5483	Asp	8	5	36316.5	3.8994	2339.35	1.29534e+06	8.66	0.0076	4.5483	Asp	7	5	35898.5	4.0013	2400.47	184446	0.61	0.0183	11.0039	R5
8	4	36318.6	3.9001	2339.73	29086.5	0.61	0.0064	3.8147	Asp	9	4	36344.5	3.8942	2336.2	276249	5.64	0.0076	4.5483	Asp	9	5	36335.8	3.8942	2336.23	721337	8.92	0.0076	4.5483	Asp	7	4	35899.6	4.0014	2400.52	163204	1.09	0.0174	10.4171	R5	6	3	34460.5	4.353	2611.46	24426.8	0.08	0.0174	10.4171	R4
7	4	35904	4.0015	2400.56	165832	3.48	0.0171	10.2703	R5	8	4	36321	3.8999	2339.64	269253	5.5	0.0071	4.2549	Asp	8	5	36312.1	3.9	2339.7	687960	8.51	0.0068	4.1081	Asp	6	3	34463.2	4.3527	2611.27	18505.6	0.12	0.0149	8.9499	R4	5	3	33857.5	4.5005	2699.93	4887.5	0.02	0.0039	2.3475	R3
6	3	34467.8	4.3527	2611.28	23032.9	0.48	0.0164	9.8302	R4	7	4	35905.6	4.0015	2400.59	164713	3.37	0.0174	10.4171	R5	7	4	35897.9	4.0013	2400.47	173917	2.15	0.0176	10.5638	R5	5	8	33858	4.5007	2700.06	93.4	0	0.0007	0.4402	R3	4	2	27232.1	6.1208	3672	40098.3	0.13	0.01	6.0155	R1
5	3	33869	4.4991	2699.13	4448.5	0.09	0.0098	5.8688	R3	6	3	34470.3	4.3525	2611.17	24392.5	0.5	0.0161	9.6835	R4	6	3	34460.6	4.3528	2611.34	34168.3	0.42	0.024	14.3785	R4	4	2	27234.9	6.1205	3671.79	38206.3	0.26	0.0098	5.8688	R1	3	2	27195.1	6.1299	3677.43	38747.9	0.13	0.0093	5.5753	R1
4	2	27240.5	6.1203	3671.67	46410.1	0.97	0.0088	5.2819	R1	5	3	33872.8	4.4987	2698.84	5129.87	0.1	0.0108	6.4556	R3	5	3	33859.8	4.4998	2699.5	13442.7	0.17	0.0318	19.0735	R3	3	2	27197	6.1297	3677.35	38156.5	0.26	0.009	5.4286	R1	2	1	18502.6	8.2558	4952.79	58274.7	0.19	0.0088	5.2819	AMP2
3	2	27201.2	6.1299	3677.44	43976.7	0.92	0.0083	4.9885	R1	4	2	27242.7	6.1202	3671.61	44628.3	0.91	0.009	5.4286	R1	4	2	27233.1	6.1204	3671.76	44227.4	0.55	0.0088	5.2819	R1	2	1	18505.2	8.2554	4952.6	58316.8	0.39	0.0083	4.9885	AMP2	1	1	17115.1	8.5951	5156.36	78952.8	0.26	0.0088	5.2819	AMP8
2	1	18509.9	8.2554	4952.61	71828.7	1.51	0.0066	3.9614	AMP2	3	2	27203.3	6.1298	3677.38	42430.6	0.87	0.0083	4.9885	R1	3	2	27194.7	6.1298	3677.4	42755.6	0.53	0.0088	5.2819	R1	1	1	17116.1	8.5952	5156.41	80092.5	0.54	0.0081	4.8417	AMP8
1	1	17121.1	8.5951	5156.37	97068.7	2.04	0.0064	3.8147	AMP8	2	1	18512.6	8.2552	4952.48	66620.6	1.36	0.0071	4.2549	AMP2	2	1	18502.7	8.2556	4952.67	65443.4	0.81	0.0071	4.2549	AMP2
										1	1	17123.8	8.5949	5156.24	92553.4	1.89	0.0071	4.2549	AMP8	1	1	17113.5	8.5953	5156.5	88596.9	1.09	0.0068	4.1081	AMP8
CMP - Asp
										Sample 10	CMP - Asp	1:10	0.1 mM CMP	1 mM Asp	09.12.2022					Sample 11	CMP - Asp	1:25	0.1 mM CMP	2.5 mM Asp	09.12.2022					Sample 12	CMP - Asp	1:50	0.1 mM CMP	5 mM Asp	13.12.2022					Sample 13	CMP - Asp	1:100	0.1 mM CMP	10 mM Asp	13.12.2022
										Peak	Region	Index (F1)	ν(F1) [ppm]	ν(F1) [Hz]	Intensity [abs]	Intensity [rel]	Half width [ppm]	Half width [Hz]	Annotation	Peak	Region	Index (F1)	ν(F1) [ppm]	ν(F1) [Hz]	Intensity [abs]	Intensity [rel]	Half width [ppm]	Half width [Hz]	Annotation	Peak	Region	Index (F1)	ν(F1) [ppm]	ν(F1) [Hz]	Intensity [abs]	Intensity [rel]	Half width [ppm]	Half width [Hz]	Annotation	Peak	Region	Index (F1)	ν(F1) [ppm]	ν(F1) [Hz]	Intensity [abs]	Intensity [rel]	Half width [ppm]	Half width [Hz]	Annotation
										23	5	52263.9	-0.0001	-0.0708	355793	5.58	0.0081	4.8417	DSS	23	7	52256.5	-0.0001	-0.0714	381130	6.05	0.0071	4.2549	DSS	22	7	52267.1	-0.0001	-0.072	375496	5.17	0.0064	3.8147	DSS	21	8	52272.2	-0.0001	-0.0738	254140	1.22	0.0122	7.336	DSS
										22	4	41504.9	2.6311	1578.48	54984.2	0.86	0.009	5.4286	Asp	22	6	41498	2.631	1578.4	293327	4.66	0.0068	4.1081	Asp	21	6	41507.3	2.6314	1578.6	346182	4.76	0.0066	3.9614	Asp	20	7	41510.1	2.6319	1578.94	801766	3.86	0.0132	7.9228	Asp
										21	4	41439.7	2.6471	1588.04	75232.3	1.18	0.0098	5.8688	Asp	21	6	41433.1	2.6469	1587.94	396847	6.3	0.0088	5.2819	Asp	20	6	41442.7	2.6472	1588.08	468984	6.45	0.0086	5.1352	Asp	19	7	41443.1	2.6483	1588.77	1177052	5.66	0.0068	4.1081	Asp
										20	4	41385.9	2.6603	1595.95	129788	2.03	0.0103	6.1622	Asp	20	6	41378.7	2.6602	1595.92	710424	11.28	0.0078	4.695	Asp	19	6	41387.8	2.6606	1596.13	825497	11.36	0.0068	4.1081	Asp	18	7	41431.8	2.6511	1590.42	1.17799e+06	5.67	0.0027	1.6139	Asp
										19	4	41321.4	2.676	1605.41	132724	2.08	0.0103	6.1622	Asp	19	6	41314.1	2.676	1605.39	741540	11.78	0.0086	5.1352	Asp	18	6	41323.7	2.6763	1605.54	868091	11.94	0.0071	4.2549	Asp	17	7	41391.5	2.6609	1596.34	2.0401e+06	9.81	0.0171	10.2703	Asp
										18	4	40867.6	2.787	1671.99	176873	2.77	0.0073	4.4016	Asp	18	6	40861.7	2.7867	1671.77	944979	15	0.0073	4.4016	Asp	17	6	40872.6	2.7866	1671.72	1.09092e+06	15	0.0076	4.5483	Asp	16	7	41326.6	2.6768	1605.86	2.12156e+06	10.21	0.0159	9.5367	Asp
										17	4	40846.2	2.7923	1675.13	176633	2.77	0.0076	4.5483	Asp	17	6	40838.6	2.7923	1675.15	902151	14.32	0.0066	3.9614	Asp	16	6	40848.7	2.7924	1675.23	975196	13.41	0.0059	3.5213	Asp	15	7	40872.7	2.7878	1672.45	3.11812e+06	15	0.0083	4.9885	Asp
										16	4	40747.4	2.8164	1689.62	82151.7	1.29	0.0059	3.5213	Asp	16	6	40741.3	2.8161	1689.44	452480	7.18	0.0064	3.8147	Asp	15	6	40752.3	2.816	1689.37	514621	7.08	0.0066	3.9614	Asp	14	7	40864.8	2.7897	1673.61	3.11511e+06	14.99	0.0086	5.1352	Asp
										15	4	40725.8	2.8217	1692.79	91942.7	1.44	0.0083	4.9885	Asp	15	6	40718.9	2.8216	1692.72	484390	7.69	0.0071	4.2549	Asp	14	6	40729	2.8217	1692.8	525601	7.23	0.0061	3.668	Asp	13	7	40739.2	2.8205	1692.04	1.60228e+06	7.71	0.0161	9.6835	Asp
										14	3	36401.2	3.8793	2327.3	116348	1.82	0.0068	4.1081	Asp	14	5	36395	3.8791	2327.12	614652	9.76	0.0071	4.2549	Asp	13	5	36381.1	3.885	2330.71	664575	9.14	0.0071	4.2549	Asp	12	5	36390	3.8841	2330.15	2.0787e+06	10	0.0171	10.2703	Asp
										13	3	36379.3	3.8847	2330.51	120196	1.88	0.0088	5.2819	Asp	13	5	36371.7	3.8847	2330.53	610662	9.69	0.0081	4.8417	Asp	12	5	36342.7	3.8944	2336.35	577785	7.94	0.0073	4.4016	Asp	11	5	36345.7	3.8949	2336.66	1.75934e+06	8.46	0.0049	2.9344	Asp
										12	3	36339.7	3.8944	2336.31	97233.6	1.52	0.0064	3.8147	Asp	12	5	36332.7	3.8943	2336.26	522130	8.29	0.0071	4.2549	Asp	11	5	36318.2	3.9004	2339.95	579046	7.97	0.0068	4.1081	Asp	10	5	36327.9	3.8993	2339.26	1.80813e+06	8.7	0.0103	6.1622	Asp
										11	3	36316.3	3.9001	2339.75	101650	1.59	0.0086	5.1352	Asp	11	5	36308.7	3.9002	2339.78	526625	8.36	0.0073	4.4016	Asp	10	4	35988.4	3.9811	2388.33	52610.5	0.72	0.0208	12.4711	R5	9	4	36000.4	3.9794	2387.31	63399	0.3	0.0315	18.9268	R5
										10	3	35990.1	3.9799	2387.61	43227.1	0.68	0.0215	12.9113	R5	10	4	35977.4	3.9812	2388.39	47167.1	0.75	0.0213	12.7646	R5	9	4	35757.5	4.0375	2422.2	54288.4	0.75	0.0157	9.39	R5	8	4	35763.6	4.0373	2422.05	56180.7	0.27	0.0281	16.8727	R5
										9	3	35753	4.0379	2422.4	49121.4	0.77	0.0166	9.9769	R5	9	4	35743.1	4.0385	2422.76	50831.6	0.81	0.0161	9.6835	R5	8	4	35676.6	4.0573	2434.08	29576	0.41	0.0161	9.6835	R5	7	3	34970	4.2314	2538.5	40827.2	0.2	0.021	12.6178	R4
										8	3	35673.9	4.0572	2434.01	25931.7	0.41	0.0149	8.9499	R5	8	4	35664.3	4.0578	2434.33	27896.8	0.44	0.0159	9.5367	R5	7	3	34967.3	4.2308	2538.14	41613.2	0.57	0.0176	10.5638	R4	6	3	34554.4	4.333	2599.47	54570	0.26	0.0176	10.5638	R2/3
										7	3	34962	4.2313	2538.46	36612.9	0.57	0.0171	10.2703	R4	7	3	34953.8	4.2315	2538.57	38260.5	0.61	0.0169	10.1236	R4	6	3	34558.4	4.3308	2598.14	58817.4	0.81	0.0071	4.2549	R2/3	5	2	27764.7	5.9935	3595.64	33503.8	0.16	0.0174	10.4171	R1
										6	3	34539.4	4.3347	2600.45	54767.5	0.86	0.0142	8.5097	R2/3	6	3	34532.7	4.3345	2600.36	56217.9	0.89	0.0073	4.4016	R2/3	5	2	27771.7	5.9906	3593.88	35793.2	0.49	0.0068	4.1081	R1	4	2	27238	6.1224	3672.92	30117.3	0.14	0.0132	7.9228	CMP5
										5	2	27754.5	5.994	3595.94	36083.2	0.56	0.0139	8.363	R1	5	2	27748.4	5.9937	3595.74	37365.5	0.59	0.0137	8.2163	R1	4	2	27234	6.1221	3672.77	42003.6	0.58	0.0068	4.1081	CMP5	3	2	27185.8	6.1351	3680.59	29088.3	0.14	0.0139	8.363	CMP5
										4	2	27230.7	6.1221	3672.78	37113.4	0.58	0.009	5.4286	CMP5	4	2	27224.7	6.1218	3672.58	41473.9	0.66	0.0073	4.4016	CMP5	3	2	27180.2	6.1353	3680.66	38330.6	0.53	0.0068	4.1081	CMP5	2	1	19210.3	8.0856	4850.73	38420.5	0.18	0.0117	7.0425	CMP6
										3	2	27176.8	6.1353	3680.69	33310.2	0.52	0.0093	5.5753	CMP5	3	2	27170.5	6.135	3680.54	37002.3	0.59	0.0078	4.695	CMP5	2	1	19205.5	8.0856	4850.7	51842.1	0.71	0.0068	4.1081	CMP6	1	1	19157.7	8.0985	4858.46	41352.5	0.2	0.013	7.7761	CMP6
										2	1	19200	8.0862	4851.05	47316.8	0.74	0.009	5.4286	CMP6	2	1	19196.9	8.0851	4850.41	51848.4	0.82	0.0071	4.2549	CMP6	1	1	19152.3	8.0986	4858.51	53550.8	0.74	0.0068	4.1081	CMP6
										1	1	19146.6	8.0992	4858.87	47822.2	0.75	0.0086	5.1352	CMP6	1	1	19143.9	8.0981	4858.19	52849.4	0.84	0.0071	4.2549	CMP6
GMP - Asp
Sample 17	GMP - Asp	1:1	0.1 mM GMP	0.1 mM Asp	16.12.2022					Sample 18	GMP - Asp	1:10	0.1 mM GMP	1 mM Asp	16.12.2022					Sample 19	GMP - Asp	1:25	0.1 mM GMP	2.5 mM Asp	16.12.2022					Sample 20	GMP - Asp	1:50	0.1 mM GMP	5 mM Asp	16.12.2022					Sample 21	GMP - Asp	1:100	0.1 mM GMP	10 mM Asp	16.12.2022
Peak	Region	Index (F1)	ν(F1) [ppm]	ν(F1) [Hz]	Intensity [abs]	Intensity [rel]	Half width [ppm]	Half width [Hz]	Annotation	Peak	Region	Index (F1)	ν(F1) [ppm]	ν(F1) [Hz]	Intensity [abs]	Intensity [rel]	Half width [ppm]	Half width [Hz]	Annotation	Peak	Region	Index (F1)	ν(F1) [ppm]	ν(F1) [Hz]	Intensity [abs]	Intensity [rel]	Half width [ppm]	Half width [Hz]	Annotation	Peak	Region	Index (F1)	ν(F1) [ppm]	ν(F1) [Hz]	Intensity [abs]	Intensity [rel]	Half width [ppm]	Half width [Hz]	Annotation	Peak	Region	Index (F1)	ν(F1) [ppm]	ν(F1) [Hz]	Intensity [abs]	Intensity [rel]	Half width [ppm]	Half width [Hz]	Annotation
16	7	52262.7	-0.0001	-0.0738	427081	12.35	0.0066	3.9614	DSS	18	7	52262.7	-0.0001	-0.075	312685	13.49	0.0098	5.8688	DSS	18	9	52267	-0.0001	-0.0732	379282	6.83	0.0071	4.2549	DSS	19	6	52256.1	-0.0001	-0.075	421525	4.12	0.0066	3.9614	DSS	19	6	52269.6	-0.0001	-0.072	379784	1.39	0.0073	4.4016	DSS
15	6	41505.1	2.6308	1578.28	4720.92	0.14	0.0066	3.9614	Asp	17	6	41503.1	2.6313	1578.57	57995.6	2.5	0.0108	6.4556	Asp	17	8	41508.4	2.6311	1578.42	256290	4.61	0.0071	4.2549	Asp	18	5	41497.3	2.6311	1578.45	472506	4.61	0.0071	4.2549	Asp	18	5	41509.1	2.6315	1578.7	1.2519e+06	4.59	0.0078	4.695	Asp
14	6	41439.8	2.6468	1587.85	6903.64	0.2	0.0078	4.695	Asp	16	6	41437.5	2.6473	1588.19	79874	3.45	0.0098	5.8688	Asp	16	8	41443.7	2.6469	1587.91	353772	6.36	0.009	5.4286	Asp	17	5	41432.5	2.6469	1587.95	656227	6.4	0.0086	5.1352	Asp	17	5	41444.2	2.6474	1588.22	1.72657e+06	6.33	0.0093	5.5753	Asp
13	6	41386.8	2.6597	1595.62	10480.2	0.3	0.0078	4.695	Asp	15	6	41384.3	2.6604	1596	142958	6.17	0.013	7.7761	Asp	15	8	41389.1	2.6602	1595.92	621339	11.18	0.0081	4.8417	Asp	16	5	41377.9	2.6603	1595.96	1.13909e+06	11.12	0.0076	4.5483	Asp	16	5	41389.8	2.6607	1596.2	3.03374e+06	11.12	0.0086	5.1352	Asp
12	6	41322.2	2.6755	1605.1	11141.5	0.32	0.0078	4.695	Asp	14	6	41319.5	2.6762	1605.5	146302	6.31	0.0122	7.336	Asp	14	8	41324.9	2.6759	1605.34	647064	11.64	0.0088	5.2819	Asp	15	5	41313.7	2.676	1605.39	1.19756e+06	11.69	0.0078	4.695	Asp	15	5	41325.6	2.6764	1605.63	3.15267e+06	11.55	0.0088	5.2819	Asp
11	6	40867.7	2.7867	1671.78	15015.8	0.43	0.0078	4.695	Asp	13	6	40864.1	2.7876	1672.32	199659	8.61	0.0068	4.1081	Asp	13	8	40849	2.7923	1675.17	782931	14.08	0.0066	3.9614	Asp	14	5	40862	2.7865	1671.66	1.53635e+06	15	0.0081	4.8417	Asp	14	5	40875.5	2.7865	1671.66	4.09508e+06	15	0.0078	4.695	Asp
10	6	40749	2.8157	1689.2	7428.03	0.21	0.0064	3.8147	Asp	12	6	40846.8	2.7918	1674.85	209520	9.04	0.009	5.4286	Asp	12	8	40751.7	2.8161	1689.44	402772	7.24	0.0066	3.9614	Asp	13	5	40838.6	2.7922	1675.09	1.38396e+06	13.5	0.0059	3.5213	Asp	13	5	40853.4	2.7919	1674.91	3.83926e+06	14.06	0.0066	3.9614	Asp
9	5	36401.4	3.879	2327.09	10747.5	0.31	0.0078	4.695	Asp	11	6	40725	2.8216	1692.73	108932	4.7	0.0144	8.6564	Asp	11	8	40729.2	2.8216	1692.75	423534	7.62	0.0071	4.2549	Asp	12	5	40741.6	2.8159	1689.32	740573	7.23	0.0068	4.1081	Asp	12	5	40755.1	2.8159	1689.32	1.95215e+06	7.15	0.0064	3.8147	Asp
8	5	36339.5	3.8941	2336.16	8236.44	0.24	0.0073	4.4016	Asp	10	4	36398	3.8798	2327.59	129321	5.58	0.0064	3.8147	Asp	10	7	36405.4	3.8791	2327.14	549859	9.89	0.0071	4.2549	Asp	11	5	40718.9	2.8215	1692.66	749813	7.32	0.0064	3.8147	Asp	11	5	40733.2	2.8213	1692.53	2.05607e+06	7.53	0.0071	4.2549	Asp
7	5	36312.9	3.9006	2340.07	8496.41	0.25	0.0068	4.1081	Asp	9	4	36378.1	3.8847	2330.51	139342	6.01	0.009	5.4286	Asp	9	7	36382.1	3.8848	2330.55	542764	9.76	0.0081	4.8417	Asp	10	4	36394.8	3.879	2327.08	1.03433e+06	10.09	0.0073	4.4016	Asp	10	4	36407.7	3.8791	2327.17	2.6766e+06	9.81	0.0071	4.2549	Asp
6	4	35975.6	3.9831	2389.55	123351	3.57	0.0181	10.8572	R5	8	4	36337.8	3.8946	2336.42	112845	4.87	0.0064	3.8147	Asp	8	7	36343.1	3.8943	2336.26	462949	8.33	0.0071	4.2549	Asp	9	4	36371	3.8848	2330.58	982743	9.6	0.0078	4.695	Asp	9	4	36384.9	3.8847	2330.51	2.64102e+06	9.68	0.0081	4.8417	Asp
5	3	34666.9	4.3032	2581.56	23715.3	0.69	0.0176	10.5638	R4	7	4	36315	3.9001	2339.77	120444	5.2	0.0098	5.8688	Asp	7	7	36319.3	3.9001	2339.77	463875	8.34	0.0076	4.5483	Asp	8	4	36332.3	3.8943	2336.25	859728	8.39	0.0076	4.5483	Asp	8	4	36345.7	3.8943	2336.27	2.24073e+06	8.21	0.0071	4.2549	Asp
4	3	33954.8	4.4773	2686.04	5564.02	0.16	0.0105	6.3089	R3	6	4	35974	3.9835	2389.79	110608	4.77	0.0196	11.7375	R5	6	7	35980.5	3.983	2389.47	119338	2.15	0.0191	11.4441	R5	7	4	36308.1	3.9002	2339.8	842865	8.23	0.0066	3.9614	Asp	7	4	36322.1	3.9001	2339.73	2.25452e+06	8.26	0.0076	4.5483	Asp
3	2	28093.1	5.9109	3546.07	35748.2	1.03	0.0093	5.5753	R1	5	3	34653.8	4.3064	2583.5	22774	0.98	0.0179	10.7105	R4	5	5	34654.8	4.3072	2583.98	22366.2	0.4	0.0095	5.722	R4	6	4	35966.2	3.9838	2389.97	124123	1.21	0.0188	11.2974	R5	6	4	35987.4	3.9819	2388.83	123706	0.45	0.0205	12.3244	R5
2	2	28051.9	5.921	3552.11	31643.6	0.92	0.0081	4.8417	R1	4	3	33943.6	4.4801	2687.7	4335.33	0.19	0.0112	6.7491	R3	4	5	33966.8	4.4755	2684.92	4164.42	0.07	0.012	7.1892	R3	5	3	34651.4	4.3054	2582.87	23586.8	0.23	0.0181	10.8572	R4	5	3	34658.8	4.3069	2583.77	22808.7	0.08	0.0171	10.2703	R4
1	1	18801.4	8.1833	4909.33	84974.5	2.46	0.0064	3.8147	GMP8	3	2	28091.3	5.9113	3546.33	27743.7	1.2	0.009	5.4286	R1	3	4	28095.7	5.9113	3546.33	32564.9	0.59	0.009	5.4286	R1	4	3	33952.9	4.4762	2685.35	3884.92	0.04	0.0125	7.4827	R3	4	3	33967.7	4.4759	2685.16	4108.68	0.02	0.012	7.1892	R3
										2	2	28052.9	5.9207	3551.97	28052.7	1.21	0.011	6.6024	R1	2	4	28055.3	5.9212	3552.25	30568.9	0.55	0.0086	5.1352	R1	3	2	28084.6	5.9114	3546.35	32939.3	0.32	0.0088	5.2819	R1	3	2	28096.6	5.9117	3546.57	33062.7	0.12	0.009	5.4286	R1
										1	1	18800.2	8.1836	4909.52	67866.2	2.93	0.009	5.4286		1	2	18802.3	8.1842	4909.84	79956.1	1.44	0.0068	4.1081	GMP8	2	2	28043.8	5.9214	3552.34	32043.4	0.31	0.0088	5.2819	R1	2	2	28056.2	5.9216	3552.49	31431.1	0.12	0.009	5.4286	R1
																														1	1	18795.5	8.1832	4909.24	81496	0.8	0.0066	3.9614	GMP8	1	1	18799.4	8.1855	4910.65	81408.6	0.3	0.0068	4.1081	GMP8
										Sample 26	UMP - Asp	1:10	0.1 mM UMP	1 mM Asp	09.12.2022					Sample 27	UMP - Asp	1:25	0.1 mM UMP	2.5 mM Asp	09.12.2022					Sample 16	UMP - Asp	1:50	0.1 mM UMP	5 mM Asp	23.01.2023					Sample 29	UMP - Asp	1:100	0.1 mM UMP	10 mM Asp	09.12.2022
UMP - Asp										Peak	Region	Index (F1)	ν(F1) [ppm]	ν(F1) [Hz]	Intensity [abs]	Intensity [rel]	Half width [ppm]	Half width [Hz]	Annotation	Peak	Region	Index (F1)	ν(F1) [ppm]	ν(F1) [Hz]	Intensity [abs]	Intensity [rel]	Half width [ppm]	Half width [Hz]	Annotation	Peak	Region	Index (F1)	ν(F1) [ppm]	ν(F1) [Hz]	Intensity [abs]	Intensity [rel]	Half width [ppm]	Half width [Hz]	Annotation	Peak	Region	Index (F1)	ν(F1) [ppm]	ν(F1) [Hz]	Intensity [abs]	Intensity [rel]	Half width [ppm]	Half width [Hz]	Annotation
										21	5	52266.7	-0.0001	-0.072	331315	13.21	0.0086	5.1352	DSS	22	7	52258.5	-0.0001	-0.0768	329411	8.36	0.0083	4.9885	DSS	20	6	52266.2	-0.0001	-0.0732	401564	2.97	0.0068	4.1081	DSS	17	7	52259.1	-0.0001	-0.0744	277367	1.14	0.0105	6.3089	DSS
										20	4	41507.1	2.6313	1578.57	29522.3	1.18	0.0088	5.2819	Asp	21	6	41497.8	2.6316	1578.73	171397	4.35	0.0076	4.5483	Asp	19	5	41507.7	2.631	1578.4	392608	2.9	0.0066	3.9614	Asp	16	6	41497.8	2.6317	1578.81	983310	4.04	0.011	6.6024	Asp
										19	4	41441.8	2.6473	1588.15	41463.8	1.65	0.0095	5.722	Asp	20	6	41431.7	2.6477	1588.43	247288	6.28	0.0088	5.2819	Asp	18	5	41442.5	2.647	1587.97	508959	3.76	0.0093	5.5753	Asp	15	6	41428.8	2.6486	1588.94	1.43497e+06	5.9	0.01	6.0155	Asp
										18	4	41388	2.6604	1596.04	69038.9	2.75	0.0098	5.8688	Asp	19	6	41378.5	2.6607	1596.22	418781	10.63	0.009	5.4286	Asp	17	5	41388.1	2.6603	1595.96	948346	7.02	0.0073	4.4016	Asp	14	6	41379.3	2.6607	1596.2	2.37701e+06	9.78	0.0137	8.2163	Asp
										17	4	41323.4	2.6762	1605.52	70370.4	2.8	0.0098	5.8688	Asp	18	6	41313.1	2.6767	1605.82	448805	11.4	0.009	5.4286	Asp	16	5	41323.3	2.6761	1605.46	983274	7.27	0.0081	4.8417	Asp	13	6	41313.6	2.6768	1605.85	2.47186e+06	10.17	0.012	7.1892	Asp
										16	4	40869.3	2.7873	1672.15	96427.1	3.84	0.009	5.4286	Asp	17	6	40860	2.7875	1672.3	590656	15	0.0086	5.1352	Asp	15	5	40871.8	2.7866	1671.71	1.21993e+06	9.02	0.0071	4.2549	Asp	12	6	40854.9	2.7889	1673.14	3.6471e+06	15	0.0159	9.5367	Asp
										15	4	40728.9	2.8216	1692.74	47004.9	1.87	0.0073	4.4016	Asp	16	6	40840	2.7924	1675.23	541901	13.76	0.0061	3.668	Asp	14	5	40849.9	2.7919	1674.92	1.16905e+06	8.65	0.0066	3.9614	Asp	11	6	40731.6	2.8191	1691.23	1.82822e+06	7.52	0.0147	8.8031	Asp
										14	2	36403.3	3.8795	2327.39	67043	2.67	0.0078	4.695	Asp	15	6	40738.7	2.8172	1690.1	291745	7.41	0.0073	4.4016	Asp	13	5	40751.1	2.8161	1689.41	573516	4.24	0.0059	3.5213	Asp	10	5	36384.7	3.8822	2329	2.43124e+06	10	0.0169	10.1236	Asp
										13	2	36381.5	3.8848	2330.59	65282.9	2.6	0.0083	4.9885	Asp	14	6	40720.3	2.8217	1692.8	294678	7.48	0.0066	3.9614	Asp	12	5	40729.6	2.8213	1692.57	631234	4.67	0.0073	4.4016	Asp	9	5	36321	3.8978	2338.35	2.02065e+06	8.31	0.0144	8.6564	Asp
										12	2	36340.7	3.8948	2336.57	53785.3	2.14	0.0066	3.9614	Asp	13	5	36393.1	3.88	2327.68	393769	10	0.0076	4.5483	Asp	11	4	36405.1	3.879	2327.06	776443	5.74	0.0066	3.9614	Asp	8	4	36021.6	3.971	2382.28	48855.7	0.2	0.0274	16.4325	R5
										11	2	36318.9	3.9001	2339.77	53690.2	2.14	0.0081	4.8417	Asp	12	5	36372.3	3.8851	2330.73	377998	9.6	0.0076	4.5483	Asp	10	4	36382.8	3.8844	2330.32	758934	5.61	0.0083	4.9885	Asp	7	4	35873.3	4.0072	2404.03	64408.2	0.26	0.0271	16.2858	R5
										10	2	36021.9	3.9728	2383.35	44918.2	1.79	0.0257	15.4055	R5	11	5	36330.4	3.8953	2336.87	333396	8.46	0.0076	4.5483	Asp	9	4	36342.4	3.8943	2336.26	622281	4.6	0.0066	3.9614	Asp	6	3	34898.8	4.2456	2547.01	31991	0.13	0.0179	10.7105	R4
										9	2	35876	4.0085	2404.75	49536.3	1.97	0.0171	10.2703	R5	10	5	36309.4	3.9004	2339.96	325761	8.27	0.0073	4.4016	Asp	8	4	36319.2	3.8999	2339.65	676913	5.01	0.0081	4.8417	Asp	5	3	34489.2	4.3458	2607.11	18252.8	0.08	0.0203	12.1777	R3
										8	2	35799.2	4.0272	2416.02	22767.8	0.91	0.0144	8.6564	R5	9	4	36011.7	3.9733	2383.63	47056.4	1.19	0.0279	16.726	R5	7	3	34903.3	4.2462	2547.39	32176.3	0.24	0.0157	9.39	R4	4	3	34229.2	4.4093	2645.26	9643.7	0.04	0.0196	11.7375	R2
										7	2	34904.4	4.2461	2547.3	32139.3	1.28	0.0174	10.4171	R4	8	4	35864.5	4.0093	2405.23	52671.4	1.34	0.0183	11.0039	R5	6	3	34489.6	4.3474	2608.09	19503.7	0.14	0.0139	8.363	R3	3	2	27796.8	5.9825	3589.02	43256.9	0.18	0.0179	10.7105	UMP6/R1
										6	2	34491.5	4.3471	2607.89	19280.3	0.77	0.0191	11.4441	R3	7	3	34895.4	4.2463	2547.43	32593	0.83	0.0171	10.2703	R4	5	3	34231.7	4.4105	2645.93	10496.8	0.08	0.0071	4.2549	R2	2	1	19179.7	8.0899	4853.3	40574.4	0.17	0.0103	6.1622	UMP5
										5	2	34237.7	4.4091	2645.12	10761.5	0.43	0.013	7.7761	R2	6	3	34483.1	4.3471	2607.92	19416.5	0.49	0.0181	10.8572	R3	4	2	27856.2	5.9697	3581.33	30034.6	0.22	0.0086	5.1352	UMP6/R1	1	1	19122.6	8.1039	4861.69	39475.4	0.16	0.01	6.0155	UMP5
										4	1	27860.1	5.9689	3580.84	29599.8	1.18	0.0098	5.8688	UMP6/R1	5	3	34229	4.4092	2645.2	10996.6	0.28	0.0103	6.1622	R2	3	2	27798.6	5.9838	3589.8	43749.9	0.32	0.0152	9.0966	UMP6/R1
										3	1	27804.4	5.9825	3589.01	44515.1	1.77	0.0176	10.5638	UMP6/R1	4	2	27851.7	5.9689	3580.87	28649.8	0.73	0.009	5.4286	UMP6/R1	2	1	19171.7	8.0936	4855.52	47360.7	0.35	0.0066	3.9614	UMP5
										2	1	19186.6	8.0901	4853.4	45724.4	1.82	0.0083	4.9885	UMP5	3	2	27798.1	5.982	3588.73	44624.9	1.13	0.0169	10.1236	UMP6/R1	1	1	19114.4	8.1076	4863.93	47445.2	0.35	0.0064	3.8147	UMP5
										1	1	19129.8	8.104	4861.75	43964.4	1.75	0.0078	4.695	UMP5	2	1	19179.5	8.0898	4853.25	47746.8	1.21	0.0073	4.4016	UMP5
																				1	1	19122.6	8.1037	4861.59	48661.6	1.24	0.0073	4.4016	UMP5
[truncated: 50 more columns]

## Sheet: S32 Glycine
1:1										1:10										1:25										1:50										1:100
AMP - Gly
Sample 52	AMP - Gly	1:1	0.1 mM AMP	0.1 mM Gly	02.11.2022					Sample 53	AMP - Gly	1:10	0.1 mM AMP	1 mM Gly	02.11.2022					Sample 54	AMP - Gly	1:25	0.1 mM AMP	2.5 mM Gly	02.11.2022					Sample 55	AMP - Gly	1:50	0.1 mM AMP	5 mM Gly	02.11.2022					Sample 56	AMP - Gly	1:100	0.1 mM AMP	10 mM Gly	02.11.2022
Peak	Region	Index (F1)	ν(F1) [ppm]	ν(F1) [Hz]	Intensity [abs]	Intensity [rel]	Half width [ppm]	Half width [Hz]	Annotation	Peak	Region	Index (F1)	ν(F1) [ppm]	ν(F1) [Hz]	Intensity [abs]	Intensity [rel]	Half width [ppm]	Half width [Hz]	Annotation	Peak	Region	Index (F1)	ν(F1) [ppm]	ν(F1) [Hz]	Intensity [abs]	Intensity [rel]	Half width [ppm]	Half width [Hz]	Annotation	Peak	Region	Index (F1)	ν(F1) [ppm]	ν(F1) [Hz]	Intensity [abs]	Intensity [rel]	Half width [ppm]	Half width [Hz]	Annotation	Peak	Region	Index (F1)	ν(F1) [ppm]	ν(F1) [Hz]	Intensity [abs]	Intensity [rel]	Half width [ppm]	Half width [Hz]	Annotation
9	6	52260.5	-0.0001	-0.072	265227	15	0.0103	6.1622	DSS	9	6	52258.6	-0.0001	-0.0708	229644	15	0.0137	8.2163	DSS	8	6	52265.5	-0.0001	-0.0756	192849	4.48	0.0176	10.5638	DSS	8	6	52265.4	-0.0001	-0.0714	187411	1.53	0.0183	11.0039	DSS	8	6	52268.5	-0.0001	-0.0738	181480	0.65	0.0193	11.5908	DSS
8	5	37757.7	3.5467	2127.76	22324.6	1.26	0.0108	6.4556	Gly	8	5	37753.8	3.5472	2128.06	204684	13.37	0.0142	8.5097	Gly	7	5	37759.2	3.5476	2128.28	645634	15	0.0183	11.0039	Gly	7	5	37758.8	3.5477	2128.33	1.83781e+06	15	0.0201	12.031	Gly	7	5	37762.7	3.5475	2128.2	4.19659e+06	15	0.0198	11.8842	Gly
7	4	35898.9	4.0014	2400.5	111574	6.31	0.0218	13.058	Ribose C5	7	4	35894.6	4.0019	2400.84	114000	7.45	0.0227	13.6449	Ribose C5	6	4	35896.1	4.0032	2401.63	104756	2.43	0.0247	14.8186	RC5	6	4	35900.4	4.0022	2401	109207	0.89	0.0252	15.1121	RC5	6	4	35903.5	4.0022	2400.97	108488	0.39	0.0254	15.2588	RC5
6	3	34466.1	4.3518	2610.71	17518.7	0.99	0.0218	13.058	Ribose C4	6	3	34456	4.3538	2611.91	17797.3	1.17	0.013	7.7761	Ribose C4	5	3	34459.5	4.3546	2612.4	16673.8	0.39	0.0254	15.2588	RC4	5	3	34462.9	4.3537	2611.9	18197.8	0.15	0.0247	14.8186	RC4	5	3	34468.2	4.3532	2611.57	17694.1	0.06	0.0247	14.8186	RC4
5	3	33866.7	4.4984	2698.66	4200.57	0.24	0.0147	8.8031	Ribose C2	5	3	33860.4	4.4994	2699.29	4875.73	0.32	0.0152	9.0966	Ribose C2	4	3	33857.1	4.5019	2700.79	3293.54	0.08	0.0093	5.5753	RC2	4	3	33878	4.4968	2697.72	4095.85	0.03	0.0105	6.3089	RC2	4	3	33877.9	4.4976	2698.18	4209.65	0.02	0.0051	3.0811	RC2
4	2	27233.4	6.1206	3671.88	31285.1	1.77	0.0105	6.3089	Ribose C1	4	2	27228.5	6.1213	3672.31	29271.2	1.9	0.0115	6.8958	Ribose C1	3	2	27207	6.1283	3676.49	26947.8	0.63	0.0259	15.5522	RC1	3	2	27214.6	6.1264	3675.37	29262.5	0.24	0.0259	15.5522	RC1	3	2	27211.9	6.1278	3676.21	30091.7	0.11	0.0259	15.5522	RC1
3	2	27195.3	6.1299	3677.47	31391.6	1.78	0.012	7.1892	Ribose C1	3	2	27193.7	6.1299	3677.43	30203.1	1.98	0.0127	7.6294	Ribose C1	2	1	18502.6	8.2571	4953.59	23731.8	0.55	0.0188	11.2974	AMP 2	2	1	18503	8.257	4953.52	24268.5	0.2	0.0196	11.7375	AMP 2	2	1	18510	8.256	4952.93	23817.1	0.09	0.0215	12.9113	AMP 2
2	1	18503.4	8.2557	4952.74	38369.4	2.17	0.01	6.0155	AMP 2	2	1	18500.7	8.2559	4952.85	32212.9	2.1	0.0139	8.363	AMP 2	1	1	17117.6	8.5958	5156.79	38942.3	0.9	0.0186	11.1507	AMP 8	1	1	17114.8	8.5965	5157.21	40836.6	0.33	0.0186	11.1507	AMP 8	1	1	17117.7	8.5965	5157.21	39875.5	0.14	0.0196	11.7375	AMP 8
1	1	17112.5	8.5958	5156.81	54439.3	3.08	0.0105	6.3089	AMP 8	1	1	17111.1	8.5957	5156.73	49075	3.2	0.0139	8.363	AMP 8
CMP - Gly
Sample 60	CMP - Gly	1:1	0.1 mM CMP	0.1 mM Gly	02.11.2022					Sample 61	CMP - Gly	1:10	0.1 mM CMP	1 mM Gly	02.11.2022					Sample 62	CMP - Gly	1:25	0.1 mM CMP	2.5 mM Gly	02.11.2022					Sample 63	CMP - Gly	1:50	0.1 mM CMP	5 mM Gly	02.11.2022					Sample 64	CMP - Gly	1:100	0.1 mM CMP	10 mM Gly	02.11.2022
Peak	Region	Index (F1)	ν(F1) [ppm]	ν(F1) [Hz]	Intensity [abs]	Intensity [rel]	Half width [ppm]	Half width [Hz]	Annotation	Peak	Region	Index (F1)	ν(F1) [ppm]	ν(F1) [Hz]	Intensity [abs]	Intensity [rel]	Half width [ppm]	Half width [Hz]	Annotation	Peak	Region	Index (F1)	ν(F1) [ppm]	ν(F1) [Hz]	Intensity [abs]	Intensity [rel]	Half width [ppm]	Half width [Hz]	Annotation	Peak	Region	Index (F1)	ν(F1) [ppm]	ν(F1) [Hz]	Intensity [abs]	Intensity [rel]	Half width [ppm]	Half width [Hz]	Annotation	Peak	Region	Index (F1)	ν(F1) [ppm]	ν(F1) [Hz]	Intensity [abs]	Intensity [rel]	Half width [ppm]	Half width [Hz]	Annotation
9	4	52264	-0.0001	-0.0744	179370	15	0.0232	13.9383	DSS	9	4	52270.7	-0.0001	-0.075	150687	2.81	0.0237	14.2318	DSS	9	5	52260	-0.0001	-0.0762	159578	4.8	0.0242	14.5252	DSS	9	5	52260.3	-0.0001	-0.0714	161538	1.59	0.0242	14.5252	DSS	9	4	52263.9	-0.0001	-0.072	170644	0.68	0.0225	13.4982	DSS
8	3	37755.7	3.5481	2128.57	25788	2.16	0.0232	13.9383	Gly	8	3	37763.9	3.5477	2128.35	76471.2	1.43	0.0259	15.5522	Gly	8	4	37750.8	3.5483	2128.7	498464	15	0.0254	15.2588	Gly	8	4	37754	3.5476	2128.27	1.51925e+06	15	0.0245	14.6719	Gly	8	3	37758.1	3.5475	2128.2	3.75515e+06	15	0.023	13.7916	Gly
7	3	35999.2	3.9777	2386.28	39331.4	3.29	0.0362	21.7144	R5	7	2	36004.7	3.9779	2386.45	37856.2	0.71	0.0367	22.0079	R5	7	3	35994.7	3.9778	2386.36	39704.3	1.19	0.0367	22.0079	RC5	7	3	35992.3	3.9784	2386.75	39604.5	0.39	0.0391	23.4751	RC5	7	2	35998.6	3.9778	2386.36	40197.9	0.16	0.0374	22.448	RC5
6	3	35743.5	4.0402	2423.8	38248.4	3.2	0.036	21.5677	RC5	6	2	35753.2	4.0395	2423.36	37114.8	0.69	0.0362	21.7144	RC5	6	3	35734	4.0416	2424.61	37656	1.13	0.0374	22.448	RC5	6	3	35743.3	4.0393	2423.29	39647.4	0.39	0.0384	23.0349	RC5	6	2	35754.5	4.0375	2422.16	39514.7	0.16	0.0367	22.0079	RC5
5	3	34960.4	4.2317	2538.69	31453.5	2.63	0.0259	15.5522	RC4	5	2	34965.6	4.2321	2538.91	28737	0.54	0.0257	15.4055	RC4	5	3	34954.9	4.2321	2538.91	30159.7	0.91	0.0276	16.5793	RC4	5	3	34963.2	4.2301	2537.74	31330.7	0.31	0.0269	16.1391	RC4	5	2	34962.8	4.2311	2538.32	30964.2	0.12	0.0264	15.8457	RC4
4	3	34546.6	4.3329	2599.4	43515.5	3.64	0.0249	14.9654	RC2/3	4	2	34548.7	4.334	2600.07	38478.9	0.72	0.0259	15.5522	RC2/3	4	3	34542.9	4.3329	2599.37	41739.4	1.26	0.0262	15.6989	RC2/3	4	3	34543.4	4.3328	2599.34	43582.3	0.43	0.0257	15.4055	RC3/2	4	2	34547.2	4.3328	2599.3	42823.7	0.17	0.0245	14.6719	RC2/3
3	2	27758.5	5.993	3595.35	27321	2.28	0.0127	7.6294	RC1	3	1	27757.9	5.9948	3596.42	25574.2	0.48	0.0267	15.9924	RC1	3	2	27755.3	5.9929	3595.24	25435.5	0.77	0.0264	15.8457	RC1	3	2	27761.6	5.9914	3594.35	25743.5	0.25	0.0267	15.9924	RC1	3	1	27761.5	5.9923	3594.9	26527.5	0.11	0.0254	15.2588	RC1
2	2	27200.9	6.1294	3677.16	28590.5	2.39	0.0315	18.9268	CMP 5	2	1	27201.6	6.1309	3678.04	28469.4	0.53	0.033	19.8071	CMP 5	2	2	27194.1	6.1301	3677.57	28068.7	0.84	0.033	19.8071	CMP 5	2	2	27199.5	6.1289	3676.83	27979.3	0.28	0.0335	20.1005	CMP 5	2	1	27200.8	6.1294	3677.15	27689.9	0.11	0.032	19.2202	CMP 5
1	1	19164.4	8.0949	4856.27	36437.8	3.05	0.0313	18.78	CMP 6	1	1	19170	8.0951	4856.43	35807.4	0.67	0.0313	18.78	CMP 6	1	1	19160.1	8.0949	4856.31	35498.3	1.07	0.0318	19.0735	CMP 6	1	1	19164.4	8.094	4855.73	35852.3	0.35	0.0315	18.9268	CMP 6	1	1	19168.9	8.0937	4855.59	36029.8	0.14	0.0313	18.78	CMP 6
GMP - Gly
Sample 34	GMP - Gly	1:1	0.1 mM GMP	0.1 mM Gly	13.10.2022					Sample 35	GMP - Gly	1:10	0.1 mM GMP	1 mM Gly	13.10.2022					Sample 36	GMP - Gly	1:25	0.1 mM GMP	2.5 mM Gly	13.10.2022					Sample 37	GMP - Gly	1:50	0.1 mM GMP	5 mM Gly	13.10.2022					Sample 40	GMP - Gly	1:100	0.1 mM GMP	10 mM Gly	13.10.2022
Peak	Region	Index (F1)	ν(F1) [ppm]	ν(F1) [Hz]	Intensity [abs]	Intensity [rel]	Half width [ppm]	Half width [Hz]	Annotation	Peak	Region	Index (F1)	ν(F1) [ppm]	ν(F1) [Hz]	Intensity [abs]	Intensity [rel]	Half width [ppm]	Half width [Hz]	Annotation	Peak	Region	Index (F1)	ν(F1) [ppm]	ν(F1) [Hz]	Intensity [abs]	Intensity [rel]	Half width [ppm]	Half width [Hz]	Annotation	Peak	Region	Index (F1)	ν(F1) [ppm]	ν(F1) [Hz]	Intensity [abs]	Intensity [rel]	Half width [ppm]	Half width [Hz]	Annotation	Peak	Region	Index (F1)	ν(F1) [ppm]	ν(F1) [Hz]	Intensity [abs]	Intensity [rel]	Half width [ppm]	Half width [Hz]	Annotation
8	6	52254.7	-0.0001	-0.072	512912	15	0.0064	3.8147	DSS	8	5	52257.5	-0.0001	-0.0714	405872	4.83	0.009	5.4286	DSS	8	5	52259.3	-0.0001	-0.0738	428171	1.93	0.0086	5.1352	DSS	8	6	52257.5	-0.0001	-0.0744	478934	0.96	0.0073	4.4016	DSS	7	5	52263	-0.0001	-0.072	417674	0.49	0.0081	4.8417	DSS
7	5	37750.9	3.547	2127.91	165011	4.83	0.0061	3.668	Gly	7	4	37753.9	3.5469	2127.88	1.26032e+06	15	0.009	5.4286	Gly	7	4	37755.8	3.5469	2127.86	3.32761e+06	15	0.0083	4.9885	Gly	7	5	37753.8	3.547	2127.9	7.50143e+06	15	0.0073	4.4016	Gly	6	4	37759.2	3.547	2127.92	1.28698e+07	15	0.0078	4.695	Gly
6	4	35964.6	3.9839	2390	84618.5	2.47	0.0176	10.5638	Ribose C5	6	3	35970.3	3.9832	2389.58	88144.6	1.05	0.0181	10.8572	Ribose C5	6	3	35971.1	3.9834	2389.72	90082.3	0.41	0.0179	10.7105	Ribose C5	6	4	35969	3.9835	2389.76	93937.2	0.19	0.0179	10.7105	Ribose C5	5	3	35973.7	3.9837	2389.89	85169.9	0.1	0.0174	10.4171	Ribose C5
5	3	34644.1	4.3068	2583.74	16705.1	0.49	0.0078	4.695	Ribose C4	5	2	34650.1	4.306	2583.27	19559.8	0.23	0.0169	10.1236	Ribose C4	5	2	34652.9	4.3058	2583.12	17333.6	0.08	0.0159	9.5367	Ribose C4	5	3	34658	4.3041	2582.11	19510.6	0.04	0.0164	9.8302	Ribose C4	4	2	34654.1	4.3064	2583.49	14238.1	0.02	0.0142	8.5097	Ribose C4
4	3	33941.1	4.4787	2686.87	2537.52	0.07	0.0103	6.1622	Ribose C3	4	2	33963.4	4.474	2684.02	4592.67	0.05	0.009	5.4286	Ribose C3	4	2	33949	4.4779	2686.39	2802.24	0.01	0.0078	4.695	Ribose C3	4	3	33957.5	4.4754	2684.89	3809.62	0.01	0.0149	8.9499	Ribose C3	3	1	28092	5.9113	3546.29	24877.7	0.03	0.0098	5.8688	Ribose C1
3	2	28084.1	5.9111	3546.21	27352	0.8	0.009	5.4286	Ribose C1	3	1	28086.9	5.9111	3546.21	25088.7	0.3	0.01	6.0155	Ribose C1	3	1	28088.4	5.9112	3546.26	26519.8	0.12	0.01	6.0155	Ribose C1	3	2	28086.8	5.9112	3546.23	28817.7	0.06	0.0093	5.5753	Ribose C1	2	1	28051.4	5.9212	3552.24	23939.3	0.03	0.0088	5.2819	Ribose C1
2	2	28042.4	5.9213	3552.32	23981	0.7	0.0083	4.9885	Ribose C1	2	1	28046.8	5.921	3552.11	22915.9	0.27	0.0093	5.5753	Ribose C1	2	1	28048.2	5.9211	3552.16	23812.3	0.11	0.0088	5.2819	Ribose C1	2	2	28046	5.9212	3552.22	26056.3	0.05	0.0086	5.1352	Ribose C1	1	1	18802.3	8.1832	4909.26	63091	0.07	0.0076	4.5483	GMP H8
1	1	18794	8.1832	4909.24	65425.5	1.92	0.0064	3.8147	GMP H8	1	1	18796.2	8.1833	4909.34	59778.2	0.71	0.0088	5.2819	GMP H8	1	1	18797.7	8.1834	4909.38	63546.9	0.29	0.0078	4.695	GMP H8	1	1	18797.2	8.1831	4909.19	69718.8	0.14	0.0071	4.2549	GMP H8
UMP - Gly
Sample 44	UMP - Gly	1:1	0.1 mM UMP	0.1 mM Gly	02.11.2022					Sample 45	UMP - Gly	1:10	0.1 mM UMP	1 mM Gly	02.11.2022					Sample 46	UMP - Gly	1:25	0.1 mM UMP	2.5 mM Gly	02.11.2022					Sample 47	UMP - Gly	1:50	0.1 mM UMP	5 mM Gly	02.11.2022					Sample 48	UMP - Gly	1:100	0.1 mM UMP	10 mM Gly	26.10.2022
Peak	Region	Index (F1)	ν(F1) [ppm]	ν(F1) [Hz]	Intensity [abs]	Intensity [rel]	Half width [ppm]	Half width [Hz]	Annotation	Peak	Region	Index (F1)	ν(F1) [ppm]	ν(F1) [Hz]	Intensity [abs]	Intensity [rel]	Half width [ppm]	Half width [Hz]	Annotation	Peak	Region	Index (F1)	ν(F1) [ppm]	ν(F1) [Hz]	Intensity [abs]	Intensity [rel]	Half width [ppm]	Half width [Hz]	Annotation	Peak	Region	Index (F1)	ν(F1) [ppm]	ν(F1) [Hz]	Intensity [abs]	Intensity [rel]	Half width [ppm]	Half width [Hz]	Annotation	Peak	Region	Index (F1)	ν(F1) [ppm]	ν(F1) [Hz]	Intensity [abs]	Intensity [rel]	Half width [ppm]	Half width [Hz]	Annotation
9	5	52256.5	-0.0001	-0.0702	170976	15	0.0247	14.8186	DSS	9	4	52260.1	-0.0001	-0.0732	165477	5.27	0.0249	14.9654	DSS	9	4	52257.8	-0.0001	-0.0762	165719	2.21	0.0252	15.1121	DSS	9	4	52257.9	-0.0001	-0.0714	170218	1.05	0.024	14.3785	DSS	12	4	52260.2	-0.0001	-0.0732	404335	0.64	0.0078	4.695	DSS
8	4	37751.4	3.5473	2128.11	27028.9	2.37	0.0252	15.1121	Gly	8	3	37755.4	3.5472	2128.05	470788	15	0.0252	15.1121	Gly	8	3	37753.7	3.5471	2127.95	1.12562e+06	15	0.0254	15.2588	Gly	8	3	37753.8	3.5471	2127.95	2.42583e+06	15	0.024	14.3785	Gly	11	3	37755.1	3.5473	2128.1	9.44347e+06	15	0.0076	4.5483	Gly
7	3	36023.8	3.9698	2381.59	36086.5	3.17	0.0379	22.7415	RC5	7	2	36037.4	3.9674	2380.1	35367.8	1.13	0.0179	10.7105	RC5	7	2	36027.9	3.9691	2381.15	35209.4	0.47	0.0394	23.6218	RC5	7	2	36034.1	3.9676	2380.27	36665.4	0.23	0.0404	24.2087	RC5	10	2	36011.9	3.9737	2383.87	45731.8	0.07	0.0242	14.5252	Ribose C5
6	3	35864.4	4.0088	2404.97	34424.2	3.02	0.0215	12.9113	RC5	6	2	35864	4.0098	2405.55	33129.6	1.06	0.0203	12.1777	RC5	6	2	35857.2	4.0109	2406.2	34589.9	0.46	0.0396	23.7685	RC5	6	2	35871.5	4.0074	2404.13	36084	0.22	0.0394	23.6218	RC5	9	2	35864.1	4.0098	2405.56	53833.2	0.09	0.0152	9.0966	Ribose C5
5	2	34889.1	4.2473	2548.06	25054.1	2.2	0.0259	15.5522	RC4	5	2	34897.6	4.2461	2547.34	23335.5	0.74	0.0259	15.5522	RC4	5	2	34892.6	4.2468	2547.72	23699	0.32	0.0269	16.1391	RC4	5	2	34897.7	4.2456	2547	25311	0.16	0.0257	15.4055	RC4	8	2	35783.6	4.0295	2417.36	23519.9	0.04	0.0152	9.0966	Ribose C5
4	2	34481.2	4.3471	2607.92	15143.7	1.33	0.0262	15.6989	RC3	4	2	34483.2	4.3475	2608.14	14278.6	0.45	0.0154	9.2433	RC3	4	2	34484.2	4.3466	2607.64	14677.2	0.2	0.0152	9.0966	RC3	4	2	34479.1	4.3479	2608.42	15854.3	0.1	0.0259	15.5522	RC3	7	2	34894.9	4.2468	2547.75	36536.2	0.06	0.0161	9.6835	Ribose C4
3	2	34223.5	4.4101	2645.72	8844.28	0.78	0.0245	14.6719	RC2	3	2	34232.1	4.4089	2644.97	6765.04	0.22	0.011	6.6024	RC2	3	2	34231.1	4.4086	2644.78	8480.3	0.11	0.0254	15.2588	RC2	3	2	34228.2	4.4093	2645.23	8882.03	0.05	0.013	7.7761	RC2	6	2	34488.4	4.3462	2607.39	22861.8	0.04	0.0183	11.0039	Ribose C3
2	1	27797.1	5.9818	3588.59	36971.7	3.24	0.0293	17.6063	RC1/UMP6	2	1	27800.4	5.9819	3588.63	36849.4	1.17	0.0303	18.1932	RC1/UMP6	2	1	27799.5	5.9815	3588.41	35839.6	0.48	0.0308	18.4866	RC1/UMP6	2	1	27799.8	5.9815	3588.4	36848.3	0.23	0.0306	18.3399	RC1/UMP6	5	2	34234.2	4.4084	2644.69	12520.8	0.02	0.0125	7.4827	Ribose C2
1	1	19128.1	8.1019	4860.51	30648.3	2.69	0.0335	20.1005	UMP 5	1	1	19132.8	8.1016	4860.33	30982.6	0.99	0.0328	19.6604	UMP 5	1	1	19133.8	8.1008	4859.85	29928.6	0.4	0.0342	20.5407	UMP 5	1	1	19137.7	8.0999	4859.29	31036.2	0.19	0.0333	19.9538	UMP5	4	1	27856.2	5.9682	3580.47	32642.6	0.05	0.0088	5.2819	UMP 6, Ribose C1
																																								3	1	27800.1	5.9819	3588.69	48309.6	0.08	0.009	5.4286	UMP 6, Ribose C1
																																								2	1	19188.8	8.088	4852.14	50976.2	0.08	0.0076	4.5483	UMP H5
																																								1	1	19131	8.1021	4860.62	48990.2	0.08	0.0076	4.5483	UMP H5
[truncated: 30 more columns]

## Sheet: S33 Phenylalanine
1:1										1:10										1:25										1:50										1:100
AMP - Phe
Sample 12+A2:AC31	AMP - Phe	1:1	0.1 mM AMP	0.1 mM Phe	29.11.2022					Sample 13	AMP - Phe	1:10	0.1 mM AMP	1 mM Phe	29.11.2022					Sample 14	AMP - Phe	1:25	0.1 mM AMP	2.5 mM Phe	29.11.2022					Sample 15	AMP - Phe	1:50	0.1 mM AMP	5 mM Phe	02.12.2022					Sample 16	AMP - Phe	1:100	0.1 mM AMP	10 mM Phe	02.12.2022
Peak	Region	Index (F1)	ν(F1) [ppm]	ν(F1) [Hz]	Intensity [abs]	Intensity [rel]	Half width [ppm]	Half width [Hz]	Annotation	Peak	Region	Index (F1)	ν(F1) [ppm]	ν(F1) [Hz]	Intensity [abs]	Intensity [rel]	Half width [ppm]	Half width [Hz]	Annotation	Peak	Region	Index (F1)	ν(F1) [ppm]	ν(F1) [Hz]	Intensity [abs]	Intensity [rel]	Half width [ppm]	Half width [Hz]	Annotation	Peak	Region	Index (F1)	ν(F1) [ppm]	ν(F1) [Hz]	Intensity [abs]	Intensity [rel]	Half width [ppm]	Half width [Hz]	Annotation	Peak	Region	Index (F1)	ν(F1) [ppm]	ν(F1) [Hz]	Intensity [abs]	Intensity [rel]	Half width [ppm]	Half width [Hz]	Annotation
18	8	52261.3	-0.0001	-0.0726	326371	3.44	0.0105	6.3089	DSS	25	8	52255.1	-0.0001	-0.075	444854	6.16	0.0076	4.5483	DSS	24	7	52262.9	-0.0001	-0.072	412807	2.45	0.0083	4.9885	DSS	26	6	52258.1	-0.0001	-0.075	608549	1.53	0.0049	2.9344	DSS	23	6	52263.1	-0.0001	-0.0708	348693	0.57	0.0105	6.3089	DSS
17	7	39635.6	3.0877	1852.37	20475.4	0.22	0.011	6.6024	Phe	24	7	39628	3.088	1852.57	258064	3.58	0.0078	4.695	Phe	23	6	39635	3.0882	1852.69	627004	3.72	0.0088	5.2819	Phe	25	5	39629.2	3.0884	1852.82	1.60246e+06	4.03	0.0059	3.5213	Phe	22	5	39636.4	3.0879	1852.51	2.19221e+06	3.6	0.0112	6.7491	Phe
16	7	39538	3.1116	1866.68	34467.9	0.36	0.0122	7.336	Phe	23	7	39567.3	3.1029	1861.48	295728	4.09	0.0081	4.8417	Phe	22	6	39574	3.1031	1861.64	703548	4.17	0.0086	5.1352	Phe	24	5	39571.6	3.1026	1861.29	1.80644e+06	4.54	0.0073	4.4016	Phe	21	5	39575.2	3.1029	1861.49	2.49198e+06	4.1	0.0071	4.2549	Phe
15	7	39473.2	3.1274	1876.2	35180.1	0.37	0.012	7.1892	Phe	22	7	39527.5	3.1126	1867.31	434674	6.02	0.0098	5.8688	Phe	21	6	39535.2	3.1126	1867.33	1.03423e+06	6.13	0.0103	6.1622	Phe	23	5	39528.9	3.113	1867.55	2.70182e+06	6.8	0.0061	3.668	Phe	20	5	39537.8	3.1121	1866.98	3.78173e+06	6.22	0.0144	8.6564	Phe
14	7	38937.4	3.2584	1954.8	37656.3	0.4	0.0203	12.1777	Phe	21	7	39467.6	3.1273	1876.11	438316	6.07	0.0083	4.9885	Phe	20	6	39475.4	3.1273	1876.11	999849	5.92	0.0093	5.5753	Phe	22	5	39471.6	3.127	1875.96	2.72542e+06	6.85	0.0061	3.668	Phe	19	5	39477.5	3.1268	1875.82	3.55498e+06	5.84	0.0132	7.9228	Phe
13	7	38841.8	3.2818	1968.83	19949.8	0.21	0.011	6.6024	Phe	20	7	38937.3	3.2569	1953.9	439551	6.09	0.0095	5.722	Phe	19	6	38944.7	3.257	1953.96	1.03375e+06	6.12	0.01	6.0155	Phe	21	5	38939	3.2572	1954.09	2.65458e+06	6.68	0.0076	4.5483	Phe	18	5	38945.2	3.257	1953.92	3.72879e+06	6.13	0.0086	5.1352	Phe
12	6	35906.6	3.9997	2399.48	178709	1.88	0.0218	13.058	R5	19	7	38901.5	3.2657	1959.16	399801	5.54	0.0083	4.9885	Phe	18	6	38910.1	3.2655	1959.04	950231	5.63	0.0088	5.2819	Phe	20	5	38902.3	3.2662	1959.47	2.42547e+06	6.1	0.0073	4.4016	Phe	17	5	38917.5	3.2638	1957.99	3.91005e+06	6.43	0.0117	7.0425	Phe
11	5	34468.7	4.3513	2610.44	61934.6	0.65	0.0433	25.9693	R4	18	7	38837.3	3.2814	1968.58	220422	3.05	0.009	5.4286	Phe	17	6	38845.2	3.2814	1968.57	514495	3.05	0.0095	5.722	Phe	19	5	38838.9	3.2817	1968.78	1.34287e+06	3.38	0.0073	4.4016	Phe	16	5	38846.9	3.281	1968.35	1.86678e+06	3.07	0.0083	4.9885	Phe
10	4	33885.3	4.494	2696.04	31543.6	0.33	0.0159	9.5367	R2	17	7	38801.5	3.2902	1973.83	227025	3.14	0.0086	5.1352	Phe	16	6	38809.8	3.29	1973.76	528347	3.13	0.009	5.4286	Phe	18	5	38802.3	3.2907	1974.15	1.37794e+06	3.46	0.0068	4.1081	Phe	15	5	38815.3	3.2887	1972.98	2.12573e+06	3.49	0.0122	7.336	Phe
9	2	27227.3	6.1223	3672.89	39032.2	0.41	0.0203	12.1777	R1	16	6	36032.8	3.9673	2380.04	369300	5.11	0.0088	5.2819	R5	15	5	36040.1	3.9674	2380.13	873147	5.18	0.0093	5.5753	R5	17	5	36032.5	3.9681	2380.53	2.28358e+06	5.74	0.0059	3.5213	R5	14	5	36040	3.9675	2380.17	3.0683e+06	5.04	0.0081	4.8417	R5
8	1	22364.1	7.3117	4386.42	69192.9	0.73	0.0108	6.4556	Phe	15	6	35984.6	3.9791	2387.12	454143	6.29	0.0139	8.363	R5	14	5	35988.8	3.98	2387.65	1.10777e+06	6.56	0.0137	8.2163	R5	16	5	35994.9	3.9773	2386.05	2.39282e+06	6.02	0.0051	3.0811	R5	13	5	35988.7	3.98	2387.69	3.97741e+06	6.54	0.0149	8.9499	R5
7	1	22318	7.3229	4393.18	88180.4	0.93	0.0132	7.9228	Phe	14	6	35934.5	3.9913	2394.47	400110	5.54	0.0161	9.6835	R5	13	5	35946.7	3.9903	2393.83	836184	4.95	0.01	6.0155	R5	15	5	35977.2	3.9816	2388.64	2.29692e+06	5.78	0.0051	3.0811	R5	12	5	35951.8	3.9891	2393.12	3.12019e+06	5.13	0.011	6.6024	R5
6	1	22143.8	7.3656	4418.75	33470.7	0.35	0.0154	9.2433	Phe	13	5	34455.5	4.353	2611.47	26749.6	0.37	0.0154	9.2433	R4	12	4	34461.1	4.3536	2611.8	23170.3	0.14	0.0144	8.6564	R4	14	5	35939.5	3.9908	2394.17	2.10675e+06	5.3	0.0059	3.5213	R5	11	4	34461.6	4.3535	2611.75	29636.2	0.05	0.0186	11.1507	R4
5	1	22099.9	7.3763	4425.19	32791.7	0.35	0.0125	7.4827	Phe	12	4	33852.8	4.5004	2699.89	4703.53	0.07	0.0132	7.9228	R2	11	4	33862.7	4.4999	2699.59	3334.15	0.02	0.0103	6.1622	R2	13	4	34461.7	4.3523	2611.01	29196.2	0.07	0.0147	8.8031	R4	10	4	33863.3	4.4998	2699.53	10155.6	0.02	0.0237	14.2318	R2
4	1	21980.1	7.4056	4442.77	60277.9	0.63	0.0117	7.0425	Phe	11	3	27230.7	6.12	3671.49	47700.7	0.66	0.0088	5.2819	R1	10	3	27240.5	6.1195	3671.2	41196.2	0.24	0.0093	5.5753	R1	12	4	33856.6	4.5002	2699.78	6553.58	0.02	0.013	7.7761	R2	9	3	27221.1	6.1243	3674.07	41384.6	0.07	0.0135	8.0696	R1
3	1	21933.9	7.4169	4449.55	69307.7	0.73	0.0135	8.0696	Phe	10	3	27191.5	6.1295	3677.23	46172.7	0.64	0.0088	5.2819	R1	9	3	27201.8	6.1289	3676.87	43560.8	0.26	0.009	5.4286	R1	11	3	27240.4	6.1183	3670.5	59538.1	0.15	0.0061	3.668	R1	8	2	22365.7	7.3117	4386.45	6.85181e+06	11.26	0.0103	6.1622	Phe
2	1	18505.5	8.2554	4952.55	51619.5	0.54	0.0103	6.1622	AMP2	9	2	22358.8	7.3115	4386.29	834540	11.56	0.0105	6.3089	Phe	8	2	22364.1	7.3121	4386.66	1.92952e+06	11.43	0.0105	6.3089	Phe	10	3	27200.2	6.1282	3676.41	57659.5	0.15	0.0059	3.5213	R1	7	2	22318.3	7.3233	4393.4	9.12767e+06	15	0.0137	8.2163	Phe
1	1	17106.5	8.5975	5157.81	72160	0.76	0.0103	6.1622	AMP8	8	2	22308.1	7.3238	4393.72	1.08313e+06	15	0.0108	6.4556	Phe	7	2	22314.4	7.3242	4393.94	2.53197e+06	15	0.0117	7.0425	Phe	9	2	22363.8	7.311	4385.99	4.62742e+06	11.64	0.0088	5.2819	Phe	6	2	22146.6	7.3653	4418.6	3.42374e+06	5.63	0.0127	7.6294	Phe
										7	2	22139	7.3652	4418.54	407862	5.65	0.011	6.6024	Phe	6	2	22145.9	7.3654	4418.67	956544	5.67	0.0117	7.0425	Phe	8	2	22312.9	7.3234	4393.45	5.96421e+06	15	0.0081	4.8417	Phe	5	2	22102	7.3762	4425.14	3.308e+06	5.44	0.0127	7.6294	Phe
										6	2	22090.9	7.377	4425.59	384023	5.32	0.0105	6.3089	Phe	5	2	22097	7.3774	4425.85	906125	5.37	0.011	6.6024	Phe	7	2	22142.6	7.3651	4418.44	2.36348e+06	5.94	0.0081	4.8417	Phe	4	2	21982.7	7.4054	4442.65	5.92401e+06	9.74	0.0103	6.1622	Phe
										5	2	21975.2	7.4053	4442.57	731305	10.13	0.0103	6.1622	Phe	4	2	21981.4	7.4057	4442.8	1.67902e+06	9.95	0.0105	6.3089	Phe	6	2	22094.1	7.3769	4425.56	2.0991e+06	5.28	0.0083	4.9885	Phe	3	2	21935.1	7.417	4449.62	7.09206e+06	11.66	0.0147	8.8031	Phe
										4	2	21926	7.4173	4449.79	857895	11.88	0.0098	5.8688	Phe	3	2	21932.2	7.4177	4450.02	1.99673e+06	11.83	0.0115	6.8958	Phe	5	2	21979.4	7.405	4442.39	4.21323e+06	10.59	0.0073	4.4016	Phe	2	1	18526.3	8.2507	4949.77	55559.7	0.09	0.0105	6.3089	AMP2
										3	2	21878	7.429	4456.83	292415	4.05	0.0083	4.9885	Phe	2	1	18510.6	8.2545	4952.05	65448.4	0.39	0.0081	4.8417	AMP2	4	2	21928.9	7.4173	4449.81	4.86087e+06	12.23	0.0071	4.2549	Phe	1	1	17121.8	8.5942	5155.83	78852.1	0.13	0.0105	6.3089	AMP8
										2	1	18500.6	8.255	4952.36	73676.4	1.02	0.0073	4.4016	AMP2	1	1	17111.6	8.5966	5157.29	90800	0.54	0.0078	4.695	AMP8	3	2	21879.6	7.4294	4457.04	1.55972e+06	3.92	0.0081	4.8417	Phe
										1	1	17103.9	8.5966	5157.29	103877	1.44	0.0071	4.2549	AMP8											2	1	18511.6	8.2531	4951.18	94463.7	0.24	0.0049	2.9344	AMP2
																														1	1	17116.9	8.5942	5155.81	133033	0.33	0.0051	3.0811	AMP8
CMP - Phe
Sample 17	CMP - Phe	1:1	0.1 mM CMP	0.1 mM Phe	02.12.2022					Sample 18	CMP - Phe	1:10	0.1 mM CMP	1 mM Phe	02.12.2022					Sample 19	CMP - Phe	1:25	0.1 mM CMP	2.5 mM Phe	02.12.2022					Sample 20	CMP - Phe	1:50	0.1 mM CMP	5 mM Phe	02.12.2022					Sample 21	CMP - Phe	1:100	0.1 mM CMP	10 mM Phe	02.12.2022
Peak	Region	Index (F1)	ν(F1) [ppm]	ν(F1) [Hz]	Intensity [abs]	Intensity [rel]	Half width [ppm]	Half width [Hz]	Annotation	Peak	Region	Index (F1)	ν(F1) [ppm]	ν(F1) [Hz]	Intensity [abs]	Intensity [rel]	Half width [ppm]	Half width [Hz]	Annotation	Peak	Region	Index (F1)	ν(F1) [ppm]	ν(F1) [Hz]	Intensity [abs]	Intensity [rel]	Half width [ppm]	Half width [Hz]	Annotation	Peak	Region	Index (F1)	ν(F1) [ppm]	ν(F1) [Hz]	Intensity [abs]	Intensity [rel]	Half width [ppm]	Half width [Hz]	Annotation	Peak	Region	Index (F1)	ν(F1) [ppm]	ν(F1) [Hz]	Intensity [abs]	Intensity [rel]	Half width [ppm]	Half width [Hz]	Annotation
26	5	52257.8	-0.0001	-0.0714	436264	12.56	0.0078	4.695	DSS	25	8	52259.2	-0.0001	-0.0738	379253	6.08	0.0095	5.722	DSS	25	6	52264.8	-0.0001	-0.075	413344	2.54	0.0083	4.9885	DSS	25	6	52262	-0.0001	-0.0738	341785	1.09	0.01	6.0155	DSS	24	7	52261.2	-0.0001	-0.0732	393737	0.62	0.009	5.4286	DSS
25	4	39629.1	3.0884	1852.8	24794.4	0.71	0.0081	4.8417	Phe	24	7	39630.6	3.0884	1852.78	226072	3.62	0.0095	5.722	Phe	24	5	39636.1	3.0884	1852.79	592311	3.64	0.0086	5.1352	Phe	24	5	39633.3	3.0884	1852.8	1.1366e+06	3.63	0.0103	6.1622	Phe	23	6	39632.3	3.0885	1852.83	2.36875e+06	3.73	0.0093	5.5753	Phe
24	4	39569.6	3.103	1861.54	26863.4	0.77	0.0083	4.9885	Phe	23	7	39570.7	3.103	1861.58	254039	4.07	0.0073	4.4016	Phe	23	5	39576.5	3.103	1861.54	664567	4.08	0.0078	4.695	Phe	23	5	39572.3	3.1033	1861.75	1.28715e+06	4.11	0.0061	3.668	Phe	22	6	39572.7	3.103	1861.57	2.65698e+06	4.18	0.0076	4.5483	Phe
23	4	39529.3	3.1128	1867.45	40468.8	1.16	0.0103	6.1622	Phe	22	7	39531.1	3.1127	1867.38	384927	6.17	0.0125	7.4827	Phe	22	5	39536.3	3.1128	1867.44	1.01341e+06	6.23	0.011	6.6024	Phe	22	5	39533.9	3.1127	1867.38	1.90673e+06	6.08	0.0142	8.5097	Phe	21	6	39532.7	3.1128	1867.44	4.01351e+06	6.31	0.012	7.1892	Phe
22	4	39470.5	3.1272	1876.08	39505.3	1.14	0.009	5.4286	Phe	21	7	39471.8	3.1272	1876.08	367736	5.89	0.011	6.6024	Phe	21	5	39477.2	3.1273	1876.1	985262	6.05	0.01	6.0155	Phe	21	5	39474.2	3.1273	1876.13	1.83412e+06	5.85	0.011	6.6024	Phe	20	6	39473.7	3.1272	1876.09	3.83491e+06	6.03	0.0108	6.4556	Phe
21	4	38938.8	3.2573	1954.09	40864.9	1.18	0.0093	5.5753	Phe	20	7	38939.9	3.2573	1954.12	384112	6.15	0.0088	5.2819	Phe	20	5	38945.9	3.2572	1954.06	1.01091e+06	6.21	0.009	5.4286	Phe	20	5	38942	3.2575	1954.22	1.92514e+06	6.14	0.0083	4.9885	Phe	19	6	38941.4	3.2574	1954.19	3.98795e+06	6.27	0.009	5.4286	Phe
20	4	38904	3.2658	1959.19	37545.8	1.08	0.009	5.4286	Phe	19	7	38909.1	3.2648	1958.64	376299	6.03	0.0108	6.4556	Phe	19	5	38912.4	3.2654	1958.98	972445	5.97	0.0098	5.8688	Phe	19	5	38919.7	3.2629	1957.5	1.88792e+06	6.02	0.0117	7.0425	Phe	18	6	38909.4	3.2653	1958.89	3.88497e+06	6.11	0.0103	6.1622	Phe
19	4	38839.3	3.2816	1968.68	20192.1	0.58	0.0086	5.1352	Phe	18	7	38840.6	3.2816	1968.7	189338	3.03	0.009	5.4286	Phe	18	5	38846.3	3.2816	1968.67	512016	3.15	0.0098	5.8688	Phe	18	5	38843	3.2817	1968.75	957884	3.06	0.0088	5.2819	Phe	17	6	38842.1	3.2817	1968.76	1.97311e+06	3.1	0.0095	5.722	Phe
18	4	38804.1	3.2902	1973.85	21136.3	0.61	0.0095	5.722	Phe	17	7	38807.5	3.2897	1973.54	208190	3.33	0.0112	6.7491	Phe	17	5	38811.7	3.29	1973.75	546124	3.36	0.0103	6.1622	Phe	17	5	38812.9	3.2891	1973.17	1.02562e+06	3.27	0.0122	7.336	Phe	16	6	38808.2	3.29	1973.73	2.16195e+06	3.4	0.0108	6.4556	Phe
17	3	36031.9	3.9682	2380.59	61753.9	1.78	0.0132	7.9228	R5	16	6	36033.6	3.9681	2380.54	340945	5.46	0.0086	5.1352	R5	16	5	36039.4	3.968	2380.49	854344	5.25	0.0086	5.1352	R5	16	5	36035.3	3.9684	2380.69	1.61379e+06	5.15	0.0078	4.695	R5	15	6	36034.7	3.9683	2380.66	3.33746e+06	5.25	0.0083	4.9885	R5
16	3	35981.8	3.9804	2387.93	91741.8	2.64	0.021	12.6178	R5	15	6	35981.6	3.9808	2388.17	440683	7.06	0.0149	8.9499	R5	15	5	35987.9	3.9806	2388.05	1.07103e+06	6.58	0.0142	8.5097	R5	15	5	35983	3.9811	2388.36	2.13026e+06	6.8	0.0149	8.9499	R5	14	6	35981.8	3.9812	2388.42	4.13346e+06	6.5	0.0144	8.6564	R5
15	3	35754.2	4.0361	2421.33	57820.6	1.66	0.0149	8.9499	R5	14	6	35943.2	3.9902	2393.79	319767	5.12	0.0098	5.8688	R5	14	5	35947.7	3.9905	2393.96	811138	4.98	0.0095	5.722	R5	14	5	35944.4	3.9906	2394.03	1.50543e+06	4.8	0.0108	6.4556	R5	13	6	35943.3	3.9906	2394.06	3.17532e+06	4.99	0.0098	5.8688	R5
14	3	35675.1	4.0554	2432.93	29625	0.85	0.0149	8.9499	R5	13	5	34957.5	4.2313	2538.42	40767.7	0.65	0.0171	10.2703	R4	13	4	34962.5	4.2314	2538.49	51284.4	0.32	0.0181	10.8572	R4	13	4	34959.9	4.2314	2538.47	42143.3	0.13	0.0164	9.8302	R4	12	5	34958.3	4.2315	2538.59	42398	0.07	0.0176	10.5638	R4
13	3	34957.5	4.2309	2538.22	44305.8	1.27	0.0161	9.6835	R4	12	4	34536.6	4.3342	2600.17	63188.8	1.01	0.0139	8.363	R2/3	12	4	34542.5	4.3341	2600.12	76291.4	0.47	0.0139	8.363	R2/3	12	4	34543	4.3333	2599.64	67842.2	0.22	0.0137	8.2163	R2/3	11	5	34543.9	4.3329	2599.38	65190.7	0.1	0.0139	8.363	R2/3
12	3	34534.8	4.3343	2600.24	69040.8	1.99	0.013	7.7761	R2/3	11	3	27751.4	5.9936	3595.69	40596.2	0.65	0.0139	8.363	R1	11	3	27758.3	5.9933	3595.49	49027.8	0.3	0.013	7.7761	R1	11	3	27757.2	5.9929	3595.25	45440.2	0.14	0.0137	8.2163	R1	10	3	27759	5.9922	3594.86	40954.9	0.06	0.0135	8.0696	R1
11	2	27749.3	5.9938	3595.81	46786.2	1.35	0.0127	7.6294	R1	10	3	27226.5	6.122	3672.7	38747.5	0.62	0.0098	5.8688	CMP5	10	3	27232.8	6.1218	3672.59	46444	0.29	0.0088	5.2819	CMP5	10	3	27232	6.1213	3672.31	38722.1	0.12	0.0108	6.4556	CMP5	9	3	27233.6	6.1207	3671.95	38476.9	0.06	0.01	6.0155	CMP5
10	2	27224	6.1223	3672.87	46129.9	1.33	0.0083	4.9885	CMP5	9	3	27171.2	6.1355	3680.82	32680.4	0.52	0.0115	6.8958	CMP5	9	3	27177.9	6.1352	3680.65	40950.8	0.25	0.0095	5.722	CMP5	9	3	27176.4	6.1349	3680.46	33720.8	0.11	0.0115	6.8958	CMP5	8	3	27178.6	6.1342	3680.02	32304.5	0.05	0.0112	6.7491	CMP5
9	2	27169.1	6.1357	3680.93	39796.3	1.15	0.0088	5.2819	CMP6	8	2	22362	7.3117	4386.42	708828	11.36	0.0103	6.1622	Phe	8	2	22368.3	7.3115	4386.3	1.84605e+06	11.34	0.0105	6.3089	Phe	8	2	22363.7	7.3119	4386.58	3.57555e+06	11.4	0.0108	6.4556	Phe	7	2	22364.3	7.3116	4386.36	7.24748e+06	11.4	0.0103	6.1622	Phe
8	1	22360.9	7.3116	4386.39	80841.6	2.33	0.0105	6.3089	Phe	7	2	22313.3	7.3236	4393.56	936419	15	0.0127	7.6294	Phe	7	2	22319	7.3236	4393.55	2.44096e+06	15	0.0122	7.336	Phe	7	2	22316.2	7.3236	4393.55	4.70232e+06	15	0.0127	7.6294	Phe	6	2	22144.3	7.3654	4418.65	3.60898e+06	5.68	0.012	7.1892	Phe
7	1	22311.2	7.3238	4393.68	105474	3.04	0.0117	7.0425	Phe	6	2	22142.4	7.3654	4418.64	353843	5.67	0.0122	7.336	Phe	6	2	22148.4	7.3653	4418.58	926187	5.69	0.0115	6.8958	Phe	6	2	22144.8	7.3655	4418.7	1.79525e+06	5.73	0.0127	7.6294	Phe	5	2	22097	7.377	4425.59	3.3882e+06	5.33	0.0117	7.0425	Phe
6	1	22141.2	7.3653	4418.62	41322.2	1.19	0.0112	6.7491	Phe	5	2	22095.5	7.3769	4425.52	333245	5.34	0.0117	7.0425	Phe	5	2	22100.7	7.3769	4425.57	872937	5.36	0.0115	6.8958	Phe	5	2	22097.1	7.3771	4425.7	1.67957e+06	5.36	0.0117	7.0425	Phe	4	2	21980.7	7.4054	4442.65	6.31437e+06	9.93	0.0103	6.1622	Phe
5	1	22093.2	7.3771	4425.65	38350.9	1.1	0.011	6.6024	Phe	4	2	21978.8	7.4054	4442.64	619859	9.93	0.0105	6.3089	Phe	4	2	21984.8	7.4053	4442.58	1.62225e+06	9.97	0.0103	6.1622	Phe	4	2	21981.1	7.4055	4442.71	3.11475e+06	9.94	0.011	6.6024	Phe	3	2	21931.6	7.4174	4449.86	7.43095e+06	11.68	0.0127	7.6294	Phe
4	1	21977.9	7.4053	4442.58	72533.1	2.09	0.0105	6.3089	Phe	3	2	21929.9	7.4174	4449.82	730843	11.71	0.013	7.7761	Phe	3	2	21935.6	7.4173	4449.79	1.91545e+06	11.77	0.0122	7.336	Phe	3	2	21931.5	7.4176	4449.99	3.65956e+06	11.67	0.0127	7.6294	Phe	2	1	19202.9	8.0848	4850.21	47818.1	0.08	0.0095	5.722	CMP6
3	1	21928.1	7.4175	4449.88	83479.3	2.4	0.0112	6.7491	Phe	2	1	19191.1	8.0872	4851.65	47821.7	0.77	0.0098	5.8688	CMP6	2	1	19197.1	8.0871	4851.59	58089.8	0.36	0.0081	4.8417	CMP6	2	1	19199	8.0859	4850.9	49632.7	0.16	0.01	6.0155	CMP6	1	1	19149.3	8.0979	4858.07	48246.3	0.08	0.0093	5.5753	CMP6
2	1	19188.2	8.0875	4851.88	57700.6	1.66	0.0076	4.5483	CMP6	1	1	19137.6	8.1002	4859.5	48654.9	0.78	0.0095	5.722	CMP6	1	1	19143.5	8.1002	4859.44	58910.4	0.36	0.0083	4.9885	CMP6	1	1	19145.5	8.099	4858.75	50983.3	0.16	0.0098	5.8688	CMP6
1	1	19134.6	8.1007	4859.74	58414.8	1.68	0.0078	4.695	CMP6


GMP - Phe
Sample 22	GMP - Phe	1:1	0.1 mM GMP	0.1 mM Phe	02.12.2022					Sample 23	GMP - Phe	1:10	0.1 mM GMP	1 mM Phe	02.12.2022					Sample 24	GMP - Phe	1:25	0.1 mM GMP	2.5 mM Phe	02.12.2022					Sample 25	GMP - Phe	1:50	0.1 mM GMP	5 mM Phe	02.12.2022					Sample 26	GMP - Phe	1:100	0.1 mM GMP	10 mM Phe	02.12.2022
Peak	Region	Index (F1)	ν(F1) [ppm]	ν(F1) [Hz]	Intensity [abs]	Intensity [rel]	Half width [ppm]	Half width [Hz]	Annotation	Peak	Region	Index (F1)	ν(F1) [ppm]	ν(F1) [Hz]	Intensity [abs]	Intensity [rel]	Half width [ppm]	Half width [Hz]	Annotation	Peak	Region	Index (F1)	ν(F1) [ppm]	ν(F1) [Hz]	Intensity [abs]	Intensity [rel]	Half width [ppm]	Half width [Hz]	Annotation	Peak	Region	Index (F1)	ν(F1) [ppm]	ν(F1) [Hz]	Intensity [abs]	Intensity [rel]	Half width [ppm]	Half width [Hz]	Annotation	Peak	Region	Index (F1)	ν(F1) [ppm]	ν(F1) [Hz]	Intensity [abs]	Intensity [rel]	Half width [ppm]	Half width [Hz]	Annotation
18	6	52261.8	-0.0001	-0.0732	406638	11.4	0.0081	4.8417	DSS	22	6	52258.2	-0.0001	-0.0726	470442	7.03	0.0076	4.5483	DSS	19	10	52263.8	-0.0001	-0.072	440675	2.48	0.0078	4.695	DSS	20	6	52263.3	-0.0001	-0.0738	361752	1.17	0.0105	6.3089	DSS	21	6	52266.9	-0.0001	-0.075	446570	0.71	0.0078	4.695	DSS
17	5	39632.9	3.0884	1852.82	7104.82	0.2	0.0081	4.8417	Phe	21	5	39628.3	3.0887	1852.97	246102	3.68	0.0078	4.695	Phe	18	9	39633.9	3.0887	1852.97	666727	3.75	0.0083	4.9885	Phe	19	5	39637.5	3.0877	1852.38	1.10538e+06	3.57	0.0103	6.1622	Phe	20	5	39638.1	3.0884	1852.81	2.33088e+06	3.72	0.0086	5.1352	Phe
16	5	39573.2	3.1031	1861.59	8158.85	0.23	0.0086	5.1352	Phe	20	5	39569.3	3.1031	1861.63	273880	4.09	0.0081	4.8417	Phe	17	9	39574.7	3.1032	1861.66	746405	4.2	0.0083	4.9885	Phe	18	5	39576.6	3.1026	1861.3	1.23864e+06	4	0.0071	4.2549	Phe	19	5	39578.7	3.103	1861.52	2.61294e+06	4.17	0.0078	4.695	Phe
15	5	39531.2	3.1133	1867.75	12529.6	0.35	0.0108	6.4556	Phe	19	5	39528.2	3.1132	1867.66	413629	6.18	0.01	6.0155	Phe	16	9	39533.9	3.1132	1867.65	1.10604e+06	6.22	0.0103	6.1622	Phe	17	5	39538.5	3.1119	1866.9	1.89114e+06	6.11	0.013	7.7761	Phe	18	5	39538.1	3.1129	1867.48	3.93843e+06	6.29	0.0108	6.4556	Phe
14	5	39474.8	3.1271	1876.02	11785.4	0.33	0.0093	5.5753	Phe	18	5	39469.8	3.1275	1876.24	403568	6.03	0.0088	5.2819	Phe	15	9	39475.2	3.1275	1876.25	1.07592e+06	6.05	0.0093	5.5753	Phe	16	5	39478.3	3.1266	1875.73	1.78307e+06	5.76	0.0115	6.8958	Phe	17	5	39479.4	3.1273	1876.1	3.83747e+06	6.13	0.0095	5.722	Phe
13	5	38942.6	3.2573	1954.1	12705.6	0.36	0.0098	5.8688	Phe	17	5	38938	3.2575	1954.26	411833	6.15	0.0093	5.5753	Phe	14	9	38943.5	3.2575	1954.27	1.10631e+06	6.22	0.0093	5.5753	Phe	15	5	38947.4	3.2565	1953.63	1.83999e+06	5.95	0.0088	5.2819	Phe	16	5	38947.7	3.2573	1954.1	3.95926e+06	6.32	0.009	5.4286	Phe
12	5	38909.1	3.2655	1959.02	11614.9	0.33	0.01	6.0155	Phe	16	5	38902.7	3.2662	1959.44	384013	5.74	0.0088	5.2819	Phe	13	7	36036.8	3.9684	2380.74	929197	5.23	0.0086	5.1352	R5/Phe	14	5	38916.1	3.2641	1958.22	1.90136e+06	6.14	0.011	6.6024	Phe	15	5	38913.3	3.2657	1959.15	3.70333e+06	5.91	0.0093	5.5753	Phe
11	5	38806	3.2907	1974.14	6404.53	0.18	0.0093	5.5753	Phe	15	5	38838.2	3.2819	1968.89	206246	3.08	0.0086	5.1352	Phe	12	7	35983.9	3.9814	2388.49	1.12461e+06	6.32	0.0142	8.5097	R5/Phe	13	5	38848.3	3.2807	1968.16	948724	3.07	0.009	5.4286	Phe	14	5	38847.9	3.2817	1968.76	1.97955e+06	3.16	0.0086	5.1352	Phe
10	4	35979.2	3.982	2388.89	32393.1	0.91	0.0149	8.9499	R5	14	5	38802.4	3.2907	1974.15	216309	3.23	0.0093	5.5753	Phe	11	7	35944.4	3.991	2394.3	857714	4.82	0.009	5.4286	R5/Phe	12	5	38815	3.2889	1973.05	1.04498e+06	3.38	0.011	6.6024	Phe	13	5	38812.8	3.2903	1973.9	2.07693e+06	3.32	0.0098	5.8688	Phe
9	3	34648.3	4.3075	2584.16	4072.46	0.11	0.0095	5.722	R3	13	5	36031.3	3.9684	2380.73	347530	5.19	0.0086	5.1352	R5/Phe	10	3	28097.6	5.9101	3545.57	5817.52	0.03	0.0086	5.1352	R1	11	5	36040.1	3.9675	2380.18	1.56002e+06	5.04	0.0081	4.8417	R5/Phe	12	5	36041.3	3.9681	2380.53	3.2523e+06	5.19	0.0086	5.1352	R5/Phe
8	2	28049.7	5.9213	3552.3	6205.44	0.17	0.0125	7.4827	R1	12	5	35978.3	3.9814	2388.5	432843	6.47	0.0142	8.5097	R5/Phe	9	3	28055.8	5.9203	3551.7	6363.92	0.04	0.01	6.0155	R1	10	5	35987.8	3.9803	2387.85	2.00717e+06	6.49	0.0147	8.8031	R5/Phe	11	5	35988.5	3.981	2388.27	3.93109e+06	6.27	0.0139	8.363	R5/Phe
7	1	22365.1	7.3116	4386.35	24428.1	0.68	0.0103	6.1622	Phe	11	5	35938.8	3.991	2394.3	330010	4.93	0.0088	5.2819	R5/Phe	8	2	22366.6	7.3117	4386.42	2.02371e+06	11.38	0.0103	6.1622	Phe	9	5	35949.8	3.9896	2393.43	1.53843e+06	4.97	0.0103	6.1622	R5/Phe	10	5	35948.8	3.9907	2394.1	3.01974e+06	4.82	0.0095	5.722	R5/Phe
6	1	22316.8	7.3234	4393.43	31470.7	0.88	0.012	7.1892	Phe	10	4	34649.7	4.3063	2583.43	2750.65	0.04	0.0066	3.9614	R4	7	2	22316.7	7.3239	4393.74	2.66792e+06	15	0.0117	7.0425	Phe	8	4	34654.4	4.3064	2583.49	6720.98	0.02	0.0213	12.7646	R4	9	3	28107.9	5.9083	3544.52	5408.38	0.01	0.0093	5.5753	R1
5	1	22145.5	7.3653	4418.56	12111.1	0.34	0.0117	7.0425	Phe	9	3	28089.7	5.9106	3545.92	6989.08	0.1	0.01	6.0155	R1	6	2	22146.6	7.3655	4418.7	1.02055e+06	5.74	0.0115	6.8958	Phe	7	4	33958.1	4.4767	2685.64	2778.25	0.01	0.0098	5.8688	R3	8	2	22370.3	7.3115	4386.33	7.12331e+06	11.37	0.0103	6.1622	Phe
4	1	22099.1	7.3766	4425.37	11431.9	0.32	0.0108	6.4556	Phe	8	3	28048.3	5.9208	3551.99	5853.74	0.09	0.0083	4.9885	R1	5	2	22098.5	7.3772	4425.76	953907	5.36	0.011	6.6024	Phe	6	3	28100.9	5.9091	3545.01	4344.25	0.01	0.009	5.4286	R1	7	2	22320.5	7.3237	4393.64	9.3972e+06	15	0.012	7.1892	Phe
3	1	21982.5	7.4051	4442.47	20320.5	0.57	0.01	6.0155	Phe	7	2	22361.4	7.3116	4386.36	765669	11.44	0.0105	6.3089	Phe	4	2	21983.1	7.4055	4442.69	1.78947e+06	10.06	0.0103	6.1622	Phe	5	2	22368.6	7.3111	4386.05	3.45046e+06	11.15	0.0105	6.3089	Phe	6	2	22150	7.3654	4418.65	3.58975e+06	5.73	0.0117	7.0425	Phe
2	1	21932.3	7.4174	4449.84	24765.4	0.69	0.0122	7.336	Phe	6	2	22311.3	7.3238	4393.71	1.0042e+06	15	0.0115	6.8958	Phe	3	2	21933.5	7.4176	4449.97	2.11586e+06	11.9	0.0115	6.8958	Phe	4	2	22319.8	7.323	4393.2	4.64169e+06	15	0.013	7.7761	Phe	5	2	22102.1	7.3771	4425.68	3.34997e+06	5.35	0.011	6.6024	Phe
1	1	18795.3	8.1846	4910.11	11735.8	0.33	0.0073	4.4016	GMP8	5	2	22141.5	7.3654	4418.62	383639	5.73	0.0112	6.7491	Phe	2	2	21886.2	7.4292	4456.91	765526	4.3	0.0078	4.695	Phe	3	2	21985.1	7.4048	4442.32	3.03086e+06	9.8	0.0105	6.3089	Phe	4	2	21986.5	7.4054	4442.64	6.29607e+06	10.05	0.0105	6.3089	Phe
										4	2	22092.9	7.3772	4425.75	357184	5.34	0.0108	6.4556	Phe	1	1	18799.6	8.184	4909.77	14486.8	0.08	0.0071	4.2549	GMP8	2	2	21937.7	7.4164	4449.27	3.63007e+06	11.73	0.0132	7.9228	Phe	3	2	21937.1	7.4175	4449.88	7.4001e+06	11.81	0.0115	6.8958	Phe
										3	2	21977.9	7.4054	4442.62	677024	10.12	0.0105	6.3089	Phe											1	1	18803.3	8.183	4909.15	11308.3	0.04	0.0088	5.2819	GMP8	2	2	21890.1	7.429	4456.78	2.66282e+06	4.25	0.0078	4.695	Phe
										2	2	21928.3	7.4175	4449.91	794658	11.87	0.011	6.6024	Phe																					1	1	18808.2	8.1827	4908.96	13817.9	0.02	0.0068	4.1081	GMP8
										1	1	18793.8	8.1841	4909.8	13909.6	0.21	0.0076	4.5483	GMP8




UMP - Phe
Sample 27	UMP - Phe	1:1	0.1 mM UMP	0.1 mM Phe	02.12.2022					Sample 28	UMP - Phe	1:10	0.1 mM UMP	1 mM Phe	02.12.2022					Sample 29	UMP - Phe	1:25	0.1 mM UMP	2.5 mM Phe	02.12.2022					Sample 30	UMP - Phe	1:50	0.1 mM UMP	5 mM Phe	02.12.2022					Sample 31	UMP - Phe	1:100	0.1 mM UMP	10 mM Phe	02.12.2022
Peak	Region	Index (F1)	ν(F1) [ppm]	ν(F1) [Hz]	Intensity [abs]	Intensity [rel]	Half width [ppm]	Half width [Hz]	Annotation	Peak	Region	Index (F1)	ν(F1) [ppm]	ν(F1) [Hz]	Intensity [abs]	Intensity [rel]	Half width [ppm]	Half width [Hz]	Annotation	Peak	Region	Index (F1)	ν(F1) [ppm]	ν(F1) [Hz]	Intensity [abs]	Intensity [rel]	Half width [ppm]	Half width [Hz]	Annotation	Peak	Region	Index (F1)	ν(F1) [ppm]	ν(F1) [Hz]	Intensity [abs]	Intensity [rel]	Half width [ppm]	Half width [Hz]	Annotation	Peak	Region	Index (F1)	ν(F1) [ppm]	ν(F1) [Hz]	Intensity [abs]	Intensity [rel]	Half width [ppm]	Half width [Hz]	Annotation
26	6	52258.7	-0.0001	-0.0714	396358	12.55	0.0098	5.8688	DSS	26	6	52261.5	-0.0001	-0.0726	395625	6.35	0.0095	5.722	DSS	27	6	52260.3	-0.0001	-0.075	557079	2.98	0.0059	3.5213	DSS	24	6	52270.7	-0.0001	-0.0738	384636	1.19	0.0083	4.9885	DSS	25	6	52266.6	-0.0001	-0.0744	410962	0.63	0.009	5.4286	DSS
25	5	39631.6	3.088	1852.58	25509.9	0.81	0.0103	6.1622	Phe	25	5	39633.5	3.0883	1852.71	222459	3.57	0.01	6.0155	Phe	26	5	39632	3.0883	1852.74	722943	3.87	0.0066	3.9614	Phe	23	5	39642.7	3.0882	1852.7	1.17936e+06	3.63	0.009	5.4286	Phe	24	5	39638.3	3.0883	1852.74	2.37426e+06	3.65	0.0095	5.722	Phe
24	5	39531.6	3.1125	1867.25	41611.2	1.32	0.0127	7.6294	Phe	24	5	39574.4	3.1027	1861.37	248451	3.99	0.0068	4.1081	Phe	25	5	39573.7	3.1026	1861.29	812012	4.34	0.0078	4.695	Phe	22	5	39582.6	3.1029	1861.51	1.347e+06	4.15	0.0081	4.8417	Phe	23	5	39577.7	3.1031	1861.63	2.65024e+06	4.07	0.0081	4.8417	Phe
23	5	39471.9	3.1271	1876	39474	1.25	0.0108	6.4556	Phe	23	5	39534.1	3.1126	1867.28	385198	6.18	0.0135	8.0696	Phe	24	5	39531.6	3.1129	1867.46	1.21749e+06	6.5	0.0071	4.2549	Phe	21	5	39543.1	3.1126	1867.31	2.01455e+06	6.21	0.011	6.6024	Phe	22	5	39538.6	3.1127	1867.37	4.00629e+06	6.15	0.0112	6.7491	Phe
22	5	38940.5	3.257	1953.96	42748.9	1.35	0.0093	5.5753	Phe	22	5	39475.4	3.1269	1875.9	365884	5.87	0.0117	7.0425	Phe	23	5	39473.8	3.127	1875.95	1.21369e+06	6.48	0.0071	4.2549	Phe	20	5	39483.7	3.1271	1876.02	1.96503e+06	6.05	0.0103	6.1622	Phe	21	5	39478.9	3.1273	1876.12	3.8501e+06	5.92	0.0103	6.1622	Phe
21	5	38914.4	3.2634	1957.81	40776	1.29	0.0108	6.4556	Phe	21	5	38943.1	3.2571	1954	379006	6.08	0.0083	4.9885	Phe	22	5	38941.9	3.2571	1953.99	1.21043e+06	6.47	0.0088	5.2819	Phe	19	5	38952.7	3.257	1953.94	1.97414e+06	6.08	0.009	5.4286	Phe	20	5	38947.8	3.2572	1954.04	4.02301e+06	6.18	0.009	5.4286	Phe
20	5	38842	3.2811	1968.42	21519.5	0.68	0.0093	5.5753	Phe	20	5	38911	3.2649	1958.71	386596	6.2	0.0112	6.7491	Phe	21	5	38905.4	3.266	1959.34	1.10074e+06	5.88	0.0078	4.695	Phe	18	5	38919.4	3.2651	1958.82	1.93189e+06	5.95	0.0098	5.8688	Phe	19	5	38915.8	3.265	1958.74	3.83681e+06	5.89	0.0103	6.1622	Phe
19	5	38807.4	3.2896	1973.49	22752.4	0.72	0.0112	6.7491	Phe	19	5	38843.9	3.2814	1968.55	193892	3.11	0.0088	5.2819	Phe	20	5	38841.7	3.2816	1968.68	606270	3.24	0.0083	4.9885	Phe	17	5	38853.3	3.2813	1968.51	1.03697e+06	3.19	0.01	6.0155	Phe	18	5	38848.3	3.2815	1968.64	2.00577e+06	3.08	0.0088	5.2819	Phe
18	4	36030.8	3.9687	2380.88	109563	3.47	0.023	13.7916	R5/Phe	18	5	38810.3	3.2896	1973.48	216047	3.47	0.0112	6.7491	Phe	19	5	38805.2	3.2905	1974.04	622042	3.32	0.0081	4.8417	Phe	16	5	38818.7	3.2898	1973.59	1.092e+06	3.36	0.01	6.0155	Phe	17	5	38814.5	3.2898	1973.6	2.13745e+06	3.28	0.011	6.6024	Phe
17	4	35996.9	3.977	2385.85	107551	3.4	0.0108	6.4556	R5/Phe	17	5	36037.3	3.9677	2380.33	357030	5.73	0.0081	4.8417	R5/Phe	18	5	36036.1	3.9677	2380.33	1.06931e+06	5.72	0.0083	4.9885	R5/Phe	15	5	36046.3	3.9678	2380.36	1.69794e+06	5.23	0.0088	5.2819	R5/Phe	16	5	36041.6	3.9679	2380.44	3.34207e+06	5.13	0.0086	5.1352	R5/Phe
16	4	35942.2	3.9903	2393.88	71594	2.27	0.01	6.0155	R5/Phe	16	5	35999.4	3.977	2385.89	409724	6.57	0.0076	4.5483	R5/Phe	17	5	35997.8	3.9771	2385.94	1.12271e+06	6	0.0059	3.5213	R5/Phe	14	5	35997.3	3.9798	2387.55	2065559	6.36	0.0142	8.5097	R5/Phe	15	5	35989.9	3.9806	2388.03	4.28192e+06	6.58	0.0142	8.5097	R5/Phe
15	4	35879.6	4.0056	2403.05	89890.1	2.85	0.0232	13.9383	R5/Phe	15	5	35984.2	3.9807	2388.12	422751	6.78	0.0076	4.5483	R5/Phe	16	5	35982.7	3.9808	2388.16	1.1157e+06	5.96	0.0061	3.668	R5/Phe	13	5	35954.4	3.9903	2393.84	1.62779e+06	5.01	0.0098	5.8688	R5/Phe	14	5	35949.6	3.9904	2393.94	3.08829e+06	4.74	0.01	6.0155	R5/Phe
14	4	35799.2	4.0253	2414.86	60132.5	1.9	0.0254	15.2588	R5/Phe	14	5	35947	3.9898	2393.59	324268	5.2	0.0108	6.4556	R5/Phe	15	5	35943.1	3.9905	2393.97	929415	4.97	0.0078	4.695	R5/Phe	12	4	34909.4	4.2458	2547.16	73790.5	0.23	0.0548	32.8651	R4	13	4	34901.7	4.2467	2547.69	35666.2	0.05	0.0159	9.5367	R4
13	3	34897.4	4.2458	2547.16	96263.4	3.05	0.0729	43.7223	R4	13	4	34895.7	4.2469	2547.83	35865.1	0.58	0.0166	9.9769	R4	14	4	34897.9	4.2461	2547.31	52061.1	0.28	0.0188	11.2974	R4	11	4	34498.2	4.3464	2607.49	58869.3	0.18	0.0457	27.4365	R3	12	4	34495.2	4.3461	2607.32	20725.8	0.03	0.0157	9.39	R3
12	3	34489.6	4.3456	2607	75941.8	2.4	0.0594	35.6527	R3	12	4	34487.2	4.3469	2607.76	20829.5	0.33	0.0159	9.5367	R3	13	4	34484.4	4.3472	2607.99	39218	0.21	0.0103	6.1622	R3	10	4	34245.6	4.4082	2644.55	45041.5	0.14	0.0286	17.1661	R2	11	4	34245	4.4073	2644.04	10824.3	0.02	0.0127	7.6294	R2
11	3	34233.3	4.4083	2644.6	54425.8	1.72	0.0467	28.0234	R2	11	4	34231	4.4095	2645.35	11099.8	0.18	0.0159	9.5367	R2	12	4	34263.5	4.4012	2640.4	20604.5	0.11	0.0179	10.7105	R2	9	3	27799.3	5.9847	3590.35	54780.3	0.17	0.0169	10.1236	UMP6/R1	10	3	27864.3	5.9678	3580.21	32147.1	0.05	0.0083	4.9885	UMP6/Phe
10	2	27849.7	5.9695	3581.19	36641.3	1.16	0.0098	5.8688	UMP6/R1	10	3	27853	5.9693	3581.12	30336.9	0.49	0.0078	4.695	UMP6/R1	11	4	34228.7	4.4098	2645.5	25597.5	0.14	0.0108	6.4556	R2	8	2	22374.2	7.3115	4386.31	3.64573e+06	11.23	0.0103	6.1622	Phe	9	3	27794.7	5.9848	3590.42	53177.3	0.08	0.0181	10.8572	UMP6/Phe
9	2	27789.7	5.9841	3590.01	58730.5	1.86	0.0191	11.4441	UMP6/R1	9	3	27785.3	5.9859	3591.05	51248.1	0.82	0.0198	11.8842	UMP6/R1	10	3	27852.9	5.9691	3580.96	41889.2	0.22	0.0083	4.9885	R1	7	2	22324.9	7.3236	4393.55	4.86805e+06	15	0.0125	7.4827	Phe	8	2	22368.6	7.3119	4386.53	7.38726e+06	11.35	0.0108	6.4556	Phe
8	1	22362.4	7.3115	4386.29	78662.1	2.49	0.011	6.6024	Phe	8	2	22364.7	7.3116	4386.36	698850	11.21	0.01	6.0155	Phe	9	3	27795.5	5.9831	3589.38	57731	0.31	0.0088	5.2819	R1	6	2	22153.7	7.3654	4418.66	1.85699e+06	5.72	0.0117	7.0425	Phe	7	2	22319.8	7.3238	4393.68	9.76254e+06	15	0.0122	7.336	Phe
7	1	22314.1	7.3233	4393.39	99453.5	3.15	0.0125	7.4827	Phe	7	2	22316.4	7.3234	4393.45	935178	15	0.0137	8.2163	Phe	8	2	22365	7.3112	4386.14	2.16644e+06	11.58	0.0098	5.8688	Phe	5	2	22107.2	7.3768	4425.49	1.77084e+06	5.46	0.0117	7.0425	Phe	6	2	22149.1	7.3655	4418.74	3702926	5.69	0.0122	7.336	Phe
6	1	22142.3	7.3653	4418.59	38361.3	1.21	0.0127	7.6294	Phe	6	2	22145.4	7.3652	4418.54	358204	5.75	0.012	7.1892	Phe	7	2	22314.1	7.3236	4393.6	2.80775e+06	15	0.009	5.4286	Phe	4	2	21990.3	7.4054	4442.64	3.21605e+06	9.91	0.0103	6.1622	Phe	5	2	22101.1	7.3773	4425.78	3.48541e+06	5.36	0.0115	6.8958	Phe
5	1	22096.9	7.3764	4425.25	35653.9	1.13	0.0117	7.0425	Phe	5	2	22098.5	7.3767	4425.42	342527	5.49	0.0125	7.4827	Phe	6	2	22144.5	7.3651	4418.49	1.09022e+06	5.82	0.0098	5.8688	Phe	3	2	21941.9	7.4172	4449.74	3.82836e+06	11.8	0.0125	7.4827	Phe	4	2	21985.4	7.4056	4442.76	6.4714e+06	9.94	0.0108	6.4556	Phe
4	1	21979.2	7.4052	4442.51	67186.3	2.13	0.0112	6.7491	Phe	4	2	21981.7	7.4052	4442.55	616814	9.89	0.01	6.0155	Phe	5	2	22095.8	7.377	4425.63	991459	5.3	0.0098	5.8688	Phe	2	1	19182.6	8.092	4854.58	48440.6	0.15	0.0078	4.695	UMP5	3	2	21936.5	7.4175	4449.93	7.61525e+06	11.7	0.0122	7.336	Phe
3	1	21930	7.4172	4449.74	75508.8	2.39	0.0122	7.336	Phe	3	2	21932.4	7.4173	4449.78	737981	11.84	0.0139	8.363	Phe	4	2	21981	7.4051	4442.48	1.93766e+06	10.36	0.0088	5.2819	Phe	1	1	19125.1	8.1061	4863.02	49210.7	0.15	0.0083	4.9885	UMP5	2	1	19184.4	8.0906	4853.71	49211.8	0.08	0.0088	5.2819	UMP5
2	1	19170.2	8.0922	4854.65	46551.7	1.47	0.0093	5.5753	UMP5	2	1	19170.8	8.0927	4854.96	47201.9	0.76	0.0093	5.5753	UMP5	3	2	21930.8	7.4174	4449.84	2.25452e+06	12.04	0.0083	4.9885	Phe											1	1	19126.8	8.1047	4862.17	48207.7	0.07	0.0086	5.1352	UMP5
1	1	19112.9	8.1062	4863.05	44609.6	1.41	0.0093	5.5753	UMP5	1	1	19113.9	8.1066	4863.32	45478.6	0.73	0.0095	5.722	UMP5	2	1	19172.4	8.092	4854.55	63849.9	0.34	0.0059	3.5213	UMP5
																				1	1	19115.3	8.1059	4862.92	63605.8	0.34	0.0056	3.3745	UMP5

[truncated: 40 more columns]

## Sheet: S34 Controls
AMP
Control C	0.1 mM AMP	07.10.2022								Control C	0.1 mM AMP	11.10.2022								Control C	0.1 mM AMP	21.10.2022								Control C	0.1 mM AMP	02.11.2022								Control C	0.1 mM AMP	29.11.2022
Peak	Region	Index (F1)	ν(F1) [ppm]	ν(F1) [Hz]	Intensity [abs]	Intensity [rel]	Half width [ppm]	Half width [Hz]	Annotation	Peak	Region	Index (F1)	ν(F1) [ppm]	ν(F1) [Hz]	Intensity [abs]	Intensity [rel]	Half width [ppm]	Half width [Hz]	Annotation	Peak	Region	Index (F1)	ν(F1) [ppm]	ν(F1) [Hz]	Intensity [abs]	Intensity [rel]	Half width [ppm]	Half width [Hz]	Annotation	Peak	Region	Index (F1)	ν(F1) [ppm]	ν(F1) [Hz]	Intensity [abs]	Intensity [rel]	Half width [ppm]	Half width [Hz]	Annotation	Peak	Region	Index (F1)	ν(F1) [ppm]	ν(F1) [Hz]	Intensity [abs]	Intensity [rel]	Half width [ppm]	Half width [Hz]	Annotation
8	6	52262.7	-0.0001	-0.0726	559709	3.01	0.0061	3.668	DSS	8	5	52257.4	-0.0001	-0.0738	525493	15	0.0068	4.1081	DSS	8	5	52256.5	-0.0001	-0.0732	402464	13.01	0.0066	3.9614	DSS	7	5	52259.3	-0.0001	-0.075	172149	15	0.0247	14.8186	DSS	8	7	52260	-0.0001	-0.0732	366281	14.34	0.0098	5.8688	DSS
7	5	35904.4	4.0005	2400	187980	1.01	0.0166	9.9769	Ribose H5	7	4	35899.4	4.0004	2399.95	182334	5.2	0.0166	9.9769	Ribose H5	7	3	35896.4	4.001	2400.26	141529	4.57	0.0166	9.9769	Ribose C5	6	4	35900.7	4.0006	2400.04	106283	9.26	0.0269	16.1391	Ribose C5	7	6	35902.8	4.0003	2399.85	181907	7.12	0.0176	10.5638	R5
6	4	34465.3	4.3525	2611.16	36666.7	0.2	0.0179	10.7105	Ribose H4	6	3	34460.7	4.3523	2611.04	30105.8	0.86	0.0149	8.9499	Ribose H4	6	2	34457.7	4.3528	2611.35	21185.8	0.68	0.0152	9.0966	Ribose C4	5	3	34460.1	4.3529	2611.4	16067.7	1.4	0.0254	15.2588	Ribose C4	6	5	34460.1	4.3531	2611.51	40175.2	1.57	0.0225	13.4982	R4
5	3	33860.5	4.5004	2699.88	10501.5	0.06	0.0095	5.722	Ribose H2	5	3	33859.7	4.4993	2699.21	7028.31	0.2	0.0157	9.39	Ribose H2	5	2	33854.2	4.5004	2699.89	3583.98	0.12	0.013	7.7761	Ribose C3	4	3	33858.7	4.5	2699.64	2862.91	0.25	0.0093	5.5753	Ribose C2	5	4	33866.6	4.4982	2698.59	10250.5	0.4	0.021	12.6178	R2
4	2	27237.1	6.1202	3671.66	55764.1	0.3	0.0086	5.1352	Ribose H1	4	2	27231.4	6.1203	3671.71	53439.8	1.53	0.009	5.4286	Ribose H1	4	1	27230.5	6.1203	3671.71	39680.6	1.28	0.0088	5.2819	Ribose C1	3	2	27211.2	6.1258	3674.97	29951.1	2.61	0.0274	16.4325	Ribose C1	4	2	27234.2	6.1203	3671.69	42880.5	1.68	0.0066	3.9614	R1
3	2	27197.5	6.1299	3677.47	53953.2	0.29	0.0081	4.8417	Ribose H1	3	2	27191.8	6.13	3677.53	49662.4	1.42	0.0083	4.9885	Ribose H1	3	1	27191.2	6.13	3677.48	38372.3	1.24	0.0083	4.9885	Ribose C1	2	1	18497.1	8.2569	4953.49	25937.3	2.26	0.0247	14.8186	AMP 2	3	2	27200.1	6.1287	3676.7	41802.8	1.64	0.0093	5.5753	R1
2	1	18506.2	8.2555	4952.65	87058.3	0.47	0.0061	3.668	AMP H2	2	1	18500.7	8.2556	4952.67	81374.6	2.32	0.0068	4.1081	AMP H2	2	1	18499.6	8.2556	4952.7	61959.5	2	0.0066	3.9614	AMP H2	1	1	17102.4	8.598	5158.12	35751.5	3.12	0.0249	14.9654	AMP 8	2	1	18504.3	8.2553	4952.54	60383.1	2.36	0.0095	5.722	AMP2
1	1	17113.8	8.596	5156.94	119274	0.64	0.0061	3.668	AMP H8	1	1	17108.8	8.596	5156.9	111839	3.19	0.0071	4.2549	AMP H8	1	1	17108.9	8.5957	5156.75	85126.4	2.75	0.0068	4.1081	AMP H8											1	1	17113	8.5956	5156.67	87411	3.42	0.0093	5.5753	AMP8
CMP
Control D	0.1 mM CMP	07.10.2022								Control D	0.1 mM CMP	11.10.2022								Control D	0.1 mM CMP	21.10.2022								Control D	0.1 mM CMP	02.11.2022								Control D	0.1 mM CMP	29.11.2022
Peak	Region	Index (F1)	ν(F1) [ppm]	ν(F1) [Hz]	Intensity [abs]	Intensity [rel]	Half width [ppm]	Half width [Hz]	Annotation	Peak	Region	Index (F1)	ν(F1) [ppm]	ν(F1) [Hz]	Intensity [abs]	Intensity [rel]	Half width [ppm]	Half width [Hz]	Annotation	Peak	Region	Index (F1)	ν(F1) [ppm]	ν(F1) [Hz]	Intensity [abs]	Intensity [rel]	Half width [ppm]	Half width [Hz]	Annotation	Peak	Region	Index (F1)	ν(F1) [ppm]	ν(F1) [Hz]	Intensity [abs]	Intensity [rel]	Half width [ppm]	Half width [Hz]	Annotation	Peak	Region	Index (F1)	ν(F1) [ppm]	ν(F1) [Hz]	Intensity [abs]	Intensity [rel]	Half width [ppm]	Half width [Hz]	Annotation
12	4	52253.2	-0.0001	-0.0726	580710	15	0.0059	3.5213	DSS	12	4	52256.6	-0.0001	-0.0744	448158	14.13	0.0083	4.9885	DSS	12	4	52254.7	-0.0001	-0.0714	401355	14.84	0.0066	3.9614	DSS	8	3	52260.4	-0.0001	-0.0714	177416	15	0.0249	14.9654	DSS	12	3	52259.9	-0.0001	-0.072	378215	11.17	0.009	5.4286	DSS
11	3	36064	3.9592	2375.19	31259.4	0.81	0.0132	7.9228	Ribose C5	11	3	36063.3	3.9602	2375.8	28741.8	0.91	0.0154	9.2433	Ribose C5	11	3	36058.8	3.9608	2376.18	22237.5	0.82	0.0137	8.2163	Ribose C5	7	2	35995.9	3.9776	2386.24	39816.6	3.37	0.0377	22.5947	Ribose C5	11	2	36062.4	3.9612	2376.41	28115.2	0.83	0.0051	3.0811	R5
10	3	35983.6	3.9788	2386.99	56203.4	1.45	0.0196	11.7375	Ribose C5	10	3	35984.1	3.9796	2387.43	51260.3	1.62	0.0225	13.4982	Ribose C5	10	3	35981.6	3.9797	2387.51	36942.2	1.37	0.0203	12.1777	Ribose C5	6	2	35734.5	4.0415	2424.59	38311	3.24	0.0367	22.0079	Ribose C5	10	2	35982.1	3.9809	2388.2	47185.6	1.39	0.0098	5.8688	R5
9	3	35750.7	4.0358	2421.15	66458.5	1.72	0.0142	8.5097	Ribose C5	9	3	35752.8	4.0361	2421.36	59895.8	1.89	0.0154	9.2433	Ribose C5	9	3	35750.6	4.0362	2421.39	44374.6	1.64	0.0144	8.6564	Ribose C5	5	2	34960.9	4.2307	2538.09	29907.8	2.53	0.0274	16.4325	Ribose C4	9	2	35757.8	4.0357	2421.1	56114.8	1.66	0.0149	8.9499	R5
8	3	35669.7	4.0556	2433.05	34887.3	0.9	0.0154	9.2433	Ribose C5	8	3	35674.8	4.0552	2432.8	31828.5	1	0.0152	9.0966	Ribose C5	8	3	35670.4	4.0558	2433.16	21406.9	0.79	0.0152	9.0966	Ribose C5	4	2	34542	4.3332	2599.55	40483.4	3.42	0.0257	15.4055	Ribose C3/2	8	2	35677.5	4.0553	2432.88	27538.1	0.81	0.0144	8.6564	R5
7	3	34956	4.2302	2537.76	50928.6	1.32	0.0157	9.39	Ribose C4	7	3	34955.7	4.2311	2538.3	48294.4	1.52	0.0161	9.6835	Ribose C4	7	3	34954.7	4.2308	2538.17	32402.9	1.2	0.0161	9.6835	Ribose C4	3	1	27750.9	5.994	3595.94	27059	2.29	0.0276	16.5793	Ribose C1	7	2	34963.3	4.23	2537.67	42743.3	1.26	0.0161	9.6835	R4
6	3	34542.3	4.3313	2598.46	80777.9	2.09	0.0122	7.336	Ribose C2/C3	6	3	34535.2	4.3339	2599.99	76302.5	2.41	0.0132	7.9228	Ribose C2/C3	6	3	34542	4.3318	2598.71	49811.2	1.84	0.0127	7.6294	Ribose C2/C3	2	1	27199.2	6.129	3676.88	28692	2.43	0.033	19.8071	CMP 5	6	2	34541	4.3333	2599.64	67762.4	2	0.0135	8.0696	R2/3
5	2	27756.7	5.9908	3594.02	52764.3	1.36	0.0117	7.0425	Ribose C1	5	2	27750.3	5.9932	3595.47	49850.1	1.57	0.0127	7.6294	Ribose C1	5	2	27754.8	5.9917	3594.53	34415.9	1.27	0.0125	7.4827	Ribose C1	1	1	19154.8	8.0963	4857.15	37166.2	3.14	0.0311	18.6333	CMP 6	5	1	27755.2	5.9929	3595.25	45842.8	1.35	0.0135	8.0696	R1
4	2	27219.5	6.1222	3672.85	60073.4	1.55	0.0064	3.8147	CMP H5	4	2	27222.5	6.1223	3672.91	45836.3	1.45	0.0088	5.2819	CMP H5	4	2	27221.2	6.1222	3672.81	37483.9	1.39	0.0073	4.4016	CMP H5											4	1	27226.8	6.1221	3672.77	40571.5	1.2	0.0098	5.8688	CMP5
3	2	27164.3	6.1357	3680.94	54068.8	1.4	0.0059	3.5213	CMP H5	3	2	27165.7	6.1362	3681.24	41091	1.3	0.0088	5.2819	CMP H5	3	2	27166.3	6.1356	3680.88	32375.7	1.2	0.0066	3.9614	CMP H5											3	1	27171.5	6.1356	3680.88	34053.4	1	0.0098	5.8688	CMP5
2	1	19185	8.0872	4851.66	72972.8	1.89	0.0061	3.668	CMP H6	2	1	19188.6	8.0872	4851.64	56208.7	1.77	0.0083	4.9885	CMP H6	2	1	19188.2	8.0868	4851.42	46351.6	1.71	0.0068	4.1081	CMP H6											2	1	19192.3	8.087	4851.58	50960.9	1.5	0.0093	5.5753	CMP6
1	1	19131.2	8.1003	4859.56	73128	1.89	0.0059	3.5213	CMP H6	1	1	19133.3	8.1007	4859.75	56453.3	1.78	0.0083	4.9885	CMP H6	1	1	19134.5	8.0999	4859.3	46855.3	1.73	0.0066	3.9614	CMP H6											1	1	19138.9	8.1001	4859.42	51096.4	1.51	0.0086	5.1352	CMP6
GMP
Control E	0.1 mM GMP	07.10.2022								Control E	0.1 mM GMP	11.10.2022								Control E	0.1 mM GMP	13.10.2022								Control E	0.1 mM GMP	21.10.2022								Control E	0.1 mM GMP	02.12.2022		Control E	0.1 mM GMP	16.12.2022
Peak	Region	Index (F1)	ν(F1) [ppm]	ν(F1) [Hz]	Intensity [abs]	Intensity [rel]	Half width [ppm]	Half width [Hz]	Annotation	Peak	Region	Index (F1)	ν(F1) [ppm]	ν(F1) [Hz]	Intensity [abs]	Intensity [rel]	Half width [ppm]	Half width [Hz]	Annotation	Peak	Region	Index (F1)	ν(F1) [ppm]	ν(F1) [Hz]	Intensity [abs]	Intensity [rel]	Half width [ppm]	Half width [Hz]	Annotation	Peak	Region	Index (F1)	ν(F1) [ppm]	ν(F1) [Hz]	Intensity [abs]	Intensity [rel]	Half width [ppm]	Half width [Hz]	Annotation	* for GMP samples recorded on 02.12.2022, average of previous GMP controls was used				Peak	Region	Index (F1)	ν(F1) [ppm]	ν(F1) [Hz]	Intensity [abs]
7	5	52256.2	-0.0001	-0.0744	556319	14.9	0.0059	3.5213	DSS	7	5	52259.6	-0.0001	-0.0732	420195	14.02	0.0088	5.2819	DSS	7	8	52255.6	-0.0001	-0.0732	590243	15	0.0056	3.3745	DSS	7	4	52258.4	-0.0001	-0.0714	338961	15	0.0083	4.9885	DSS					6	5	52274.3	-0.0001	-0.0732	310203
6	4	35976.7	3.9813	2388.44	113214	3.03	0.0174	10.4171	Ribose C5	6	4	35979.2	3.9815	2388.56	97402.8	3.25	0.0181	10.8572	Ribose C5	6	6	35975	3.9815	2388.61	108188	2.75	0.0142	8.5097	Ribose C5	6	3	35977	3.9817	2388.72	69875.5	3.09	0.0179	10.7105	Ribose C5					5	3	35992.1	3.9819	2388.83	107809
5	3	34658.3	4.3037	2581.88	24020	0.64	0.0161	9.6835	Ribose C4	5	3	34652.5	4.3059	2583.22	21629.3	0.72	0.0179	10.7105	Ribose C4	5	5	34658.5	4.3035	2581.77	22154.1	0.56	0.0157	9.39	Ribose C4	5	3	34650.2	4.3062	2583.39	13269.9	0.59	0.0174	10.4171	Ribose C4					4	3	34677.9	4.3033	2581.66	21850.9
4	3	33953.5	4.4761	2685.29	5427.26	0.15	0.0037	2.2008	Ribose C3	4	3	33948.9	4.478	2686.46	5515.43	0.18	0.0108	6.4556	Ribose C3	4	4	33955.2	4.4755	2684.96	6108.65	0.16	0.0164	9.8302	Ribose C3	4	3	33946.3	4.4784	2686.66	1752.73	0.08	0.0088	5.2819	Ribose C3					3	3	33972.6	4.4758	2685.14	3651.18
3	2	28086.4	5.911	3546.1	34360.6	0.92	0.0073	4.4016	Ribose C1	3	2	28087.8	5.9114	3546.39	26910.7	0.9	0.0095	5.722	Ribose C1	3	2	28086.2	5.9109	3546.04	34517.7	0.88	0.0064	3.8147	Ribose C1	3	2	28087.6	5.9112	3546.25	19637.5	0.87	0.0098	5.8688	Ribose C1					2	2	28102	5.9116	3546.47	28533.2
2	2	28045.1	5.9211	3552.16	31883.7	0.85	0.0073	4.4016	Ribose C1	2	2	28049.2	5.9209	3552.05	24778.9	0.83	0.0098	5.8688	Ribose C1	2	2	28044.3	5.9211	3552.19	31838.7	0.81	0.0064	3.8147	Ribose C1	2	2	28047.3	5.9211	3552.16	18563.1	0.82	0.009	5.4286	Ribose C1					1	1	18808	8.1845	4910.07	62149
1	1	18787.1	8.1852	4910.49	88296.7	2.37	0.0064	3.8147	GMP H8	1	1	18789.9	8.1854	4910.57	66254.7	2.21	0.0088	5.2819	GMP H8	1	1	18787.6	8.185	4910.33	87123.8	2.21	0.0056	3.3745	GMP H8	1	1	18790.5	8.1849	4910.31	48071.3	2.13	0.0081	4.8417	GMP H8
UMP
Control F	0.1 mM UMP	07.10.2022								Control F	0.1 mM UMP	11.10.2022								Control F	0.1 mM UMP	13.10.2022								Control F	0.1 mM UMP	21.10.2022								Control F	0.1 mM UMP	26.10.2022
Peak	Region	Index (F1)	ν(F1) [ppm]	ν(F1) [Hz]	Intensity [abs]	Intensity [rel]	Half width [ppm]	Half width [Hz]	Annotation	Peak	Region	Index (F1)	ν(F1) [ppm]	ν(F1) [Hz]	Intensity [abs]	Intensity [rel]	Half width [ppm]	Half width [Hz]	Annotation	Peak	Region	Index (F1)	ν(F1) [ppm]	ν(F1) [Hz]	Intensity [abs]	Intensity [rel]	Half width [ppm]	Half width [Hz]	Annotation	Peak	Region	Index (F1)	ν(F1) [ppm]	ν(F1) [Hz]	Intensity [abs]	Intensity [rel]	Half width [ppm]	Half width [Hz]	Annotation	Peak	Region	Index (F1)	ν(F1) [ppm]	ν(F1) [Hz]	Intensity [abs]	Intensity [rel]	Half width [ppm]	Half width [Hz]	Annotation
11	4	52256.3	-0.0001	-0.0756	463736	13.45	0.0078	4.695	DSS	11	5	52258	-0.0001	-0.0744	450086	13.41	0.0083	4.9885	DSS	11	4	52257	-0.0001	-0.075	396407	12.92	0.0098	5.8688	DSS	11	4	52255.7	-0.0001	-0.0744	358238	15	0.0076	4.5483	DSS	11	5	52255	-0.0001	-0.0726	483282	15	0.0071	4.2549	DSS
10	3	36020.1	3.9707	2382.08	48653.9	1.41	0.0213	12.7646	Ribose C5	10	4	36019	3.9714	2382.5	46683.2	1.39	0.0208	12.4711	Ribose C5	10	3	36024.1	3.9699	2381.6	44913	1.46	0.0237	14.2318	Ribose C5	10	3	36013.3	3.9722	2382.99	33746.3	1.41	0.0213	12.7646	Ribose C5	10	4	36014.1	3.9718	2382.78	41826.1	1.3	0.0193	11.5908	Ribose C5
9	3	35875.2	4.0061	2403.34	58385.2	1.69	0.0147	8.8031	Ribose C5	9	4	35877.1	4.0061	2403.33	55747.3	1.66	0.0152	9.0966	Ribose C5	9	3	35875.3	4.0063	2403.43	51922.8	1.69	0.0159	9.5367	Ribose C5	9	3	35874.9	4.006	2403.3	39678.5	1.66	0.0147	8.8031	Ribose C5	9	4	35873.4	4.0062	2403.42	49402.8	1.53	0.0149	8.9499	Ribose C5
8	3	35797.6	4.0251	2414.72	25097.3	0.73	0.0147	8.8031	Ribose C5	8	4	35797.1	4.0256	2415.06	25310.3	0.75	0.0142	8.5097	Ribose C5	8	3	35797.8	4.0252	2414.81	23400.5	0.76	0.0137	8.2163	Ribose C5	8	3	35796.4	4.0252	2414.82	16785.1	0.7	0.0144	8.6564	Ribose C5	8	4	35794.7	4.0255	2414.96	22326.9	0.69	0.0147	8.8031	Ribose C5
7	3	34895.1	4.2458	2547.14	40723.3	1.18	0.0161	9.6835	Ribose C4	7	3	34895.2	4.2462	2547.39	39503.8	1.18	0.0164	9.8302	Ribose C4	7	3	34893.1	4.2465	2547.54	36591.2	1.19	0.0171	10.2703	Ribose C4	7	3	34894.3	4.2459	2547.17	26272	1.1	0.0159	9.5367	Ribose C4	7	3	34891.4	4.2464	2547.49	34303	1.06	0.0159	9.5367	Ribose C4
6	3	34479.6	4.3474	2608.1	24526.3	0.71	0.0186	11.1507	Ribose C3	6	3	34481.8	4.3473	2608.04	25068.2	0.75	0.0183	11.0039	Ribose C3	6	3	34484.3	4.3465	2607.53	23579.4	0.77	0.0127	7.6294	Ribose C3	6	3	34478.1	4.3476	2608.23	16184.6	0.68	0.0179	10.7105	Ribose C3	6	3	34478.5	4.3474	2608.08	23155.2	0.72	0.0147	8.8031	Ribose C3
5	3	34223.2	4.4101	2645.72	14438.7	0.42	0.0125	7.4827	Ribose C2	5	3	34226.3	4.4098	2645.53	14421.9	0.43	0.0201	12.031	Ribose C2	5	3	34226.1	4.4096	2645.41	13045	0.42	0.0157	9.39	Ribose C2	5	3	34223.9	4.4098	2645.53	7712	0.32	0.01	6.0155	Ribose C2	5	3	34222.1	4.4101	2645.7	12492.5	0.39	0.0122	7.336	Ribose C2
4	2	27847.5	5.9694	3581.16	35396	1.03	0.009	5.4286	UMP 6, Ribose C1	4	2	27849.2	5.9694	3581.17	33464.6	1	0.009	5.4286	UMP H6, Ribose C1	4	2	27848.7	5.9693	3581.1	30326.4	0.99	0.0078	4.695	UMP H6, Ribose C1	4	2	27846.8	5.9694	3581.17	26242.7	1.1	0.0093	5.5753	UMP 6, Ribose C1	4	2	27846.3	5.9694	3581.15	32101.6	1	0.0086	5.1352	UMP 6, Ribose C1
3	2	27789.6	5.9835	3589.65	56305.2	1.63	0.0149	8.9499	UMP H6, Ribose C1	3	2	27790.1	5.9839	3589.84	54450.8	1.62	0.0152	9.0966	UMP H6, Ribose C1	3	2	27786.9	5.9844	3590.16	53131.1	1.73	0.0191	11.4441	UMP H6, Ribose C1	3	2	27790.9	5.9831	3589.37	38330.6	1.61	0.0095	5.722	UMP 6, Ribose C1	3	2	27789.3	5.9833	3589.51	48220.1	1.5	0.0088	5.2819	UMP 6, Ribose C1
2	1	19168.1	8.0921	4854.59	54682.1	1.59	0.0078	4.695	UMP H5	2	1	19169.5	8.0922	4854.64	51216.6	1.52	0.0081	4.8417	UMP H5	2	1	19168.7	8.0921	4854.62	44122.8	1.44	0.0098	5.8688	UMP H5	2	1	19167.4	8.0921	4854.61	38630.3	1.62	0.0076	4.5483	UMP H5	2	1	19167.3	8.092	4854.53	49253.9	1.53	0.0068	4.1081	UMP H5
1	1	19110.4	8.1062	4863.06	52234.3	1.52	0.0078	4.695	UMP H5	1	1	19111.5	8.1063	4863.15	50036.8	1.49	0.0078	4.695	UMP H5	1	1	19111.2	8.1062	4863.05	43291.2	1.41	0.0095	5.722	UMP H5	1	1	19110.4	8.106	4862.97	37306.9	1.56	0.0073	4.4016	UMP H5	1	1	19109.8	8.106	4862.96	47679.7	1.48	0.0071	4.2549	UMP H5
Arginine
Control B	0.1 mM Arg	07.10.2022								Control B	1 mM Arg	23.01.2023
Peak	Region	Index (F1)	ν(F1) [ppm]	ν(F1) [Hz]	Intensity [abs]	Intensity [rel]	Half width [ppm]	Half width [Hz]	Annotation	Peak	Region	Index (F1)	ν(F1) [ppm]	ν(F1) [Hz]	Intensity [abs]	Intensity [rel]	Half width [ppm]	Half width [Hz]	Annotation
22	3	52256	-0.0001	-0.075	529692	12.1	0.0064	3.8147	DSS	20	4	52265	-0.0001	-0.0726	399700	4.57	0.0081	4.8417	DSS
21	2	45539.8	1.6424	985.326	27157.7	0.62	0.0115	6.8958	Arg C4	19	3	45547.2	1.6428	985.563	147464	1.68	0.0115	6.8958	Arg
20	2	45507.5	1.6503	990.058	29329.3	0.67	0.0105	6.3089	Arg C4	18	3	45519.5	1.6496	989.632	154896	1.77	0.0115	6.8958	Arg
19	2	45459.6	1.662	997.085	25400.4	0.58	0.0117	7.0425	Arg C4	17	3	45471.5	1.6613	996.664	131735	1.5	0.0122	7.336	Arg
18	2	45409.7	1.6743	1004.42	17036.6	0.39	0.0103	6.1622	Arg C4	16	3	45420.6	1.6738	1004.14	90634.8	1.04	0.0105	6.3089	Arg
17	2	45357.8	1.6869	1012.03	22903.1	0.52	0.013	7.7761	Arg C4	15	3	45367.9	1.6867	1011.87	114748	1.31	0.0125	7.4827	Arg
16	2	45293.3	1.7027	1021.49	32199.5	0.73	0.0149	8.9499	Arg C4	14	3	45305.5	1.7019	1021.03	167765	1.92	0.0164	9.8302	Arg
15	2	45245.4	1.7144	1028.51	34910.5	0.8	0.0117	7.0425	Arg C4	13	3	45257.4	1.7137	1028.09	173479	1.98	0.012	7.1892	Arg
14	2	45201.6	1.7251	1034.95	36830	0.84	0.0115	6.8958	Arg C4	12	3	45213.3	1.7245	1034.55	144212	1.65	0.0112	6.7491	Arg
13	2	45149.5	1.7379	1042.58	35574.5	0.81	0.0137	8.2163	Arg C4	11	3	45165.5	1.7362	1041.57	105606	1.21	0.0135	8.0696	Arg
12	2	45084.2	1.7538	1052.17	36846.9	0.84	0.011	6.6024	Arg C4	10	3	45100.2	1.7522	1051.15	60198.6	0.69	0.0137	8.2163	Arg
11	2	45026.3	1.768	1060.66	22883.2	0.52	0.0117	7.0425	Arg C4	9	3	44597.3	1.8751	1124.94	256243	2.93	0.01	6.0155	Arg
10	2	44965.9	1.7828	1069.53	13674.1	0.31	0.0112	6.7491	Arg C4	8	3	44551.9	1.8862	1131.59	422624	4.83	0.0166	9.9769	Arg
9	2	44587.8	1.8752	1125	49325.8	1.13	0.01	6.0155	Arg C3	7	3	44504.9	1.8977	1138.48	368172	4.21	0.0147	8.8031	Arg
8	2	44540.2	1.8869	1131.98	81698.4	1.86	0.0139	8.363	Arg C3	6	2	39095.7	3.2206	1932.12	396280	4.53	0.0098	5.8688	Arg
7	2	44491.2	1.8989	1139.18	70123.1	1.6	0.0159	9.5367	Arg C3	5	2	39047.5	3.2324	1939.2	737227	8.42	0.009	5.4286	Arg
6	1	39086.4	3.2207	1932.17	83797.1	1.91	0.009	5.4286	Arg C5 triplet	4	2	38999.4	3.2442	1946.25	401871	4.59	0.0095	5.722	Arg
5	1	39038	3.2325	1939.26	157712	3.6	0.0071	4.2549	Arg C5 triplet	3	1	36980.1	3.738	2242.52	162101	1.85	0.009	5.4286	Arg
4	1	38989.5	3.2444	1946.38	82760.9	1.89	0.0086	5.1352	Arg C5 triplet	2	1	36937.2	3.7485	2248.81	292771	3.35	0.009	5.4286	Arg
3	1	36964.4	3.7397	2243.49	35798.5	0.82	0.0086	5.1352	Arg alpha C triplet	1	1	36894.8	3.7589	2255.04	167945	1.92	0.0088	5.2819	Arg
2	1	36921.3	3.7502	2249.82	66041.3	1.51	0.0068	4.1081	Arg alpha C triplet
1	1	36878.3	3.7607	2256.13	36340.4	0.83	0.0083	4.9885	Arg alpha C triplet
Aspartate
Control H	0.1 mM Asp	09.12.2022
Peak	Region	Index (F1)	ν(F1) [ppm]	ν(F1) [Hz]	Intensity [abs]	Intensity [rel]	Half width [ppm]	Half width [Hz]	Annotation
13	3	52255.8	-0.0001	-0.0744	421691	14.16	0.0068	4.1081	DSS
12	2	41499.1	2.6306	1578.15	13457	0.45	0.0068	4.1081	Asp beta-C
11	2	41433.7	2.6466	1587.74	18567.5	0.62	0.0086	5.1352	Asp beta-C
10	2	41379.2	2.6599	1595.73	34518.6	1.16	0.0076	4.5483	Asp beta-C
9	2	41314.8	2.6757	1605.18	36586.1	1.23	0.0078	4.695	Asp beta-C
8	2	40860.7	2.7867	1671.8	46824.4	1.57	0.0076	4.5483	Asp beta-C
7	2	40837.6	2.7924	1675.2	42890.1	1.44	0.0061	3.668	Asp beta-C
6	2	40739.4	2.8164	1689.61	22286.6	0.75	0.0066	3.9614	Asp beta-C
5	2	40717.9	2.8216	1692.75	23134.9	0.78	0.0061	3.668	Asp beta-C
4	1	36394.6	3.879	2327.06	30870.3	1.04	0.0068	4.1081	Asp alpha-C
3	1	36371.4	3.8846	2330.47	29610	0.99	0.0078	4.695	Asp alpha-C
2	1	36332.4	3.8942	2336.19	26061.6	0.87	0.0076	4.5483	Asp alpha-C
1	1	36308.1	3.9001	2339.76	26009.9	0.87	0.0073	4.4016	Asp alpha-C
Glycine
Control G	0.1 mM Gly	13.10.2022
Peak	Region	Index (F1)	ν(F1) [ppm]	ν(F1) [Hz]	Intensity [abs]	Intensity [rel]	Half width [ppm]	Half width [Hz]	Annotation
2	2	52260.8	-0.0001	-0.0726	326196	13.83	0.0076	4.5483	DSS
1	1	37757.3	3.5469	2127.87	100961	4.28	0.0076	4.5483	Gly
Phenylalanine
Control A	0.1 mM Phe	07.10.2022								Control A	0.1 mM Phe	11.10.2022								Control A	0.1 mM Phe	02.12.2022
Peak	Region	Index (F1)	ν(F1) [ppm]	ν(F1) [Hz]	Intensity [abs]	Intensity [rel]	Half width [ppm]	Half width [Hz]	Annotation	Peak	Region	Index (F1)	ν(F1) [ppm]	ν(F1) [Hz]	Intensity [abs]	Intensity [rel]	Half width [ppm]	Half width [Hz]	Annotation	Peak	Region	Index (F1)	ν(F1) [ppm]	ν(F1) [Hz]	Intensity [abs]	Intensity [rel]	Half width [ppm]	Half width [Hz]	Annotation
24	3	52260.1	-0.0001	-0.0726	622478	15	0.0054	3.2278	DSS	23	4	52254.8	-0.0001	-0.0726	632718	15	0.0051	3.0811	DSS	18	4	52258.7	-0.0001	-0.0714	453269	10.5	0.0073	4.4016	DSS
23	2	40433.2	2.8923	1735.17	56218.9	1.35	0.0059	3.5213	Phe beta H2 and Ring	22	2	40427.6	2.8924	1735.2	56875.9	1.35	0.0056	3.3745	Phe beta H2 and Ring	17	3	39631.3	3.0881	1852.61	30266.2	0.7	0.0081	4.8417	Phe
22	2	40377.3	2.906	1743.37	58806.6	1.42	0.0088	5.2819	Phe beta H2 and Ring	21	2	40371.8	2.906	1743.39	59440.1	1.41	0.0088	5.2819	Phe beta H2 and Ring	16	3	39571.5	3.1027	1861.37	33278.6	0.77	0.0083	4.9885	Phe
21	2	40321.2	2.9197	1751.59	45121.8	1.09	0.0059	3.5213	Phe beta H2 and Ring	20	2	40315.8	2.9197	1751.6	45882.6	1.09	0.0054	3.2278	Phe beta H2 and Ring	15	3	39531.1	3.1126	1867.3	49027.5	1.14	0.0095	5.722	Phe
20	2	39632.3	3.0882	1852.68	32035.5	0.77	0.0064	3.8147	Phe beta H2 and Ring	19	2	39626.3	3.0884	1852.76	33069.7	0.78	0.0056	3.3745	Phe beta H2 and Ring	14	3	39471.4	3.1272	1876.06	48055.5	1.11	0.0083	4.9885	Phe
19	2	39574.3	3.1024	1861.19	36926.3	0.89	0.0076	4.5483	Phe beta H2 and Ring	18	2	39568.6	3.1025	1861.24	37377.1	0.89	0.0076	4.5483	Phe beta H2 and Ring	13	3	38940.8	3.2569	1953.91	49756.9	1.15	0.0098	5.8688	Phe
18	2	39531.6	3.1128	1867.45	54448.8	1.31	0.0066	3.9614	Phe beta H2 and Ring	17	2	39525.8	3.1129	1867.51	55951.4	1.33	0.0064	3.8147	Phe beta H2 and Ring	12	3	38905.2	3.2657	1959.14	45094.1	1.05	0.0083	4.9885	Phe
17	2	39474	3.1269	1875.9	56732.7	1.37	0.0064	3.8147	Phe beta H2 and Ring	16	2	39468.3	3.127	1875.95	56641.8	1.34	0.0061	3.668	Phe beta H2 and Ring	11	3	38841.2	3.2813	1968.53	24321	0.56	0.0088	5.2819	Phe
16	2	38941.9	3.257	1953.96	55455.1	1.34	0.0086	5.1352	Phe beta H2 and Ring	15	2	38935.8	3.2572	1954.07	55728.9	1.32	0.0076	4.5483	Phe beta H2 and Ring	10	3	38805	3.2902	1973.83	25246.2	0.59	0.0086	5.1352	Phe
15	2	38905.1	3.266	1959.37	50391.1	1.21	0.0076	4.5483	Phe beta H2 and Ring	14	2	38899.1	3.2662	1959.46	50769.7	1.2	0.0071	4.2549	Phe beta H2 and Ring	9	2	36036.4	3.9673	2380.04	41587.2	0.96	0.0088	5.2819	Phe
14	2	38841.7	3.2816	1968.68	27827.6	0.67	0.0081	4.8417	Phe beta H2 and Ring	13	2	38835.6	3.2817	1968.79	27766.7	0.66	0.0076	4.5483	Phe beta H2 and Ring	8	2	35986.6	3.9795	2387.35	49324.6	1.14	0.0132	7.9228	Phe
13	2	38804.7	3.2906	1974.1	28769.5	0.69	0.0078	4.695	Phe beta H2 and Ring	12	2	38799.3	3.2906	1974.11	27693	0.66	0.0076	4.5483	Phe beta H2 and Ring	7	2	35942.9	3.9901	2393.76	37518.9	0.87	0.0083	4.9885	Phe
12	2	36036.2	3.9677	2380.29	45655.1	1.1	0.0066	3.9614	Phe beta C	11	2	36030	3.9679	2380.42	47913.7	1.14	0.0061	3.668	Phe beta C	6	1	22361.6	7.3116	4386.4	93374.1	2.16	0.0105	6.3089	Phe
11	2	35997.8	3.9771	2385.92	49035.8	1.18	0.0054	3.2278	Phe beta C	10	2	35992.3	3.9771	2385.95	48748.9	1.16	0.0054	3.2278	Phe beta C	5	1	22311.6	7.3239	4393.74	121208	2.81	0.0112	6.7491	Phe
10	2	35980.9	3.9812	2388.4	47053.3	1.13	0.0051	3.0811	Phe beta C	9	2	35974.8	3.9814	2388.51	47214.5	1.12	0.0049	2.9344	Phe beta C	4	1	22142.7	7.3652	4418.52	46529.4	1.08	0.0112	6.7491	Phe
9	2	35942.8	3.9905	2394	41472.4	1	0.0064	3.8147	Phe beta C	8	2	35936.9	3.9907	2394.08	41663.3	0.99	0.0059	3.5213	Phe beta C	3	1	22093.6	7.3772	4425.72	44035.7	1.02	0.0108	6.4556	Phe
8	1	22365.8	7.311	4386	99248.7	2.39	0.0098	5.8688	Phe Ring	7	1	22360.3	7.311	4386.02	100550	2.38	0.0088	5.2819	Phe Ring	2	1	21979.1	7.4052	4442.52	85478	1.98	0.0105	6.3089	Phe
7	1	22314.9	7.3234	4393.47	128452	3.09	0.0083	4.9885	Phe Ring	6	1	22309.3	7.3235	4393.5	127406	3.02	0.0081	4.8417	Phe Ring	1	1	21929.1	7.4174	4449.85	96816.6	2.24	0.0103	6.1622	Phe
6	1	22193.2	7.3532	4411.32	19388.3	0.47	0.0086	5.1352	Phe Ring	5	1	22139.2	7.3651	4418.46	51630	1.22	0.0081	4.8417	Phe Ring
5	1	22144.6	7.3651	4418.46	51221.2	1.23	0.0086	5.1352	Phe Ring	4	1	22090.9	7.3769	4425.55	46126.3	1.09	0.0088	5.2819	Phe Ring
4	1	22096.4	7.3769	4425.53	46198.7	1.11	0.0088	5.2819	Phe Ring	3	1	21976	7.405	4442.4	91475.3	2.17	0.0076	4.5483	Phe Ring
3	1	21981.4	7.405	4442.4	90631	2.18	0.0078	4.695	Phe Ring	2	1	21925.7	7.4173	4449.79	105034	2.49	0.0073	4.4016	Phe Ring
2	1	21931.3	7.4172	4449.75	105084	2.53	0.0073	4.4016	Phe Ring	1	1	21876.3	7.4294	4457.04	33479.1	0.79	0.0081	4.8417	Phe Ring
1	1	21881.5	7.4294	4457.06	34384	0.83	0.0083	4.9885	Phe Ring
[truncated: 40 more columns]
