# Supplementary material for: Biophysical Interactions Underpin the Emergence of Information in the Genetic Code
Source: Preprints.org preprint supplement (doi:10.20944/preprints202304.0160.v1), 2023-04-10
Supplement: Supplementary file 2 [file Halpern et al Life SI Tables 1 to 29.xlsx]

## Sheet: Size information
Table S1	-	AMP	+	-	CMP	+	-	GMP	+	-	UMP	+
Nucleotide Volume Fraction	0.0011	0.0192	0.0013	0.0008	0.0182	0.001	0.0013	0.0196	0.0014	0.0008	0.0178	0.0012
Ring Nitrogen Volume Fraction	0.0005	0.0088	0.0006	0.0005	0.007	0.0005	0.0006	0.0088	0.0006	0.0005	0.0056	0.0004
Table S2	+	Volume fraction	-
Gly	0.0005	0.0091	0.0004
Ala	0.0004	0.0101	0.0005
Arg	0.0007	0.0155	0.0011
Asn	0.0006	0.0115	0.0006
Asp	0.0005	0.0115	0.0006
Cys	0.0005	0.0108	0.0006
Gln	0.0006	0.0129	0.0006
Glu	0.0006	0.0122	0.0006
His	0.0006	0.0132	0.0006
Ile	0.0006	0.0129	0.0006
Leu	0.0007	0.0131	0.0006
Lys	0.0008	0.0141	0.0009
Met	0.0007	0.0131	0.0007
Phe	0.0006	0.0143	0.0006
Pro	0.0006	0.0114	0.0006
Ser	0.0005	0.0106	0.0006
Thr	0.0005	0.0113	0.0005
Trp	0.0007	0.0158	0.0008
Tyr	0.0008	0.0147	0.0009
Val	0.0005	0.0119	0.0006
Table S3	-	ApA	+	-	ApC	+	-	ApG	+	-	CpC	+	-	CpG	+	-	CpU	+	-	GpA	+	-	GpC	+	-	GpG	+	-	UpC	+	-	UpU	+
Ring nitrogen volume fraction	0.0019	0.0162	0.003	0.00158153	0.0146985	0.00255847	0.00204613	0.0159039	0.00260387	0.0015	0.0129	0.0022	0.0016	0.0146	0.0022	0.0014	0.0117	0.0022	0.0021	0.016	0.0025	0.0015	0.0148	0.0024	0.00224993	0.0158501	0.00269007	0.0015044	0.0115356	0.0019556	0.00118453	0.0103855	0.00191547
Dinucleotide volume fraction	0.0022	0.0288	0.0031	0.002191	0.027809	0.003719	0.0026498	0.0287002	0.0031002	0.0026	0.0267	0.003	0.0025	0.0279	0.0032	0.0024	0.0261	0.0028	0.0028	0.0282	0.0039	0.0023	0.0277	0.0034	0.00292493	0.0283151	0.00337507	0.00236873	0.0259713	0.00305127	0.00243133	0.0257087	0.00334867

## Sheet: Charge state 0
Alpha Carbon distance	-	AMP	+	-	CMP	+	-	GMP	+	-	UMP	+
Gly	1.2363	29.8856	1.2695	1.029	31.7615	1.033	1.0269	31.0082	1.03282	1.13573	31.5664	1.14069	Units: Percentage of simulation within a 5A distance threshold
L-Ala	1.0831	31.1602	1.1041	1.1775	32.3294	1.2034	1.08829	33.4479	1.10739	1.05958	32.4681	1.07956
L-Arg	1.5437	37.825	1.5561	1.6206	38.4205	1.6495	1.79475	43.5136	1.79072	1.83528	41.44	1.85245
L-Asn	1.3294	36.8631	1.3134	1.4026	35.7775	1.4292	1.49787	38.8056	1.58682	1.28139	36.3863	1.32135
L-Asp	1.4551	33.8905	1.4854	1.4832	35.6334	1.5125	1.6589	36.3684	1.70237	1.86316	39.8504	1.89052
L-Cys	1.312	39.2766	1.3246	1.1801	36.6039	1.1735	1.41295	40.2385	1.38622	1.24336	37.7233	1.25877
L-Gln	1.3206	35.6313	1.3344	1.4173	35.0107	1.468	1.35357	38.3676	1.35328	1.92654	37.5069	1.98149
L-Glu	1.2998	30.1418	1.2999	1.4157	30.6498	1.4178	1.52408	33.7	1.5375	1.20587	32.9267	1.21784
L-His	1.2891	32.3644	1.2642	1.5785	36.4234	1.6133	1.54846	40.1034	1.52323	1.99246	37.1439	1.9566
L-Ile	1.2974	31.4011	1.3195	1.4179	31.8558	1.4518	3.8819	23.7236	3.99639	1.3514	32.6872	1.36794
L-Leu	1.4831	34.0591	1.5075	1.5708	34.0586	1.5753	1.32654	35.1943	1.32231	1.243	34.1033	1.26721
L-Lys	1.4355	34.7999	1.4446	1.4153	35.3891	1.4391	1.4385	32.1834	1.409	1.22818	31.3702	1.24838
L-Met	1.6879	43.3771	1.6986	2.1492	42.0043	1.9999	1.5957	46.09	1.58011	1.5662	45.4015	1.57292
L-Phe	1.7665	44.7244	1.8101	1.5001	43.8658	1.5131	1.67644	56.0211	1.69068	1.91565	45.8105	1.89799
L-Pro	1.3517	30.6612	1.3596	1.2634	32.2753	1.2774	1.30656	35.6875	1.294	1.42038	33.0529	1.46001
L-Ser	1.1514	32.3907	1.1549	1.3687	33.4127	1.3969	2.00668	33.654	1.94292	1.212	33.8456	1.22888
L-Thr	1.189	32.0167	1.1727	1.2307	32.6004	1.2545	1.29542	34.7255	1.29542	1.48447	33.7835	1.50409
L-Trp	1.7569	53.5786	1.7576	2.2573	52.327	2.2152	2.03518	64.8613	2.03518	2.13583	57.7253	2.07368
L-Tyr	1.7456	47.6529	1.7109	1.6424	48.2551	1.6807	1.90619	57.5501	1.90619	1.88224	52.5761	1.89206
L-Val	1.0107	30.2032	1.0104	1.1693	30.3365	1.2009	1.20039	33.0884	1.20039	1.18137	31.5005	1.18041
S5 Surface distance	-	AMP	+	-	CMP	+	-	GMP	+	-	UMP	+
Gly	1.3511	46.4892	1.371	1.153	47.7921	1.1449	1.13226	47.2986	1.11336	1.28061	47.1508	1.25835	Units: Percentage of simulation within a 5A distance threshold
L-Ala	1.2007	50.9897	1.1798	1.307	51.9573	1.3207	1.16334	52.9895	1.17555	1.21455	51.0852	1.2238
L-Arg	1.4996	74.2796	1.4678	1.6879	73.9753	1.6834	1.49701	78.3907	1.47842	1.66034	76.5554	1.62958
L-Asn	1.4458	62.3498	1.422	1.4295	61.1629	1.4258	1.48727	63.7437	1.4866	1.42856	61.2181	1.42532
L-Asp	1.6178	58.7947	1.6307	1.7029	59.6965	1.6953	1.71841	58.166	1.70549	1.79068	61.7305	1.76762
L-Cys	1.3815	62.6785	1.3826	1.3069	59.5388	1.3019	1.56057	63.233	1.52762	1.33552	59.7988	1.34052
L-Gln	1.391	66.1539	1.3716	1.4801	64.7105	1.4975	1.34842	67.4081	1.34829	1.98526	65.8252	1.97235
L-Glu	1.5613	57.5119	1.5526	1.5928	57.7006	1.6122	1.6681	61.6807	1.67171	1.37148	59.4884	1.38786
L-His	1.4622	63.5124	1.4445	1.5444	65.4179	1.5342	1.46726	69.6376	1.45007	2.19009	66.6169	2.21285
L-Ile	1.4251	63.5497	1.4472	1.3156	63.3149	1.3587	4.55824	47.6443	4.51726	1.54988	63.0247	1.55189
L-Leu	1.4743	65.1203	1.4867	1.8302	63.3087	1.7772	1.45915	65.4218	1.46769	1.45928	63.2189	1.45664
L-Lys	1.4299	65.2565	1.4219	1.419	65.8568	1.4024	1.49938	63.9666	1.46796	1.25869	61.3991	1.22583
L-Met	1.8207	69.0338	1.867	2.6055	70.6423	2.332	1.56762	75.0643	1.53022	1.51707	73.5287	1.50429
L-Phe	1.6572	76.7564	1.6167	1.4523	74.6674	1.4563	1.41806	83.8343	1.36542	1.80419	75.9931	1.73058
L-Pro	1.4153	56.0609	1.4071	1.2909	56.4952	1.2725	1.31656	59.5127	1.28649	1.57523	57.0157	1.5884
L-Ser	1.2481	53.4826	1.2358	1.3902	54.2364	1.3856	2.62617	54.0591	2.3479	1.38959	53.8498	1.36632
L-Thr	1.3836	57.8304	1.4043	1.3083	57.3635	1.3187	1.40202	59.5617	1.38042	1.62858	57.6781	1.63487
L-Trp	1.5736	85.3442	1.5115	1.8132	83.2813	1.7493	1.28038	90.0264	1.21795	1.60399	86.6186	1.50921
L-Tyr	1.6899	79.0407	1.6321	1.4174	78.926	1.4093	1.33871	86.028	1.28992	1.46703	81.866	1.43132
L-Val	1.2369	58.8779	1.2505	1.3412	58.3242	1.34	1.46427	61.1044	1.43148	1.35485	58.5861	1.32919
S6 Ring Interactions	-	AMP	+	-	CMP	+	-	GMP	+	-	UMP	+
Gly	1.13584	23.5562	1.16746	0.743068	19.8925	0.74296	0.870706	23.8907	0.864374	0.77486	16.8579	0.778703	Units: Percentage of simulation within a 5A distance threshold
L-Ala	0.950162	26.0438	0.959533	0.941783	23.0798	0.967039	0.99276	28.9259	1.01262	0.848046	19.7293	0.877433
L-Arg	1.76736	51.4612	1.76732	1.8589	46.1105	1.87501	1.80636	60.4322	1.79668	2.12843	46.5715	2.13704
L-Asn	1.39529	36.6496	1.39066	1.24783	30.9526	1.27567	1.62805	41.0694	1.71168	1.26323	28.875	1.27069
L-Asp	1.37064	33.9541	1.41761	1.31248	30.7853	1.34799	1.42063	30.0756	1.46977	1.91137	28.5391	1.96065
L-Cys	1.37279	37.2885	1.39412	0.998358	30.5655	0.997586	1.43092	40.7926	1.40525	1.19157	28.433	1.21525
L-Gln	1.35146	40.4154	1.37467	1.45688	34.9569	1.47453	1.42058	44.6619	1.43576	1.77926	34.682	1.79823
L-Glu	1.12054	26.4839	1.12534	1.13185	23.6661	1.1429	1.41375	34.0993	1.42455	1.01402	22.9406	1.00968
L-His	1.39869	38.0274	1.38769	1.56583	35.4843	1.60473	1.71761	46.4425	1.68392	1.84429	34.6299	1.88346
L-Ile	1.56178	38.2897	1.58695	1.31278	33.5803	1.32672	4.25993	27.7788	4.3815	1.48726	31.3132	1.51603
L-Leu	1.518	41.1446	1.52002	1.60162	35.7948	1.60665	1.64599	43.8467	1.64695	1.31198	32.3023	1.33879
L-Lys	1.51908	38.9691	1.53509	1.304	34.6193	1.31912	1.51179	38.3355	1.51936	1.07275	25.8859	1.09284
L-Met	1.85618	51.6608	1.84404	2.42562	44.1571	2.30251	1.92841	56.7873	1.92031	1.76797	46.4595	1.79385
L-Phe	2.05197	56.5705	2.055	1.73173	50.9084	1.77346	1.92704	70.4602	1.86877	2.11855	51.3833	2.05918
L-Pro	1.1054	29.0514	1.1248	1.04679	25.4323	1.05644	1.27615	34.548	1.28035	1.14667	23.0486	1.16194
L-Ser	1.04566	28.5706	1.05194	1.02094	23.9788	1.0402	1.82759	30.8795	1.78981	1.09148	22.7729	1.09808
L-Thr	1.10871	32.1518	1.11047	1.13694	28.2998	1.17053	1.28801	35.9977	1.31309	1.33847	26.0281	1.39372
L-Trp	2.0752	69.8055	2.0539	2.34933	64.0609	2.35713	2.0163	81.6565	1.93809	2.43481	69.0017	2.37737
L-Tyr	1.9789	61.3143	1.9729	1.85234	56.0949	1.85879	2.00001	74.057	1.95575	2.03725	60.3797	2.05261
L-Val	1.1448	32.7137	1.1431	1.19228	28.4052	1.21163	1.3247	36.962	1.3333	1.18098	26.3864	1.17429
S7 Surface size adjusted	-	AMP	+	-	CMP	+	-	GMP	+	-	UMP	+
Gly	7653.22	263335	7765.95	6812.01	282359	6764.15	6480.4	270711	6372.26	7818.12	287856	7682.21	Units: Percentage of simulation within a 5A distance threshold adjusted by molecular volume
L-Ala	6127.9	260231	6021.23	6957.31	276575	7030.24	5999.06	273255	6062.04	6680.7	280996	6731.6
L-Arg	4987.03	247022	4881.28	5854.67	256591	5839.06	5030.28	263410	4967.79	5951.04	274392	5840.79
L-Asn	6480.5	279470	6373.82	6683.03	285942	6665.73	6735.81	288694	6732.78	6901.25	295740	6885.6
L-Asp	7251.46	263535	7309.28	7961.2	279086	7925.67	7782.66	263433	7724.15	8650.62	298215	8539.23
L-Cys	6593.64	299153	6598.89	6505.87	296390	6480.98	7525.89	304943	7366.98	6869.94	307607	6895.68
L-Gln	5558.22	264341	5480.7	6168.63	269695	6241.14	5444.2	272158	5443.69	8549.79	283485	8494.18
L-Glu	6596.67	242994	6559.91	7019.21	254277	7104.71	7121.33	263323	7136.75	6245.36	270895	6319.93
L-His	5709.93	248018	5640.82	6290.32	266446	6248.78	5789.36	274770	5721.54	9217.55	280374	9313.34
L-Ile	5694.48	253935	5782.79	5483.04	263878	5662.67	18403.7	192362	18238.3	6674.76	271424	6683.4
L-Leu	5801.13	256238	5849.93	7511.29	259824	7293.77	5801.33	260106	5835.27	6188.64	268104	6177.44
L-Lys	5227.39	238563	5198.14	5410.66	251113	5347.37	5538.48	236283	5422.44	4959.39	241919	4829.9
L-Met	7164.16	271637	7346.34	10693.2	289922	9570.71	6232.58	298443	6083.91	6433.7	311827	6379.54
L-Phe	5973.61	276679	5827.63	5460.18	280726	5475.22	5164.85	305341	4973.12	7009.27	295234	6723.31
L-Pro	6399.44	253486	6362.36	6088	266437	6001.23	6014.98	271896	5877.58	7676.54	277854	7740.72
L-Ser	6069.34	260079	6009.53	7051.13	275088	7027.79	12903.7	265621	11536.4	7282.97	282232	7161.01
L-Thr	6311.47	263801	6405.89	6224.66	272926	6274.15	6462.11	274529	6362.55	8006.79	283570	8037.7
L-Trp	5133.76	278429	4931.16	6169.87	283385	5952.43	4220.67	296764	4014.86	5639.89	304566	5306.63
L-Tyr	5925.73	277161	5723.05	5183.97	288662	5154.34	4743.17	304804	4570.3	5544.33	309395	5409.37
L-Val	5357.79	255037	5416.7	6059.46	263505	6054.03	6408.74	267439	6265.24	6325.15	273511	6205.39
S8 Ring size adjusted	-	AMP	+	-	CMP	+	-	GMP	+	-	UMP	+
Gly	14183.8	294159	14578.7	11665.1	312284	11663.4	10873	298336	10793.9	15205.3	330807	15280.7	Units: Percentage of simulation within a 5A distance threshold adjusted by molecular volume
L-Ala	10690.4	293022	10795.8	13320.8	326447	13678.1	11169.7	325448	11393.1	14993.7	348820	15513.3
L-Arg	12957.2	377282	12956.9	17132.7	424981	17281.2	13243.1	443051	13172.1	24521.1	536538	24620.2
L-Asn	13787.5	362150	13741.7	15501	384504	15846.8	16087.5	405824	16913.9	19615.4	448369	19731.2
L-Asp	13543.9	335515	14008	16304	382426	16745.2	14037.9	297190	14523.4	29679.6	443154	30444.9
L-Cys	14444.4	392345	14668.8	13205.8	404305	13195.6	15055.9	429215	14785.9	19701.9	470122	20093.4
L-Gln	11905	356020	12109.5	16133.8	387119	16329.2	12513.9	393428	12647.7	24629.9	480094	24892.5
L-Glu	10437.2	246683	10481.9	13253.5	277121	13382.9	13168.3	317616	13268.9	14842.2	335782	14778.6
L-His	12041.1	327371	11946.3	16946.3	384029	17367.2	14786.6	399815	14496.6	24949.8	468478	25479.7
L-Ile	13757.8	337295	13979.5	14538	371874	14692.3	37525.8	244704	38596.7	20587.8	433461	20986
L-Leu	13168	356910	13185.4	17465.8	390347	17520.7	14278.2	380350	14286.5	17884.2	440326	18249.6
L-Lys	12242.8	314065	12371.8	13211.8	350753	13364.9	12184	308958	12245	13586	327836	13840.4
L-Met	16101.5	448134	15996.2	26451.7	481539	25109.1	16728.1	492604	16657.8	24100	633308	24452.6
L-Phe	16306.2	449543	16330.3	17300	508575	17716.9	15313.4	559919	14850.3	26455.5	641650	25714.1
L-Pro	11018.7	289587	11212.1	13117.7	318700	13238.7	12720.8	344378	12762.6	17961.5	361037	18200.9
L-Ser	11209.9	306288	11277.3	13759.3	323164	14018.9	19592.5	331041	19187.5	18387.5	383641	18498.6
L-Thr	11149.6	323329	11167.3	14373.5	357773	14798.2	12952.6	362004	13204.8	21151.5	411316	22024.6
L-Trp	14925.2	502053	14772	21241.7	579212	21312.2	14501.6	587288	13939.1	27518.2	779856	26869
L-Tyr	15297.6	473982	15251.2	18001.4	545140	18064	15460.8	572488	15118.7	24747.9	733476	24934.6
L-Val	10932	312392	10915.8	14313.1	340998	14545.4	12650	352960	12732	17721.8	395954	17621.4

## Sheet: Charge state -1
S9 Alpha Carbon distance	-	AMP	+	-	CMP	+	-	GMP	+	-	UMP	+
Gly	1.05755	30.1117	1.07437	1.13667	30.3225	1.14605	1.4218	36.9769	1.4518	1.30808	32.4464	1.28725	Units: Percentage of simulation within a 5A distance threshold
L-Ala	1.08091	31.0047	1.08013	1.01734	29.0121	1.02466	1.3748	34.6862	1.3995	1.04545	29.3491	1.0626
L-Arg	1.81158	44.1582	1.84779	1.98722	44.5448	1.98115	2.226	43.1502	2.2021	2.71061	31.5786	2.76765
L-Asn	1.28204	34.058	1.33572	2.10534	31.9734	2.07048	1.9041	37.875	1.9467	1.1704	32.5314	1.16839
L-Asp	1.16617	23.8573	1.18667	1.00477	24.9541	1.00222	1.5798	36.5808	1.5602	1.31384	32.2387	1.3205
L-Cys	1.334	33.4333	1.33227	1.1678	32.6558	1.16612	1.4574	35.4244	1.4912	1.29536	34.9473	1.32585
L-Gln	1.45629	32.1635	1.47735	1.1621	31.3636	1.13137	1.5977	37.3679	1.6198	1.28624	33.7506	1.27731
L-Glu	1.21104	25.5921	1.21176	1.31932	24.7596	1.34027	2.1501	41.5166	2.1468	1.56318	30.6759	1.59188
L-His	1.39105	32.2474	1.43865	1.84366	33.0301	1.77253	1.7104	37.536	1.7183	1.39511	33.2509	1.44722
L-Ile	1.0842	28.1109	1.10887	1.45157	27.2635	1.4272	1.6728	32.1491	1.7194	1.40008	29.5518	1.43147
L-Leu	1.28294	28.0001	1.29689	1.3784	27.3622	1.40821	1.4071	31.9143	1.4308	1.25818	29.252	1.25812
L-Lys	1.49519	31.7219	1.54824	1.42543	31.8066	1.459	1.5027	33.0284	1.5322	1.41614	32.6951	1.42785
L-Met	1.50946	35.197	1.50392	1.44463	34.6431	1.43513	1.4576	35.0811	1.471	1.53679	36.6509	1.59036
L-Phe	1.71365	37.3542	1.73114	1.37482	35.5869	1.3632	1.7037	34.5784	1.7325	1.70983	38.8914	1.70353
L-Pro	1.30662	27.6467	1.31436	1.19931	27.1413	1.21199	3.3162	57.7142	3.2872	1.18366	28.838	1.2119
L-Ser	1.21531	32.7854	1.23665	1.30204	31.2836	1.32007	1.8178	39.9696	1.8418	1.21507	33.0062	1.24616
L-Thr	1.38703	29.8804	1.40956	1.18486	27.9593	1.18449	1.501	35.1682	1.5273	1.23543	29.6214	1.22378
L-Trp	1.96608	42.3243	2.00616	1.92663	41.9963	1.90633	2.54	45.9684	2.579	2.01066	47.1045	2.02086
L-Tyr	1.8878	38.7089	1.94437	1.66387	39.6876	1.6613	1.8421	35.3294	1.8913	1.82484	44.318	1.87154
L-Val	1.10349	26.9946	1.12277	1.26331	26.0795	1.30522	1.6679	31.4562	1.6813	1.11018	26.6802	1.11026
S10 Surface distance	-	AMP	+	-	CMP	+	-	GMP	+	-	UMP	+
Gly	1.12427	47.3914	1.13498	1.27113	47.1977	1.2701	1.4609	53.1724	1.446	1.3617	48.9618	1.33377	Units: Percentage of simulation within a 5A distance threshold
L-Ala	1.23822	51.4044	1.24058	1.15811	48.988	1.15936	1.3944	54.5325	1.38	1.19568	48.7942	1.20824
L-Arg	1.6794	83.9574	1.64107	1.4807	83.4961	1.38496	1.7205	79.6266	1.6935	3.12231	63.4005	3.06467
L-Asn	1.34636	61.2694	1.34788	2.23565	58.1208	2.17833	1.8378	63.0402	1.8543	1.28782	58.5655	1.28782
L-Asp	1.44504	46.9262	1.44881	1.23811	47.8297	1.2379	1.553	62.1753	1.5249	1.46923	58.3347	1.44631
L-Cys	1.48539	57.2627	1.46138	1.32732	56.3994	1.32204	1.4963	58.7863	1.4996	1.34351	57.8834	1.37601
L-Gln	1.54315	62.7345	1.54307	1.25372	60.9906	1.26062	1.5664	66.4653	1.5703	1.43937	62.7259	1.40634
L-Glu	1.48047	51.9689	1.4629	1.60139	51.1933	1.63607	2.6112	76.1365	2.5605	1.76144	62.0959	1.80167
L-His	1.34747	61.7582	1.35289	2.01277	62.3034	1.86919	1.5251	67.4012	1.5311	1.48136	61.9452	1.49722
L-Ile	1.17022	59.2151	1.16984	1.81786	57.5847	1.66979	1.585	60.5879	1.5975	1.55419	59.4017	1.57287
L-Leu	1.59278	59.358	1.57948	1.57579	57.1272	1.58546	1.411	59.5088	1.3969	1.5222	59.0452	1.48827
L-Lys	1.59555	68.0682	1.58975	1.58465	67.6124	1.58771	1.497	63.415	1.4887	1.4487	68.8062	1.42016
L-Met	1.64369	65.3893	1.61485	1.57056	63.6586	1.55037	1.5511	62.9215	1.5382	1.62164	65.1685	1.62807
L-Phe	1.77111	69.7697	1.73094	1.57756	67.473	1.57131	1.6957	64.7401	1.6928	1.91822	69.6709	1.87297
L-Pro	1.61601	54.3064	1.59725	1.43699	53.303	1.40835	2.4708	73.6289	2.3892	1.27248	54.7066	1.28729
L-Ser	1.32874	54.7493	1.34716	1.36993	53.0989	1.39604	1.7196	60.3543	1.7538	1.27996	54.5256	1.28569
L-Thr	1.46923	55.1878	1.48042	1.39128	53.6923	1.40872	1.5025	59.6391	1.4917	1.49076	54.7036	1.46421
L-Trp	1.62584	78.3745	1.5869	1.81899	77.4756	1.7567	1.9084	77.9759	1.8933	1.65552	78.9173	1.64284
L-Tyr	1.75916	73.1003	1.72352	1.61225	72.8531	1.5871	1.8188	68.895	1.8169	1.65981	77.119	1.64562
L-Val	1.36142	55.6954	1.36562	1.55592	53.8712	1.56086	1.6531	57.568	1.6511	1.41601	53.817	1.41898
S11 Ring Interactions	-	AMP	+	-	CMP	+	-	GMP	+	-	UMP	+
Gly	0.896732	23.0969	0.920708	0.862212	19.3002	0.863046	1.43654	30.3732	1.46198	0.926908	18.0172	0.946159	Units: Percentage of simulation within a 5A distance threshold
L-Ala	1.02511	26.8728	1.04687	0.821298	22.3621	0.817609	1.38682	31.3132	1.41649	0.860596	18.8879	0.88958
L-Arg	2.37678	63.7789	2.33981	2.06687	58.2068	2.05007	2.4978	54.9412	2.51547	3.34763	40.6916	3.36328
L-Asn	1.25074	36.6474	1.30052	1.9046	29.2526	1.97659	2.37399	46.3826	2.4569	1.20751	27.3805	1.25002
L-Asp	1.01565	21.6584	1.04955	0.87982	19.7561	0.887615	1.70136	38.2661	1.69629	1.20433	26.9683	1.2241
L-Cys	1.31228	33.8613	1.31823	1.10628	29.0379	1.09641	1.56459	34.5409	1.57122	1.2228	28.063	1.24714
L-Gln	1.51907	38.2115	1.5304	1.12538	32.2806	1.15254	1.61646	42.3028	1.64528	1.27403	31.5519	1.27457
L-Glu	1.11733	25.9475	1.12718	1.12398	21.7557	1.14282	3.76433	61.3563	3.75756	1.51352	24.5666	1.55529
L-His	1.46983	36.9398	1.48153	1.92042	33.3271	1.90673	1.85218	42.7572	1.88599	1.48597	31.4059	1.49448
L-Ile	1.29335	35.4658	1.30379	1.48334	31.0584	1.46148	1.65672	36.001	1.71692	1.49342	29.9388	1.52636
L-Leu	1.44006	35.8954	1.45419	1.46038	30.9358	1.49894	1.4741	35.579	1.48301	1.29447	29.8631	1.29403
L-Lys	1.62066	39.3542	1.65715	1.55304	34.4052	1.56561	1.59356	38.2988	1.61767	1.34977	29.2069	1.35062
L-Met	1.70564	43.9157	1.69573	1.5238	39.9298	1.52505	1.46314	39.111	1.48783	1.60252	39.0279	1.63696
L-Phe	2.01042	50.4408	2.01474	1.74781	44.7413	1.77901	1.85919	40.8049	1.89619	2.21289	46.9694	2.17333
L-Pro	1.27428	28.9325	1.28309	1.02935	24.3585	1.04497	3.50995	58.4482	3.48175	0.99319	23.2057	1.00846
L-Ser	1.12678	30.1588	1.15898	1.12768	24.2165	1.1394	1.92281	38.2059	1.96008	0.990443	22.4113	1.0241
L-Thr	1.27495	31.6416	1.29434	1.03015	25.1347	1.04376	1.45395	36.1697	1.45971	1.09375	24.4914	1.10065
L-Trp	2.23443	62.1796	2.21454	2.3668	56.9949	2.30891	2.788	60.6226	2.7725	2.26427	60.0028	2.25173
L-Tyr	2.04937	54.6492	2.08019	1.97654	51.1045	1.96641	1.8954	46.1051	1.8901	2.18635	55.731	2.1927
L-Val	1.25287	31.3347	1.28446	1.2232	26.785	1.24163	1.7336	33.6591	1.7535	1.12515	24.4827	1.13465
S12 Surface size adjusted	-	AMP	+	-	CMP	+	-	GMP	+	-	UMP	+
Gly	6434.7	271242	6496.01	7674.97	284976	7668.75	8190.74	298118	8107.2	8406.61	302270	8234.15	Units: Percentage of simulation within a 5A distance threshold adjusted by molecular volume
L-Ala	6385.2	265080	6397.36	6300.26	266500	6307.03	7043.85	275472	6971.11	6650.82	271410	6720.68
L-Arg	5643.14	282115	5514.36	5248.85	295980	4909.47	5663.27	262102	5574.39	11316.8	229795	11107.9
L-Asn	6097.65	277488	6104.53	10681.6	277692	10407.7	8153.5	279681	8226.71	6291.24	286104	6291.24
L-Asp	6544.56	212528	6561.62	5915.49	228522	5914.45	6889.97	275844	6765.31	7177.49	284976	7065.51
L-Cys	7163.34	276151	7047.54	6752.74	286932	6725.88	7068.69	277713	7084.28	6988.69	301100	7157.79
L-Gln	6230.42	253288	6230.09	5339.96	259778	5369.37	6195.22	262875	6210.65	6268.48	273173	6124.66
L-Glu	6320.3	221862	6245.29	7212.15	230559	7368.38	10920	318403	10708	8111.26	285946	8296.51
L-His	5316.7	243680	5338.12	8378.17	259338	7780.51	5894.79	260518	5917.98	6304.75	263641	6372.25
L-Ile	4724.74	239079	4723.2	7742.82	245271	7112.15	6268.79	239629	6318.22	6768.54	258696	6849.86
L-Leu	6332.64	235997	6279.72	6609.31	239608	6649.88	5495.4	231768	5440.49	6527.99	253217	6382.5
L-Lys	5893.73	251434	5872.29	6175.08	263473	6187.03	5416.85	229465	5386.81	5772.18	274150	5658.46
L-Met	6535.01	259976	6420.38	6587.36	267002	6502.68	6041.05	245060	5990.81	6954.45	279477	6982.04
L-Phe	6450.71	254115	6304.41	6061.5	259252	6037.48	6050.02	230984	6039.67	7536.03	273713	7358.27
L-Pro	7383.08	248110	7297.36	6925.93	256907	6787.89	11058	329524	10692.8	6270.84	269597	6343.83
L-Ser	6528.81	269012	6619.31	7101.02	275238	7236.38	8276.86	290500	8441.47	6783.78	288984	6814.15
L-Thr	6771.91	254368	6823.47	6764.94	261073	6849.76	6783.91	269275	6735.15	7411.54	271968	7279.58
L-Trp	5359.44	258355	5231.07	6325.61	269424	6108.97	6162.49	251795	6113.73	5886.5	280605	5841.4
L-Tyr	6232.84	259001	6106.56	6026.19	272307	5932.19	6312.65	239119	6306.05	6343.38	294730	6289.16
L-Val	5958.58	243765	5976.96	7184.06	248736	7206.87	7087.55	246819	7078.97	6684.96	254069	6698.97
S13 Ring size adjusted	-	AMP	+	-	CMP	+	-	GMP	+	-	UMP	+
Gly	11198	288423	11497.4	13535.5	302987	13548.6	17938.8	379286	18256.5	18188.9	353557	18566.7	Units: Percentage of simulation within a 5A distance threshold adjusted by molecular volume
L-Ala	11533.6	302350	11778.5	11616.7	316296	11564.5	15603.3	352309	15937.1	15215.6	333945	15728.1
L-Arg	17425	467587	17154	19049.5	536468	18894.7	18312.3	402795	18441.9	38567.1	468797	38747.5
L-Asn	12359.1	362128	12851	23659.6	363387	24553.9	23458.4	458326	24277.7	18750.2	425163	19410.2
L-Asp	10036.1	214016	10371	10929.4	245417	11026.3	16811.8	378123	16761.8	18700.8	418762	19007.8
L-Cys	13807.7	356285	13870.2	14633.3	384099	14502.7	16462.4	363435	16532.2	20218.2	464004	20620.6
L-Gln	13381.5	336606	13481.3	12462.7	357482	12763.5	14239.4	372647	14493.3	17636.1	436765	17643.6
L-Glu	10407.3	241687	10499.1	13161.4	254751	13381.9	35062.6	571501	34999.7	22153.4	359582	22764.8
L-His	12653.5	318008	12754.2	20783.8	360683	20635.6	15945	368089	16236.1	20102.5	424864	20217.5
L-Ile	11393.2	312419	11485.1	16426.8	343947	16184.7	14594.1	317134	15124.4	20673.1	414436	21129
L-Leu	12491.8	311375	12614.4	15925.7	337359	16346.1	12787.2	308631	12864.5	17645.4	407075	17639.4
L-Lys	13061.4	317168	13355.5	15735	348584	15862.3	12843	308662	13037.3	17094.3	369895	17105.1
L-Met	14795.7	380948	14709.7	16617.2	435439	16630.8	12692.1	339270	12906.2	21844.6	532006	22314.1
L-Phe	15976	400833	16010.4	17460.7	446966	17772.3	14774.2	324260	15068.3	27633.5	586531	27139.4
L-Pro	12702.2	288402	12789.9	12899.2	305245	13094.9	34987.6	582618	34706.4	15557.5	363498	15796.6
L-Ser	12079.5	323315	12424.7	15197.9	326368	15355.8	20613.3	409583	21012.8	16685.4	377550	17252.3
L-Thr	12821.3	318198	13016.3	13023.4	317759	13195.5	14621.4	363734	14679.3	17284.3	387032	17393.3
L-Trp	16070.4	447207	15927.3	21399.6	515325	20876.2	20051.8	436008	19940.3	25590.8	678151	25449.1
L-Tyr	15842.4	422458	16080.7	19208.4	496642	19109.9	14652.1	356409	14611.2	26559.1	677005	26636.3
L-Val	11964	299224	12265.6	14684.3	321548	14905.6	16554.6	321420	16744.7	16884	367388	17026.6

## Sheet: Charge state -2
S14 Alpha Carbon distance	-	AMP	+	-	CMP	+	-	GMP	+	-	UMP	+
Gly	2.9655	48.4305	2.9613	2.5001	46.7835	2.5646	3.143	49.6705	3.1818	2.11749	35.8213	2.16062	Units: Percentage of simulation within a 5A distance threshold
Ala	1.3049	30.1334	1.3503	1.4374	31.048	1.4517	1.5312	29.2824	1.5727	1.35255	28.1542	1.39852
Arg	2.5811	62.0089	2.5346	2.6024	55.0811	2.5993	2.4563	51.7356	2.5056	2.68975	54.0208	2.68002
Asn	1.901	37.5313	1.9492	1.7342	31.6156	1.715	2.1044	38.6677	2.2084	1.61502	31.638	1.61055
Asp	1.7581	31.8651	1.8197	1.3308	27.8827	1.3556	2.28233	34.2105	2.4457	1.58492	27.4962	1.61443
Cys	1.4479	35.2986	1.459	1.3518	31.5767	1.3522	1.4461	33.446	1.4542	1.29966	30.5249	1.31378
Gln	1.9168	34.3386	1.9208	1.4831	31.5404	1.5004	1.70614	34.4521	1.76868	1.56396	28.6379	1.58529
Glu	1.5951	28.6905	1.5991	1.5472	27.8169	1.556	1.78083	31.68	1.79525	1.42208	25.2191	1.49053
His	2.4399	41.1342	2.5743	2.2165	35.8972	2.2804	2.38679	39.6994	2.4846	1.38382	29.3384	1.40336
Ile	1.7299	31.3415	1.7609	1.7249	28.2657	1.7543	2.19229	32.2848	2.26149	1.52424	26.9094	1.53946
Leu	1.4915	27.0051	1.5292	1.3817	25.0228	1.4161	1.53424	30.5196	1.57933	1.32679	26.2005	1.33511
Lys	2.1577	41.7922	2.22	2.0587	38.1221	2.0675	2.47697	42.7911	2.4589	1.7603	30.4503	1.78142
Met	2.0014	37.4187	2.0347	1.7079	33.0099	1.7074	2.3003	40.9685	2.39211	1.82411	32.1773	1.82144
Phe	1.8218	36.8769	1.8795	2.3654	32.6902	2.5145	2.03049	45.4114	2.09634	1.54267	31.728	1.53942
Pro	3.0886	46.19	3.2102	2.9961	40.0617	3.0667	3.26769	49.387	3.25715	3.23996	40.8678	3.3306
Ser	2.1825	36.3893	2.2678	2.038	36.1479	2.0909	2.20305	41.3237	2.31299	1.5958	30.329	1.6272
Thr	2.1215	36.817	2.2073	1.7562	30.4248	1.8242	1.82071	34.4686	1.85303	1.85173	28.5449	1.92577
Trp	2.3936	44.3426	2.4815	1.6232	31.5203	1.645	2.88898	57.2287	2.86032	2.04543	42.1579	2.05444
Tyr	2.2755	39.7041	2.28	2.471	35.5089	2.55	2.3581	47.5846	2.33908	1.81692	38.1231	1.83194
Val	1.5054	26.7625	1.538	1.2799	22.143	1.3054	1.68656	28.5821	1.70084	1.29686	24.0293	1.31758
S15 Surface distance	-	AMP	+	-	CMP	+	-	GMP	+	-	UMP	+
Gly	2.4602	62.4544	2.4061	2.109	60.7044	2.1066	2.5967	63.3923	2.6146	1.92502	51.2651	1.94417	Units: Percentage of simulation within a 5A distance threshold
Ala	1.2188	50.4209	1.2518	1.4981	50.6886	1.4825	1.622	49.4197	1.6155	1.42721	47.7352	1.44071
Arg	0.7134	96.4086	0.6528	0.9443	95.9248	0.8396	1.5061	92.1083	1.4078	1.32902	95.4019	1.03835
Asn	1.618	63.0451	1.6382	1.8397	57.7188	1.7864	1.8708	62.7315	1.9275	1.69938	56.4926	1.66287
Asp	2.1622	62.0805	2.19	1.642	57.2941	1.6543	2.40517	63.0669	2.43249	1.96077	54.8043	1.99044
Cys	1.4511	57.9658	1.4491	1.482	55.4322	1.4561	1.5419	56.4184	1.4949	1.48153	53.4006	1.481
Gln	1.7535	63.1589	1.7556	1.5049	60.5393	1.4996	1.66133	63.0571	1.68348	1.72185	57.2736	1.72941
Glu	1.803	61.636	1.7762	1.9249	61.4391	1.934	2.00831	64.7161	1.99526	1.95438	58.8542	1.97286
His	2.0071	69.3892	1.9971	1.9822	62.4003	2.0174	1.87241	66.4508	1.88823	1.57019	58.7242	1.55633
Ile	1.6794	58.7661	1.6452	1.8322	56.9837	1.8279	2.15594	59.361	2.13083	1.58411	55.2802	1.56513
Leu	1.5038	55.1981	1.5376	1.6346	53.639	1.6248	1.55431	58.3947	1.53882	1.4215	54.5897	1.39195
Lys	1.9865	87.195	1.86	2.4222	83.6656	2.2786	2.43714	86.384	2.30802	2.2668	78.2641	2.18243
Met	1.8147	64.8876	1.8192	1.742	60.2258	1.7214	1.96335	67.4725	1.95634	1.98547	60.7054	1.9315
Phe	1.5441	66.6488	1.57	2.3347	62.4477	2.3713	1.71189	73.3969	1.72239	1.73926	62.2713	1.71828
Pro	2.412	68.9217	2.4107	2.3144	62.9314	2.3088	2.44715	69.2468	2.43009	2.54546	62.473	2.54478
Ser	2.0822	57.8145	2.0992	1.7633	57.0858	1.7923	1.92437	61.8199	1.96679	1.52167	51.8966	1.52442
Thr	1.9758	60.6177	1.9861	1.5659	54.9527	1.593	1.6592	58.7271	1.65035	1.85105	52.575	1.87956
Trp	2.0975	75.3617	2.1069	1.7104	64.9492	1.6946	2.04951	83.1531	1.98062	2.00528	74.9327	1.98226
Tyr	2.3605	70.183	2.3101	2.2604	65.8919	2.2625	1.92044	76.5999	1.87503	2.05955	70.6109	2.01121
Val	1.696	54.1334	1.6886	1.5001	49.9393	1.4985	1.76701	54.8692	1.7395	1.58196	50.0971	1.53769
S16 Ring Interactions	-	AMP	+	-	CMP	+	-	GMP	+	-	UMP	+
Gly	1.8805	33.1813	1.88704	1.2437	25.9937	1.30973	2.6293	37.5102	2.77167	1.00927	17.8815	1.02777	Units: Percentage of simulation within a 5A distance threshold
Ala	1.15383	28.7728	1.16871	1.16832	25.4999	1.21369	1.38804	28.899	1.41402	1.00624	20.0467	1.03074
Arg	1.70706	85.3613	1.64166	1.98087	74.9029	1.92449	2.79586	74.7409	2.69815	2.53299	73.2494	2.38979
Asn	1.84258	43.1012	1.90366	4.15782	47.4216	4.30194	2.07877	43.6629	2.21127	1.47483	28.128	1.4507
Asp	1.86429	34.6701	1.93164	1.23416	26.092	1.25983	1.99725	35.4854	2.11924	1.11405	20.7532	1.15703
Cys	1.50542	37.9829	1.51856	1.2379	32.0813	1.23492	1.5487	37.2453	1.5453	1.30464	27.0786	1.31516
Gln	1.81874	43.4395	1.82118	1.52492	36.8543	1.55166	1.864	43.9274	1.88883	1.44393	30.0784	1.45809
Glu	1.67014	34.6656	1.66108	1.55732	29.2918	1.58773	2.00701	37.4481	2.03245	1.26762	21.0489	1.34148
His	1.83682	45.7151	1.88519	1.97058	38.1625	2.00882	2.23958	46.4397	2.32152	1.31946	30.241	1.32691
Ile	1.66517	37.986	1.69587	1.58504	31.3842	1.58395	2.24887	38.9423	2.28248	1.36762	28.2126	1.36162
Leu	1.60201	36.0621	1.64099	1.51434	30.797	1.53466	1.59525	38.9764	1.61582	1.37346	29.1019	1.38922
Lys	2.41272	55.3636	2.43973	2.00407	43.9884	2.01832	2.93986	58.291	2.8385	1.97605	34.5689	2.04827
Met	2.05821	47.4234	2.08867	1.80086	39.2022	1.81402	2.35553	51.465	2.38548	2.0581	38.2132	2.06045
Phe	1.85211	50.792	1.85216	2.17011	40.3808	2.27753	2.22384	59.8178	2.24318	1.81032	40.9597	1.78739
Pro	2.02236	38.811	2.06957	1.45498	30.4439	1.46217	2.34334	42.8125	2.3648	1.40754	23.9687	1.45797
Ser	1.83734	35.6579	1.90707	1.30771	29.0293	1.36078	1.96128	38.5903	2.0493	1.16154	21.6932	1.20667
Thr	1.77908	38.6469	1.84921	1.26632	28.7867	1.25677	1.63769	37.9959	1.66159	1.29913	24.4474	1.35253
Trp	2.50555	62.1941	2.55882	1.8821	45.3152	1.89474	2.81998	73.9049	2.70373	2.52443	56.3243	2.50991
Tyr	2.6638	56.1671	2.62126	2.68479	47.7455	2.72936	2.56246	64.2171	2.51298	2.39207	51.5214	2.40224
Val	1.58263	32.7938	1.624	1.23873	26.5824	1.2588	1.71538	34.0566	1.73185	1.29247	23.8479	1.27999
S17 Surface size adjusted	-	AMP	+	-	CMP	+	-	GMP	+	-	UMP	+
Gly	13947.6	779900	13640.9	12696.4	952973	12682	14540.2	791612	14640.4	11687.3	1.00599e+06	11803.6	Units: Percentage of simulation within a 5A distance threshold adjusted by molecular volume
Ala	6225.62	567292	6394.18	8125.78	716953	8041.16	8183.14	556027	8150.34	7807.09	843974	7880.9
Arg	2374.5	706808	2172.8	3337.52	884100	2967.47	4951.22	675281	4628.07	4737.19	1.0991e+06	3701.13
Asn	7258.59	622975	7349.21	8763.85	717004	8509.94	8289.34	619876	8540.57	8164.19	877214	7988.79
Asp	9699.95	613444	9824.67	7822.06	711728	7880.65	10657.1	623191	10778.1	9419.99	850998	9562.55
Cys	6931.79	609910	6922.23	7517.44	733230	7386.06	7274.83	593628	7053.08	7578.95	882946	7576.24
Gln	7012.74	556368	7021.14	6390.92	670424	6368.41	6562.31	555472	6649.78	7374.43	792824	7406.78
Glu	7624.43	574106	7511.1	8643.59	719427	8684.45	8388.06	602796	8333.55	8850.55	861448	8934.26
His	7844.52	597359	7805.44	8226.58	675328	8372.66	7227.98	572063	7289.04	6572.03	794429	6514
Ile	6716.39	517672	6579.62	7780.88	631049	7762.62	8516.03	522912	8416.84	6784.49	765229	6703.2
Leu	5922.3	478818	6055.41	6835.74	584940	6794.76	6045.82	506547	5985.59	5995.1	744135	5870.49
Lys	7268.44	702732	6805.58	9411.02	847676	8853.08	8807.49	696196	8340.87	8882.11	991187	8551.49
Met	7146.69	562870	7164.41	7284.88	656770	7198.73	7636.9	585292	7609.63	8373.61	827499	8145.99
Phe	5570.71	529631	5664.16	8944.18	623853	9084.4	6100.02	583255	6137.41	6719.7	777613	6638.63
Pro	10915.5	687019	10909.6	11121.9	788614	11095	10938.2	690259	10862	12336.3	978587	12333
Ser	10134.2	619795	10216.9	9113.1	769350	9262.97	9250.66	662734	9454.57	7931.12	874268	7945.46
Thr	9020.61	609591	9067.64	7591.56	694724	7722.95	7481.86	590579	7441.96	9050.25	830832	9189.65
Trp	6848.83	542015	6879.52	5930.43	587244	5875.65	6609.73	598052	6387.55	7011.97	846888	6931.48
Tyr	8284.35	542540	8107.46	8423.91	640349	8431.73	6656.94	592145	6499.53	7740.62	857761	7558.95
Val	7352.76	516935	7320.68	6905.88	599511	6898.51	7566.28	523961	7448.47	7344.64	751757	7139.09
S18 Ring size adjusted	-	AMP	+	-	CMP	+	-	GMP	+	-	UMP	+
Gly	10661.1	414352	10698.2	7487.21	408064	7884.73	14722.7	468409	15520	6127.56	350893	6239.88	Units: Percentage of simulation within a 5A distance threshold adjusted by molecular volume
Ala	5893.76	323726	5969.75	6337.05	360678	6583.11	7002.77	325146	7133.86	5504.27	354432	5638.33
Arg	5681.82	625816	5464.14	7001.16	690349	6801.89	9191.22	547954	8870.01	9028.65	843887	8518.21
Asn	8266.07	425901	8540.11	19806.7	589088	20493.3	9210.83	431451	9797.94	7085.44	436771	6969.51
Asp	8363.49	342590	8665.64	5879.2	324124	6001.48	8849.62	350647	9390.14	5352.15	322254	5558.65
Cys	7191.26	399652	7254.04	6279.25	424356	6264.15	7306.91	391891	7290.87	6674.01	447727	6727.84
Gln	7273.63	382659	7283.42	6475.92	408132	6589.51	7362.88	386957	7460.94	6184.14	416367	6244.78
Glu	7062.59	322891	7024.28	6992.98	342995	7129.53	8382.63	348809	8488.9	5740.51	308093	6074.98
His	7178.99	393553	7368.07	8178.36	413014	8337.05	8645.38	399791	8961.66	5522.62	409105	5553.77
Ile	6659.46	334619	6782.25	6731.24	347555	6726.62	8883.13	343044	9015.86	5857.31	390540	5831.59
Leu	6309.09	312822	6462.57	6332.81	335845	6417.81	6205.08	338102	6285.11	5792.51	396700	5858.95
Lys	8827.95	446193	8926.76	7786.44	445678	7841.82	10624.2	469785	10257.9	7742.85	437803	8025.84
Met	8105.69	411376	8225.64	7531.05	427505	7586.05	9162.36	446435	9278.88	8679.92	520900	8689.86
Phe	6681.94	403624	6682.11	8313.65	403405	8725.18	7924.26	475348	7993.14	6994.24	511485	6905.66
Pro	9152.18	386872	9365.86	6991.92	381503	7026.49	10474.2	426760	10570.1	6821.47	375449	7065.88
Ser	8942.43	382267	9281.8	6758.51	391230	7032.79	9428.07	413704	9851.21	6054.09	365452	6289.35
Thr	8122.46	388645	8442.65	6139.19	363928	6092.86	7384.87	382099	7492.64	6351.77	386337	6612.88
Trp	8181.2	447311	8355.14	6525.75	409722	6569.59	9094.51	531537	8719.61	8827.31	636576	8776.54
Tyr	9348.78	434192	9199.49	10005.5	463999	10171.6	8882.39	496422	8710.88	8990.37	625867	9028.59
Val	6861.28	313157	7040.62	5702.63	319116	5795.01	7345.22	325215	7415.7	6000.6	357862	5942.68

## Sheet: Dinucleotides
S19 Alpha carbon Distances	ApA	-	+	ApC	-	+	ApG	-	+	CpC	-	+	CpG	-	+	CpU	-	+	GpA	-	+	GpC	-	+	GpG	-	+	UpC	-	+	UpU	-	+
Glycine	36.6886	1.23891	1.28957	36.1897	1.20346	1.1813	40.9349	1.427	1.5143	36.1027	1.11782	1.12874	39.9611	1.37844	1.35179	37.1639	1.3618	1.35849	38.2251	1.23177	1.25086	36.5036	1.8983	1.74513	42.0876	1.50549	1.52948	36.3851	1.17683	1.1707	37.3182	1.161	1.14706
L-Alanine	38.3767	1.41779	1.45603	37.3019	1.07348	1.07758	40.2216	1.28499	1.37548	37.7777	1.15789	1.15206	42.2021	1.34761	1.40178	38.5645	1.09782	1.09493	40.1961	1.41234	1.4401	39.8311	1.20061	1.19249	41.8134	1.38618	1.36562	36.9329	1.29426	1.29267	38.1815	1.10999	1.12198
L-Arg	49.4004	2.48388	2.45104	47.498	1.75292	1.76223	56.4695	1.96465	1.97471	52.2727	1.99244	2.00947	60.7903	2.13757	2.18508	51.8264	1.88742	1.8986	55.888	1.93578	1.92203	47.2501	2.34956	2.38471	59.6294	2.11089	2.10132	53.7299	1.94777	1.96838	51.7991	2.02724	2.01506
L-Asp	29.7196	1.31485	1.31752	29.778	1.29804	1.31339	33.6834	1.43387	1.42821	27.6059	1.39381	1.3976	33.6305	1.52696	1.53664	31.9648	1.45871	1.46979	33.0026	1.56276	1.57589	32.6522	1.31116	1.32324	34.3126	1.44849	1.45661	30.4944	1.24728	1.26279	32.6072	1.37142	1.35341
L-Phe	53.8438	1.73618	1.7359	52.8375	1.68621	1.67211	59.5351	2.00062	2.00563	50.0469	1.7547	1.75877	57.6496	1.60688	1.60369	53.2979	1.85575	1.85334	59.6547	1.86496	1.84816	59.4882	2.07469	2.01758	63.7088	2.00328	1.98364	50.1615	1.73176	1.72995	55.1129	1.5246	1.50912
L-Ser	40.5968	1.61763	1.62975	38.3898	1.34782	1.31959	42.7117	1.50816	1.54305	38.0048	1.39746	1.41195	41.2208	1.24446	1.29369	39.0961	1.58831	1.60331	42.0771	1.67384	1.7163	40.3983	1.27076	1.25794	45.6239	1.47268	1.46811	40.3278	1.48043	1.50296	40.6406	1.19007	1.21911
S20 Surface Distances	ApA	-	+	ApC	-	+	ApG	-	+	CpC	-	+	CpG	-	+	CpU	-	+	GpA	-	+	GpC	-	+	GpG	-	+	UpC	-	+	UpU	-	+
Glycine	56.2558	1.26537	1.28238	55.4771	1.29218	1.26408	59.8718	1.31944	1.35552	54.9614	1.1489	1.16621	58.9908	1.27763	1.23577	55.9255	1.3063	1.30414	57.0411	1.23946	1.2366	55.4328	2.55069	2.18202	60.2173	1.40616	1.39125	55.2044	1.23002	1.21388	55.4547	1.21916	1.21189
L-Alanine	61.3347	1.40284	1.42657	60.0594	1.08914	1.08132	62.2095	1.18206	1.2148	59.6242	1.23057	1.2069	63.8503	1.2449	1.28052	60.6637	1.13636	1.12721	62.6296	1.33406	1.34519	61.5511	1.27354	1.25165	64.2769	1.23328	1.2151	58.9063	1.31781	1.33417	59.3034	1.1881	1.1767
L-Arg	86.4183	1.57502	1.48704	86.003	1.2134	1.203	88.9912	1.17108	1.11952	87.1657	1.31198	1.2562	90.676	1.05498	1.03173	87.0926	1.28201	1.24204	89.3164	1.08918	1.04417	84.0215	1.73548	1.66939	91.7877	1.0825	1.01853	88.3425	1.22011	1.18364	86.8682	1.31078	1.26121
L-Asp	55.7703	1.47868	1.44123	55.6674	1.53099	1.54205	59.09	1.47429	1.48444	53.415	1.50152	1.49876	59.3056	1.48971	1.50183	57.6089	1.52862	1.52657	58.9664	1.56408	1.59282	58.7353	1.44603	1.44114	59.8819	1.49193	1.48893	55.2531	1.45824	1.43857	56.182	1.36931	1.36454
L-Phe	85.8017	1.1795	1.14702	84.0223	1.29207	1.24814	87.9961	1.31398	1.23909	82.0251	1.3265	1.29988	85.9557	1.07478	1.05646	84.03	1.45165	1.3956	88.1703	1.23387	1.20124	88.0814	1.44827	1.37368	89.0618	1.24613	1.18256	81.5832	1.40163	1.33419	85.1909	1.20549	1.16483
L-Ser	64.7992	1.57991	1.56947	63.1375	1.38593	1.35234	66.0225	1.3388	1.34668	62.2975	1.38538	1.37089	65.0836	1.2527	1.2736	62.6693	1.55109	1.53843	65.6676	1.51414	1.51724	64.5817	1.27756	1.25172	68.2762	1.37831	1.34203	62.7085	1.49402	1.48594	63.7171	1.16119	1.17929
S21 Ring nitrogen distances	ApA	-	+	ApC	-	+	ApG	-	+	CpC	-	+	CpG	-	+	CpU	-	+	GpA	-	+	GpC	-	+	GpG	-	+	UpC	-	+	UpU	-	+
Glycine	35.8209	1.21456	1.28282	33.6284	1.05349	1.02918	39.5986	1.39511	1.47814	36.1027	1.11782	1.12874	39.9611	1.37844	1.35179	37.1639	1.3618	1.35849	38.2251	1.23177	1.25086	36.5036	1.8983	1.74513	40.0757	1.46182	1.49976	28.1865	1.01927	0.993874	27.1775	0.936975	0.937462
L-Alanine	40.6856	1.3516	1.37097	38.0696	1.10675	1.10805	42.3771	1.25065	1.31901	36.0641	1.16437	1.14543	42.327	1.38309	1.42775	34.9482	1.1022	1.12533	42.1859	1.40049	1.40968	41.1167	1.18165	1.16348	43.7591	1.47101	1.45169	32.7033	1.2494	1.26833	30.933	1.07289	1.07149
L-Arg	73.5407	2.3544	2.28237	71.0043	1.60285	1.58825	78.8939	1.7188	1.69557	72.2544	1.86368	1.82047	79.9631	1.81591	1.79374	70.6264	1.99137	1.96103	78.8098	1.72399	1.68317	72.192	2.28925	2.23364	82.3999	1.59732	1.57371	71.244	1.94971	1.96013	68.2706	2.05665	2.03108
L-Asp	33.9373	1.27513	1.27018	33.2175	1.20875	1.20926	38.5271	1.50956	1.52948	28.3289	1.19056	1.19939	36.5344	1.40514	1.46151	30.7737	1.44185	1.45644	37.8312	1.68773	1.6849	35.8173	1.26293	1.29069	39.2127	1.45012	1.45805	28.9083	1.22994	1.26059	29.4011	1.38229	1.35169
L-Phe	74.5924	1.71452	1.68685	72.1355	1.68748	1.64356	78.855	1.81077	1.75669	66.7835	1.71232	1.70855	74.4212	1.50298	1.50982	68.9961	1.9186	1.90612	79.1014	1.82464	1.77612	78.8362	2.06135	1.99673	80.8155	1.84475	1.77735	65.0706	1.90871	1.86719	69.1648	1.66918	1.62554
L-Ser	44.5345	1.61964	1.60785	41.2569	1.29588	1.27924	46.6592	1.56934	1.59761	37.8831	1.39636	1.41038	42.9257	1.23603	1.2702	37.3157	1.62538	1.64614	46.1311	1.53216	1.57462	43.143	1.22802	1.2137	48.6626	1.63482	1.59654	36.5553	1.44052	1.44461	35.0401	1.22263	1.23809
S22 Surface distances size adjusted	ApA	-	+	ApC	-	+	ApG	-	+	CpC	-	+	CpG	-	+	CpU	-	+	GpA	-	+	GpC	-	+	GpG	-	+	UpC	-	+	UpU	-	+
Glycine	214651	4828.17	4893.08	219223	5106.17	4995.15	229243	5052	5190.14	226206	4728.58	4799.82	232348	5032.22	4867.33	235466	5499.97	5490.88	222279	4829.94	4818.78	219910	10119	8656.39	233702	5457.29	5399.39	233582	5204.47	5136.19	237038	5211.23	5180.15
L-Alanine	210859	4822.73	4904.32	213833	3877.74	3849.88	214610	4077.87	4190.82	221101	4563.25	4475.48	226588	4417.83	4544.23	230127	4310.75	4276.05	219892	4683.87	4722.94	220006	4552.09	4473.84	224758	4312.44	4248.86	224568	5023.89	5086.25	228391	4575.65	4531.75
L-Arg	193589	3528.26	3331.18	199525	2815.04	2790.92	200046	2632.5	2516.6	210621	3170.19	3035.41	209680	2439.54	2385.78	215283	3168.97	3070.18	204339	2491.83	2388.86	195695	4042.12	3888.17	209139	2466.5	2320.74	219455	3030.93	2940.33	217996	3289.4	3165.01
L-Asp	168389	4464.61	4351.55	174067	4787.29	4821.85	179032	4466.85	4497.58	173962	4890.16	4881.16	184839	4643.01	4680.78	191934	5092.86	5086.01	181827	4822.95	4911.55	184383	4539.4	4524.07	183899	4581.78	4572.56	184998	4882.46	4816.6	190029	4631.52	4615.39
L-Phe	208337	2863.98	2785.12	211287	3249.12	3138.63	214409	3201.6	3019.13	214832	3474.24	3404.53	215444	2693.9	2647.97	225143	3889.42	3739.24	218644	3059.74	2978.81	222366	3656.24	3467.93	219957	3077.59	2920.57	219670	3774.03	3592.43	231727	3279.06	3168.45
L-Ser	212261	5175.27	5141.08	214188	4701.64	4587.69	217021	4400.72	4426.65	220117	4895.01	4843.81	220070	4235.82	4306.48	226521	5606.48	5560.72	219683	5065.37	5075.74	219950	4351.08	4263.07	227481	4592.22	4471.36	227786	5426.96	5397.63	233814	4261.08	4327.49
S23 Ring nitrogen distances size adjusted	ApA	-	+	ApC	-	+	ApG	-	+	CpC	-	+	CpG	-	+	CpU	-	+	GpA	-	+	GpC	-	+	GpG	-	+	UpC	-	+	UpU	-	+
Glycine	242985	8238.76	8701.78	251416	7876.23	7694.44	273612	9639.7	10213.4	307545	9522.28	9615.27	300776	10375.1	10174.5	349055	12790.4	12759.4	262535	8459.96	8591.05	271040	14094.9	12957.6	277849	10134.9	10398	268509	9709.73	9467.81	287569	9914.27	9919.42
L-Alanine	248659	8260.62	8379.01	256440	7455.14	7463.88	263820	7785.96	8211.5	276799	8936.74	8791.41	287041	9379.41	9682.3	295745	9327.27	9523.01	261051	8666.39	8723.26	275065	7905.04	7783.51	273348	9188.91	9068.23	280692	10723.6	10886.1	294899	10228.4	10215.1
L-Arg	292874	9376.32	9089.48	311660	7035.4	6971.34	320043	6972.56	6878.32	361362	9320.73	9104.64	353350	8024.33	7926.39	389448	10980.8	10813.5	317781	6951.59	6786.97	314699	9979.29	9736.87	335401	6501.73	6405.63	398452	10904.3	10962.6	424108	12776.2	12617.4
L-Asp	182165	6844.49	6817.94	196515	7150.98	7153.99	210652	8253.71	8362.63	190960	8025.33	8084.85	217596	8368.93	8704.62	228716	10716.1	10824.6	205605	9172.46	9157.05	210442	7420.27	7583.36	215128	7955.66	7999.15	217913	9271.39	9502.45	246173	11573.8	11317.5
L-Phe	321991	7401.03	7281.59	343195	8028.43	7819.47	346729	7962.05	7724.25	362029	9282.37	9261.95	356457	7198.89	7231.61	412385	11467.3	11392.7	345723	7974.83	7762.77	372501	9739.87	9434.56	356556	8139	7841.62	394465	11570.8	11319.1	465718	11239.4	10945.5
L-Ser	259343	9431.86	9363.2	264800	8317.42	8210.57	276776	9309.09	9476.81	277045	10211.8	10314.3	277369	7986.73	8207.55	300885	13105.8	13273.2	271999	9033.97	9284.29	275007	7827.75	7736.47	289640	9730.44	9502.6	298954	11780.8	11814.2	318297	11106.2	11246.6

## Sheet: Mean hydrophobicity regressions
S24 Whole molecule						S25 Rings						<- Fitted constants for the mean amino acid hydrophobicity vs volume adjusted interaction
Charge state: -2	Intercept	Coeff	Rsq	Pval		Charge state: -2	Intercept	Coeff	Rsq	Pval
AMP	500195	9208.9	0.39245	0.00312252		AMP	358529	3436.36	0.0638707	0.282363
CMP	585674	11865.5	0.378351	0.00389549		CMP	358072	5184.97	0.0892548	0.200718		Significant at 5% threshold
GMP	531043	7242.99	0.292971	0.0137154		GMP	404575	990.487	0.00562556	0.753315		Significant at 10% threshold
UMP	757407	10031.1	0.308968	0.0109356		UMP	479964	-3356.08	0.0176305	0.576807
Charge state: -1	Intercept	Coeff	Rsq	Pval		Charge state: -1	Intercept	Coeff	Rsq	Pval
AMP	556212	-228.166	0.000894597	0.900385		AMP	377123	-3970.62	0.101577	0.17082
CMP	678435	369.362	0.00166903	0.864216		CMP	423257	-5468.53	0.119796	0.134951
GMP	525345	6334.78	0.26692	0.0196809		GMP	313710	6857.36	0.209595	0.0423756
UMP	858938	1408.7	0.0168926	0.584964		UMP	529321	-8287.72	0.17632	0.065296
Charge state: 0	Intercept	Coeff	Rsq	Pval		Charge state: 0	Intercept	Coeff	Rsq	Pval
AMP	603497	-2329.28	0.137625	0.10733		AMP	423297	-6513.39	0.243116	0.0271736
CMP	745693	-1896.89	0.0822227	0.220298		CMP	468701	-7251.11	0.216439	0.0387322
GMP	608237	-1321.78	0.0141966	0.616842		GMP	468125	-7218.49	0.146202	0.0961522
UMP	948824	-3131.65	0.0865577	0.207992		UMP	591579	-11559.8	0.202366	0.0465777
S26 Whole molecule					S27 Rings					<- Statistical difference in lines of best fit between pairs of nucleotides
Charge state: -2					Charge state: -2
NMP comparison		Slope	Intercept		NMP comparison		Slope	Intercept
AMP	CMP	0.997286	0.997268		AMP	CMP	0.990819	1
AMP	GMP	0.944828	0.969038		AMP	GMP	0.975679	0.907191
AMP	UMP	0.928484	0.970382		AMP	UMP	0.657853	0.294564
CMP	GMP	0.87561	0.91558		CMP	GMP	0.891915	0.904722
CMP	UMP	0.851004	0.918002		CMP	UMP	0.472624	0.291347
GMP	UMP	0.999939	1		GMP	UMP	0.881386	0.690162
Charge state: -1					Charge state: -1
NMP comparison		Slope	Intercept		NMP comparison		Slope	Intercept
AMP	CMP	0.997372	0.977033		AMP	CMP	0.989883	0.848185
AMP	GMP	0.101966	0.570946		AMP	GMP	0.12791	0.680084
AMP	UMP	0.972818	0.728418		AMP	UMP	0.812824	0.0439648
CMP	GMP	0.153444	0.331645		CMP	GMP	0.0643693	0.224676
CMP	UMP	0.995252	0.922131		CMP	UMP	0.938461	0.250536
GMP	UMP	0.240282	0.100964		GMP	UMP	0.0142186	0.00167842
Charge state: 0					Charge state: 0
NMP comparison		Slope	Intercept		NMP comparison		Slope	Intercept
AMP	CMP	0.991137	0.871444		AMP	CMP	0.999202	0.900684
AMP	GMP	0.976312	0.99361		AMP	GMP	0.999303	0.903989
AMP	UMP	0.999868	0.36586		AMP	UMP	0.809254	0.0598088
CMP	GMP	0.999405	0.73601		CMP	GMP	1	1
CMP	UMP	0.996109	0.818569		CMP	UMP	0.871558	0.251487
GMP	UMP	0.986355	0.238305		GMP	UMP	0.869045	0.247673

## Sheet: Hydrophobicity scales
S28 Whole molecule interactions (Linear Regression P-val)					Charge state: 0				Charge state: -1				Charge state: 2
Scale ID	Name	Description	Order (hydrophobic->hydrophillic)	Trinquier score	AMP	CMP	GMP	UMP	AMP	CMP	GMP	UMP	AMP	CMP	GMP	UMP
Scale 1	Zimmerman	solubity data	LYFPIVKCMHRAEDTWSGNQ	2644	0.303321	0.372107	0.691759	0.629854	0.448806	0.49964	0.194666	0.840264	0.512694	0.527238	0.714399	0.62293		More significant correlation
Scale 2	Jones	Variant of zimmerman	WIFPYLVMKCHAREDGNSTQ	2530	0.226123	0.352878	0.717877	0.557665	0.702439	0.834247	0.148592	0.890239	0.145544	0.154685	0.214283	0.27406		Less significant correlation
Scale 3	Wolfenden	aqueos vs vapour phase distribution	GLIVAFCMTSWPYQKNEHDR	2434	0.13678	0.248918	0.627812	0.421207	0.675531	0.87109	0.0752713	0.905841	0.0475902	0.0516721	0.0792163	0.101994
Scale 4	Bull	aa vs water surface tension	LIYFWVMQNGHRDAEKSCTP	2372	0.0918857	0.18223	0.577037	0.295412	0.660724	0.839666	0.0642817	0.926908	0.0384369	0.0426168	0.0728526	0.0846201
Scale 5	von Heijne	transfer energy in protein conformation changes and accessible surface area	FILVWAMGTSYQCNPHKEDR	2338	0.0917618	0.198262	0.563619	0.308881	0.592937	0.779798	0.0836124	0.885674	0.0366343	0.0422431	0.069103	0.085014
Scale 6	Levitt	Ethanol/dioxane transfer energy	WFYLIVPMCHATGQNSDERK	2302	0.0630891	0.134471	0.490805	0.211654	0.581655	0.767416	0.0670549	0.927219	0.0261122	0.0282051	0.0547742	0.0610686
Scale 7	Frommel	Apolar accessible surface area	WFYMILPVHCKTRAEQSNGD	2280	0.0807943	0.170701	0.568795	0.252135	0.591245	0.798094	0.0638411	0.724957	0.024787	0.0249645	0.0490395	0.052465
Scale 8	Rekker	Assorted organic partitioning measures	WFILYVMPCRAKGDEHTSNQ	2280	0.0593601	0.118061	0.515287	0.177528	0.563734	0.745764	0.0721366	0.833421	0.0291138	0.0301237	0.056359	0.0616347
Scale 9	Krigbaum	Residue solubility in proteins	WFIMYKCVLPATSHDGENQR	2276	0.0467261	0.0952719	0.501598	0.147696	0.540776	0.702144	0.063281	0.931893	0.0322351	0.0318819	0.0631178	0.0588726
Scale 10	Efremov	Protein geometry data	IFLCMVWYHAGTNRDQSPEK	2268	0.0661023	0.11394	0.479851	0.166046	0.644573	0.811167	0.0542192	0.919203	0.026421	0.0265018	0.0593271	0.0455919
Scale 11	Nishikawa	Number of contacting residues in proteins	CVILWMYFAHGRTQSEPNKD	2264	0.0521881	0.105479	0.489155	0.141532	0.696665	0.912025	0.0523267	0.878507	0.00857415	0.010638	0.0220691	0.0250603
Scale 12	Guy	Protein geometry data	FMCVLIWHYTAGNSPDEQKR	2240	0.0759888	0.145063	0.569929	0.195657	0.682516	0.886212	0.0490599	0.802402	0.0123153	0.0143943	0.0310715	0.0280516
Scale 13	Meirovitch	Distance of amino acids to protein cores	FIVWMLCHYARNTPGDSEQK	2234	0.0985339	0.186837	0.63543	0.244107	0.705695	0.920147	0.0403971	0.681279	0.0123022	0.0160892	0.0267676	0.0270599
Scale 14	Guy	Protein geometry composite	FCIMLVWHYATGNSPQEDRK	2230	0.0819003	0.154966	0.577638	0.189776	0.705857	0.909864	0.0523851	0.695896	0.0131693	0.0154707	0.0258236	0.0281554
Scale 15	Eisenberg	Statistical composite scale	IFVLWMAGCYPTSHENQDKR	2230	0.0895546	0.161778	0.637353	0.200164	0.745796	0.987056	0.0371306	0.66559	0.00802824	0.0117549	0.0178157	0.0218439
Scale 16	Robson	Protein geometry	IWFCYLMVHPRQGTNEKASD	2224	0.106279	0.19267	0.640023	0.223328	0.802778	0.954165	0.0474562	0.633367	0.00785018	0.0110344	0.0160754	0.0196243
Scale 17	Cornette	statistical composite scale	FILVYMHCWQARETGSPNDK	2214	0.106279	0.19267	0.640023	0.223328	0.802778	0.954165	0.0474562	0.633367	0.00785018	0.0110344	0.0160754	0.0196243
Scale 18	Janin	Fraction of buried residues	CIVLFMGAWYSHTPDNEQRK	2214	0.121088	0.194117	0.679914	0.232699	0.788112	0.963617	0.0384298	0.589038	0.00849696	0.0118392	0.0185483	0.0198335
Scale 19	Fauche`re	Octanol/water partitioning	IFVLWMAGCYPTSHQNEDKR	2214	0.113351	0.19194	0.685079	0.230897	0.816479	0.915157	0.0284391	0.578474	0.00450343	0.00714343	0.00982668	0.0122585
Scale 20	Cornette	statistical composite scale	FILVMHYCWAQRTGESPNKD	2210	0.113491	0.201877	0.68237	0.244983	0.759698	0.973262	0.0330778	0.601592	0.00597597	0.00884337	0.0129707	0.0141166
Scale 21	Chothia	Proportion of residues buried in proteins	IVFCLMAGWTSPEHDYNQKR	2208	0.119395	0.203852	0.685066	0.249148	0.761732	0.978411	0.0352548	0.605776	0.00731422	0.0103912	0.0158282	0.0172341
Scale 22	Krigbaum	Residue solubility in proteins	CIMFWVYLATSHDGQENRPK	2206	0.149059	0.239056	0.800802	0.291244	0.786296	0.949027	0.0248237	0.561957	0.00582818	0.0100692	0.0124087	0.0139542
Scale 23	Cornette	statistical composite scale	LIVFMCYRWHAGSNETPQKD	2204	0.151401	0.247897	0.740313	0.303588	0.820476	0.904111	0.0215363	0.556046	0.00486588	0.00821809	0.0105896	0.0108108
Scale 24	Kyte	Combination of other scales and side chain data	IVLFCMAGTSWYPHDNEQKR	2198	0.144802	0.241023	0.754203	0.304657	0.825292	0.912933	0.0173261	0.536527	0.00668463	0.0107488	0.0130433	0.0146869
Scale 25	Chothia	Transfer energies of residue burial	IVFLMACGWSTEPHYDNQKR	2194	0.126632	0.214297	0.731051	0.295978	0.758058	0.97008	0.0137866	0.645091	0.00595662	0.0104257	0.012664	0.0122927
Scale 26	Cornette	statistical composite scale	LFIMVYCHWRAGQTESPNKD	2190	0.117142	0.198374	0.712789	0.285539	0.846345	0.874265	0.0121393	0.751521	0.00394845	0.00634834	0.0103421	0.00740505
Scale 27	Eisenberg	Solvent accessible surface area+solvation paramataters	WMFILYVPAHTCSGQKNEDR	2186	0.111207	0.198751	0.729308	0.298087	0.881156	0.817411	0.00922903	0.705699	0.00252889	0.00361627	0.00628441	0.0045095
Scale 28	Cornette	statistical composite scale	CIVLWFMYAGHTRSQNPEDK	2164	0.114181	0.186776	0.752934	0.287032	0.920281	0.764213	0.00940933	0.778116	0.00207279	0.00307401	0.00721639	0.00388937
Scale 29	Ponnuswamy	Hydrophobicity of surroundings	VCIMLFYWHAGTRQSPENDK	2164	0.0984357	0.170805	0.714812	0.242904	0.970912	0.729651	0.0126083	0.789378	0.00219105	0.00271495	0.00719144	0.0036243
Scale 30	Cornette	statistical composite scale	LVIFMCYRWHAGNSPTEQKD	2164	0.0912232	0.17313	0.738072	0.25091	0.946257	0.731925	0.011393	0.789631	0.00219043	0.00333805	0.00803013	0.00487461
Scale 31	Janin	Transfer energy of burial	CIVFLMWGASHTPYNDEQRK	2164	0.100776	0.209253	0.813897	0.294391	0.975991	0.650597	0.00752543	0.706921	0.00108901	0.00199341	0.00309416	0.00292809
Scale 32	Hopp	"antigenic determinants"	WFYILVMCAHTPGQNSRKDE	2160	0.0985312	0.193564	0.811855	0.28661	0.947644	0.632776	0.00587989	0.801392	0.00100442	0.00198802	0.00347019	0.00266002
Scale 33	Olsen	Preference for internality	IVMFLCAGTSPWEHDYNQKR	2146	0.148747	0.258031	0.910536	0.352756	0.851452	0.548895	0.00580619	0.697422	0.000983492	0.00206715	0.00351087	0.00232066
Scale 34	Cornette	statistical composite scale	LIFVMYCHWRAGSTQENPKD	2140	0.148747	0.258031	0.910536	0.352756	0.851452	0.548895	0.00580619	0.697422	0.000983492	0.00206715	0.00351087	0.00232066
Scale 35	Wertz	transfer energy from inside vs outside frequency	WCILVFHMYASRNGTEDPQK	2134	0.154495	0.271128	0.90145	0.377063	0.930779	0.609232	0.00661365	0.689486	0.00119387	0.00256099	0.00400696	0.00282616
Scale 36	Engelman	Theoretical based on alpha helices	FMILVCWATGSPYHQNEKDR	2102	0.140013	0.256723	0.916613	0.371678	0.930739	0.60044	0.00619195	0.64454	0.00115846	0.00236969	0.00304204	0.00279182
Scale 37	Aboderin	mobility on chromatography paper	LFIWMVYAPGTSREHQKDNC	2070	0.156811	0.265239	0.882911	0.375476	0.929251	0.588712	0.00636095	0.604986	0.00119461	0.00220135	0.00326661	0.00248314
Scale 38	Wertz	inside vs outside probability	FWCILMVHYASRNGTEDPQK	2060	0.162242	0.283513	0.952566	0.39333	0.907131	0.577437	0.00479558	0.596537	0.00120227	0.00216416	0.00297995	0.0020469
Scale 39	Meek	HPLC aa retention times	WIFLYPMVTSRNAKGHQCDE	2034	0.249864	0.378187	0.877321	0.498533	0.818714	0.487661	0.00524959	0.516027	0.00115187	0.00240233	0.00382059	0.00242807
Scale 40	Sanejouand	Density of non water atoms around residues	IWFLCVMYAHTGSPRQNDEK	2026	0.289181	0.446224	0.8406	0.559126	0.736978	0.394846	0.0047093	0.441214	0.000762237	0.00188015	0.00277669	0.001713
Scale 41	Rose	Reduction in protein area when aa is included	CFIVMLWHYAGTSRPNDEQK	1994	0.673892	0.75071	0.56008	0.822838	0.488969	0.222314	0.00562178	0.259796	0.00188669	0.00355826	0.00718572	0.0019581
Scale 42	Miyazawa	Contact energies from proteins geometry	FMILCWVYAHTGRSPQNEDK	1994	0.683429	0.749283	0.529287	0.822297	0.471431	0.203797	0.00608279	0.249253	0.00111256	0.0027199	0.00391093	0.00149972
Scale 43	Sweet	Optimal aa swaps based on mutation matrices	FYILMVWCTAPSRHGKQNED	1884	0.89298	0.999376	0.358037	0.994773	0.30223	0.112272	0.00558164	0.202857	0.0018289	0.00406355	0.00536372	0.00161508
S29 Ring interactions (Linear Regression P-val)					Charge state: 0				Charge state: -1				Charge state: 2
Scale ID	Name	Description	Order (hydrophobic->hydrophillic)	Trinquier score	AMP	CMP	GMP	UMP	AMP	CMP	GMP	UMP	AMP	CMP	GMP	UMP
Scale 1	Zimmerman	solubity data	LYFPIVKCMHRAEDTWSGNQ	2644	0.164123	0.200939	0.268292	0.321802	0.259001	0.143063	0.263885	0.249203	0.550594	0.421306	0.739344	0.676583		More significant correlation
Scale 2	Jones	Variant of zimmerman	WIFPYLVMKCHAREDGNSTQ	2530	0.141145	0.183044	0.286026	0.288184	0.362379	0.224957	0.215898	0.265067	0.245386	0.1639	0.645297	0.889588		Less significant correlation
Scale 3	Wolfenden	aqueos vs vapour phase distribution	GLIVAFCMTSWPYQKNEHDR	2434	0.0821554	0.113233	0.205107	0.182469	0.294952	0.194578	0.131545	0.193164	0.156962	0.131292	0.470801	0.974135
Scale 4	Bull	aa vs water surface tension	LIYFWVMQNGHRDAEKSCTP	2372	0.0477168	0.0702967	0.163094	0.110048	0.241753	0.148678	0.102327	0.12811	0.176498	0.128464	0.500436	0.857238
Scale 5	von Heijne	transfer energy in protein conformation changes and accessible surface area	FILVWAMGTSYQCNPHKEDR	2338	0.054581	0.0784346	0.150174	0.112461	0.20168	0.129016	0.128982	0.129756	0.190061	0.149129	0.515557	0.811048
Scale 6	Levitt	Ethanol/dioxane transfer energy	WFYLIVPMCHATGQNSDERK	2302	0.0320847	0.0449409	0.110731	0.0652482	0.169784	0.102763	0.106619	0.0842228	0.189528	0.158324	0.522323	0.758196
Scale 7	Frommel	Apolar accessible surface area	WFYMILPVHCKTRAEQSNGD	2280	0.0400834	0.05312	0.135695	0.0766951	0.173037	0.112901	0.101041	0.112903	0.188482	0.154123	0.494965	0.775731
Scale 8	Rekker	Assorted organic partitioning measures	WFILYVMPCRAKGDEHTSNQ	2280	0.0281117	0.0360217	0.11241	0.0527625	0.152055	0.08704	0.108598	0.0787685	0.221756	0.196293	0.554724	0.686815
Scale 9	Krigbaum	Residue solubility in proteins	WFIMYKCVLPATSHDGENQR	2276	0.0220675	0.0296838	0.104428	0.0427484	0.138799	0.0777035	0.0934435	0.0628528	0.24659	0.211037	0.600474	0.669525
Scale 10	Efremov	Protein geometry data	IFLCMVWYHAGTNRDQSPEK	2268	0.0265102	0.0324268	0.101447	0.0452424	0.181873	0.102158	0.0804304	0.0670503	0.190168	0.14364	0.55514	0.776472
Scale 11	Nishikawa	Number of contacting residues in proteins	CVILWMYFAHGRTQSEPNKD	2264	0.0247876	0.0330994	0.108153	0.0409209	0.19499	0.114834	0.0857705	0.0682961	0.133815	0.135805	0.371043	0.807357
Scale 12	Guy	Protein geometry data	FMCVLIWHYTAGNSPDEQKR	2240	0.0344883	0.04415	0.131481	0.0541273	0.197058	0.121669	0.0764403	0.0853494	0.143153	0.122027	0.411536	0.832495
Scale 13	Meirovitch	Distance of amino acids to protein cores	FIVWMLCHYARNTPGDSEQK	2234	0.0480052	0.0638408	0.165686	0.0783292	0.220128	0.141301	0.0628184	0.123248	0.143474	0.13123	0.36086	0.858389
Scale 14	Guy	Protein geometry composite	FCIMLVWHYATGNSPQEDRK	2230	0.0409535	0.0524487	0.142081	0.0606644	0.207134	0.125951	0.0776057	0.101475	0.157034	0.145163	0.374472	0.806659
Scale 15	Eisenberg	Statistical composite scale	IFVLWMAGCYPTSHENQDKR	2230	0.0423677	0.0543719	0.161562	0.0644443	0.22052	0.140663	0.0621747	0.108653	0.134964	0.143693	0.315662	0.82854
Scale 16	Robson	Protein geometry	IWFCYLMVHPRQGTNEKASD	2224	0.0538389	0.0668403	0.169448	0.075244	0.25324	0.166754	0.0761424	0.127751	0.116966	0.11564	0.288261	0.901487
Scale 17	Cornette	statistical composite scale	FILVYMHCWQARETGSPNDK	2214	0.0538389	0.0668403	0.169448	0.075244	0.25324	0.166754	0.0761424	0.127751	0.116966	0.11564	0.288261	0.901487
Scale 18	Janin	Fraction of buried residues	CIVLFMGAWYSHTPDNEQRK	2214	0.0518197	0.0628958	0.179815	0.0735117	0.251001	0.160265	0.0639177	0.130843	0.116787	0.120756	0.307097	0.900011
Scale 19	Fauche`re	Octanol/water partitioning	IFVLWMAGCYPTSHQNEDKR	2214	0.052104	0.0643127	0.186553	0.0749432	0.264156	0.176038	0.0508331	0.137452	0.0957494	0.11337	0.236527	0.946849
Scale 20	Cornette	statistical composite scale	FILVMHYCWAQRTGESPNKD	2210	0.0549356	0.0722811	0.181634	0.0808839	0.239634	0.166076	0.0594695	0.141752	0.109694	0.12834	0.272092	0.938705
Scale 21	Chothia	Proportion of residues buried in proteins	IVFCLMAGWTSPEHDYNQKR	2208	0.0570395	0.0734315	0.184493	0.0837646	0.242146	0.165594	0.0636944	0.143037	0.117547	0.134724	0.290105	0.920604
Scale 22	Krigbaum	Residue solubility in proteins	CIMFWVYLATSHDGQENRPK	2206	0.0702786	0.0862189	0.231557	0.0981293	0.259818	0.181525	0.0460361	0.164511	0.10783	0.135797	0.252202	0.943952
Scale 23	Cornette	statistical composite scale	LIVFMCYRWHAGSNETPQKD	2204	0.0720819	0.089688	0.214374	0.104862	0.283038	0.204214	0.0424552	0.177047	0.0932155	0.121093	0.231762	0.985143
Scale 24	Kyte	Combination of other scales and side chain data	IVLFCMAGTSWYPHDNEQKR	2198	0.0641095	0.0798742	0.222359	0.103285	0.285963	0.197314	0.0321967	0.173859	0.102848	0.111621	0.246246	0.969601
Scale 25	Chothia	Transfer energies of residue burial	IVFLMACGWSTEPHYDNQKR	2194	0.0548753	0.0702084	0.199585	0.0938797	0.252084	0.179183	0.0275364	0.152455	0.101358	0.117308	0.265366	0.989377
Scale 26	Cornette	statistical composite scale	LFIMVYCHWRAGQTESPNKD	2190	0.0498922	0.0621748	0.190467	0.0860532	0.300082	0.219686	0.0280538	0.134128	0.0685232	0.0826581	0.238426	0.865574
Scale 27	Eisenberg	Solvent accessible surface area+solvation paramataters	WMFILYVPAHTCSGQKNEDR	2186	0.0489785	0.0622329	0.202868	0.0919408	0.326453	0.253467	0.0242981	0.150144	0.054189	0.0704069	0.19228	0.778269
Scale 28	Cornette	statistical composite scale	CIVLWFMYAGHTRSQNPEDK	2164	0.0451809	0.056318	0.203818	0.0820732	0.348841	0.268305	0.0276424	0.131657	0.0420781	0.0581574	0.20018	0.716859
Scale 29	Ponnuswamy	Hydrophobicity of surroundings	VCIMLFYWHAGTRQSPENDK	2164	0.0404948	0.0510299	0.189483	0.0708392	0.364099	0.276715	0.0352683	0.11744	0.0432291	0.0604962	0.200942	0.721071
Scale 30	Cornette	statistical composite scale	LVIFMCYRWHAGNSPTEQKD	2164	0.0378325	0.0518552	0.196613	0.0741303	0.346376	0.267924	0.033905	0.117535	0.0469049	0.0670995	0.207399	0.768785
Scale 31	Janin	Transfer energy of burial	CIVFLMWGASHTPYNDEQRK	2164	0.0522802	0.0699878	0.250026	0.100617	0.410434	0.328836	0.0251658	0.155089	0.0347238	0.0650585	0.126165	0.706614
Scale 32	Hopp	"antigenic determinants"	WFYILVMCAHTPGQNSRKDE	2160	0.0491719	0.0648517	0.251131	0.0972172	0.438798	0.342708	0.0218124	0.142668	0.0300746	0.0629656	0.127451	0.666667
Scale 33	Olsen	Preference for internality	IVMFLCAGTSPWEHDYNQKR	2146	0.069804	0.0866593	0.31083	0.123124	0.519319	0.411485	0.0203279	0.18626	0.0237914	0.0430602	0.109744	0.593987
Scale 34	Cornette	statistical composite scale	LIFVMYCHWRAGSTQENPKD	2140	0.069804	0.0866593	0.31083	0.123124	0.519319	0.411485	0.0203279	0.18626	0.0237914	0.0430602	0.109744	0.593987
Scale 35	Wertz	transfer energy from inside vs outside frequency	WCILVFHMYASRNGTEDPQK	2134	0.0746387	0.0948754	0.300131	0.131564	0.468279	0.377821	0.0228469	0.195768	0.0278891	0.0509707	0.123226	0.622556
Scale 36	Engelman	Theoretical based on alpha helices	FMILVCWATGSPYHQNEKDR	2102	0.0700557	0.0916372	0.317283	0.138441	0.48147	0.388168	0.0221215	0.213209	0.0276828	0.0578773	0.108204	0.612969
Scale 37	Aboderin	mobility on chromatography paper	LFIWMVYAPGTSREHQKDNC	2070	0.0729278	0.09238	0.30081	0.136216	0.4811	0.39235	0.0231058	0.222774	0.0271702	0.0539999	0.114145	0.594866
Scale 38	Wertz	inside vs outside probability	FWCILMVHYASRNGTEDPQK	2060	0.0777293	0.1042	0.348304	0.15058	0.507941	0.423184	0.0182231	0.249624	0.0277143	0.0547916	0.103262	0.569581
Scale 39	Meek	HPLC aa retention times	WIFLYPMVTSRNAKGHQCDE	2034	0.11329	0.13949	0.454574	0.192747	0.595169	0.501332	0.0224582	0.306515	0.0204186	0.0470532	0.0945993	0.518123
Scale 40	Sanejouand	Density of non water atoms around residues	IWFLCVMYAHTGSPRQNDEK	2026	0.136813	0.177972	0.502949	0.238593	0.673691	0.604979	0.0233245	0.379865	0.016244	0.0456649	0.0714096	0.448358
Scale 41	Rose	Reduction in protein area when aa is included	CFIVMLWHYAGTSRPNDEQK	1994	0.288817	0.316427	0.785469	0.382477	0.989145	0.912306	0.0280633	0.613446	0.0106182	0.0282492	0.0676337	0.285937
Scale 42	Miyazawa	Contact energies from proteins geometry	FMILCWVYAHTGRSPQNEDK	1994	0.329201	0.368391	0.855441	0.428852	0.958138	0.957159	0.0309549	0.678267	0.00879105	0.0355332	0.0431261	0.260788
Scale 43	Sweet	Optimal aa swaps based on mutation matrices	FYILMVWCTAPSRHGKQNED	1884	0.510225	0.601635	0.857773	0.642765	0.687328	0.72899	0.0333219	0.909709	0.00839508	0.044071	0.027677	0.178362
S30 Whole molecule interactions (Slope of linear regression)					Charge state: 0				Charge state: -1				Charge state: 2
Scale ID	Name	Description	Order (hydrophobic->hydrophillic)	Trinquier score	AMP	CMP	GMP	UMP	AMP	CMP	GMP	UMP	AMP	CMP	GMP	UMP
Scale 1	Zimmerman	solubity data	LYFPIVKCMHRAEDTWSGNQ	2644	-0.208662	-0.149157	-0.144069	-0.107066	-0.188348	-0.15866	0.403686	-0.041127	0.29978	0.298027	0.156369	0.185167		Steeper hydrophobicity dependance
Scale 2	Jones	Variant of zimmerman	WIFPYLVMKCHAREDGNSTQ	2530	-0.246054	-0.156484	-0.132515	-0.131196	-0.0964731	-0.0499325	0.45092	0.0284197	0.655587	0.660525	0.524124	0.409621		Steeper hydrophillicity dependance
Scale 3	Wolfenden	aqueos vs vapour phase distribution	GLIVAFCMTSWPYQKNEHDR	2434	-0.284777	-0.183615	-0.169032	-0.170577	-0.100594	-0.0368771	0.520312	0.023195	0.82726	0.837798	0.689377	0.570377
Scale 4	Bull	aa vs water surface tension	LIYFWVMQNGHRDAEKSCTP	2372	-0.306782	-0.202528	-0.186427	-0.21155	-0.10122	-0.0441211	0.517487	0.0172676	0.82541	0.833908	0.674841	0.574787
Scale 5	von Heijne	transfer energy in protein conformation changes and accessible surface area	FILVWAMGTSYQCNPHKEDR	2338	-0.300286	-0.191483	-0.188813	-0.201491	-0.12046	-0.0596245	0.476485	0.0264767	0.814349	0.817265	0.668301	0.561771
Scale 6	Levitt	Ethanol/dioxane transfer energy	WFYLIVPMCHATGQNSDERK	2302	-0.309475	-0.208346	-0.212095	-0.231508	-0.1171	-0.0594992	0.473324	0.0158727	0.810978	0.824747	0.662465	0.571806
Scale 7	Frommel	Apolar accessible surface area	WFYMILPVHCKTRAEQSNGD	2280	-0.294333	-0.192948	-0.176912	-0.214397	-0.114886	-0.0518061	0.481457	0.0614168	0.822425	0.845352	0.681318	0.593583
Scale 8	Rekker	Assorted organic partitioning measures	WFILYVMPCRAKGDEHTSNQ	2280	-0.31159	-0.215596	-0.199211	-0.247448	-0.121896	-0.0648129	0.462768	0.0363039	0.792756	0.811359	0.654633	0.567214
Scale 9	Krigbaum	Residue solubility in proteins	WFIMYKCVLPATSHDGENQR	2276	-0.330877	-0.23186	-0.208267	-0.267929	-0.130702	-0.0773671	0.482467	0.0149476	0.789916	0.814238	0.64738	0.579973
Scale 10	Efremov	Protein geometry data	IFLCMVWYHAGTNRDQSPEK	2268	-0.314067	-0.22472	-0.222881	-0.261773	-0.100653	-0.0492985	0.507463	0.01807	0.829936	0.853575	0.668106	0.621234
Scale 11	Nishikawa	Number of contacting residues in proteins	CVILWMYFAHGRTQSEPNKD	2264	-0.326529	-0.227369	-0.216015	-0.274013	-0.0842614	-0.0225788	0.505828	0.0269461	0.945468	0.950545	0.783312	0.67893
Scale 12	Guy	Protein geometry data	FMCVLIWHYTAGNSPDEQKR	2240	-0.298487	-0.204354	-0.176288	-0.240798	-0.0876093	-0.0289814	0.507685	0.0436947	0.900513	0.909535	0.737533	0.661588
Scale 13	Meirovitch	Distance of amino acids to protein cores	FIVWMLCHYARNTPGDSEQK	2234	-0.282814	-0.188298	-0.149008	-0.220274	-0.0818422	-0.0205386	0.53223	0.0724197	0.910926	0.907297	0.763448	0.672843
Scale 14	Guy	Protein geometry composite	FCIMLVWHYATGNSPQEDRK	2230	-0.293778	-0.200157	-0.173164	-0.244338	-0.0810358	-0.0229777	0.502263	0.0682958	0.895281	0.903315	0.760446	0.662566
Scale 15	Eisenberg	Statistical composite scale	IFVLWMAGCYPTSHENQDKR	2230	-0.292627	-0.200755	-0.149515	-0.243432	-0.070937	-0.00335461	0.545016	0.076881	0.962945	0.950806	0.815783	0.700518
Scale 16	Robson	Protein geometry	IWFCYLMVHPRQGTNEKASD	2224	-0.264718	-0.177716	-0.140483	-0.219661	-0.0517896	0.0112549	0.493849	0.0803051	0.914044	0.906945	0.782879	0.673299
Scale 17	Cornette	statistical composite scale	FILVYMHCWQARETGSPNDK	2214	-0.264718	-0.177716	-0.140483	-0.219661	-0.0517896	0.0112549	0.493849	0.0803051	0.914044	0.906945	0.782879	0.673299
Scale 18	Janin	Fraction of buried residues	CIVLFMGAWYSHTPDNEQRK	2214	-0.255299	-0.177479	-0.124244	-0.215846	-0.0558206	0.00894795	0.514005	0.0910217	0.908233	0.901301	0.76984	0.673508
Scale 19	Fauche`re	Octanol/water partitioning	IFVLWMAGCYPTSHQNEDKR	2214	-0.25901	-0.17739	-0.121509	-0.215533	-0.0479672	0.0207878	0.537208	0.0931096	0.959762	0.946216	0.826516	0.711756
Scale 20	Cornette	statistical composite scale	FILVMHYCWAQRTGESPNKD	2210	-0.256553	-0.172102	-0.121488	-0.207509	-0.0626057	0.0064813	0.519666	0.0867437	0.926985	0.917407	0.793646	0.693546
Scale 21	Chothia	Proportion of residues buried in proteins	IVFCLMAGWTSPEHDYNQKR	2208	-0.249858	-0.169435	-0.119032	-0.203417	-0.0613534	0.00517322	0.508349	0.0847778	0.898701	0.891346	0.765786	0.66871
Scale 22	Krigbaum	Residue solubility in proteins	CIMFWVYLATSHDGQENRPK	2206	-0.24314	-0.164613	-0.0775011	-0.195293	-0.0573439	0.0127701	0.561276	0.0994387	0.959869	0.93464	0.824145	0.717471
Scale 23	Cornette	statistical composite scale	LIVFMCYRWHAGSNETPQKD	2204	-0.244918	-0.163741	-0.103034	-0.192956	-0.048626	0.0243675	0.580129	0.102218	0.988215	0.967163	0.849833	0.748485
Scale 24	Kyte	Combination of other scales and side chain data	IVLFCMAGTSWYPHDNEQKR	2198	-0.241789	-0.161442	-0.0946512	-0.187205	-0.0459902	0.021504	0.580806	0.104282	0.93292	0.913713	0.806781	0.702086
Scale 25	Chothia	Transfer energies of residue burial	IVFLMACGWSTEPHYDNQKR	2194	-0.248424	-0.167806	-0.102195	-0.1874	-0.063092	0.00725838	0.587949	0.0766496	0.927954	0.901958	0.796473	0.705549
Scale 26	Cornette	statistical composite scale	LFIMVYCHWRAGQTESPNKD	2190	-0.249818	-0.170408	-0.10746	-0.187939	-0.0390159	0.0300642	0.586173	0.0518389	0.945255	0.932116	0.800438	0.731782
Scale 27	Eisenberg	Solvent accessible surface area+solvation paramataters	WMFILYVPAHTCSGQKNEDR	2186	-0.248353	-0.166722	-0.0989362	-0.179454	-0.02948	0.0429308	0.591672	0.0604986	0.958886	0.959329	0.824767	0.750416
Scale 28	Cornette	statistical composite scale	CIVLWFMYAGHTRSQNPEDK	2164	-0.249546	-0.173178	-0.0911505	-0.185769	-0.019985	0.0564425	0.597846	0.0457502	0.985145	0.984121	0.823953	0.769467
Scale 29	Ponnuswamy	Hydrophobicity of surroundings	VCIMLFYWHAGTRQSPENDK	2164	-0.257183	-0.17727	-0.104554	-0.200748	-0.00719983	0.064262	0.572007	0.0428827	0.970062	0.982355	0.814866	0.765186
Scale 30	Cornette	statistical composite scale	LVIFMCYRWHAGNSPTEQKD	2164	-0.261967	-0.17608	-0.0955627	-0.197192	-0.0132873	0.0635989	0.577792	0.0427611	0.96852	0.965013	0.804582	0.744849
Scale 31	Janin	Transfer energy of burial	CIVFLMWGASHTPYNDEQRK	2164	-0.256713	-0.163984	-0.0677423	-0.181791	0.0059692	0.0844942	0.60763	0.060571	1.02107	1.0095	0.881895	0.781886
Scale 32	Hopp	"antigenic determinants"	WFYILVMCAHTPGQNSRKDE	2160	-0.251265	-0.1649	-0.0666374	-0.17963	0.0126699	0.0866853	0.605413	0.0394688	0.998243	0.982259	0.85009	0.766282
Scale 33	Olsen	Preference for internality	IVMFLCAGTSPWEHDYNQKR	2146	-0.222785	-0.14503	-0.0316263	-0.158038	0.0362869	0.109044	0.609004	0.0612129	1.00426	0.984185	0.853316	0.777813
Scale 34	Cornette	statistical composite scale	LIFVMYCHWRAGSTQENPKD	2140	-0.222785	-0.14503	-0.0316263	-0.158038	0.0362869	0.109044	0.609004	0.0612129	1.00426	0.984185	0.853316	0.777813
Scale 35	Wertz	transfer energy from inside vs outside frequency	WCILVFHMYASRNGTEDPQK	2134	-0.217088	-0.139467	-0.0344122	-0.148514	0.0166262	0.0919515	0.593923	0.0621023	0.979807	0.956596	0.833348	0.75667
Scale 36	Engelman	Theoretical based on alpha helices	FMILVCWATGSPYHQNEKDR	2102	-0.222966	-0.142596	-0.0288995	-0.149132	0.0165221	0.0935559	0.5936	0.0711618	0.974954	0.95558	0.846433	0.752211
Scale 37	Aboderin	mobility on chromatography paper	LFIWMVYAPGTSREHQKDNC	2070	-0.223015	-0.145749	-0.0422644	-0.153873	0.0175502	0.1004	0.61566	0.0828899	1.01183	0.999013	0.875187	0.789149
Scale 38	Wertz	inside vs outside probability	FWCILMVHYASRNGTEDPQK	2060	-0.222531	-0.141916	-0.0172477	-0.149829	0.0232908	0.104469	0.638257	0.085678	1.02166	1.01037	0.890491	0.808457
Scale 39	Meek	HPLC aa retention times	WIFLYPMVTSRNAKGHQCDE	2034	-0.189749	-0.120313	0.0459054	-0.122378	0.0469186	0.133169	0.64953	0.10761	1.05098	1.02869	0.895449	0.819181
Scale 40	Sanejouand	Density of non water atoms around residues	IWFLCVMYAHTGSPRQNDEK	2026	-0.183093	-0.108935	0.06245	-0.110508	0.0717388	0.169885	0.684978	0.132922	1.12499	1.09347	0.959385	0.877085
Scale 41	Rose	Reduction in protein area when aa is included	CFIVMLWHYAGTSRPNDEQK	1994	-0.0721431	-0.0447757	0.176216	-0.0416235	0.143798	0.235661	0.659529	0.188348	1.03944	1.01943	0.863963	0.850162
Scale 42	Miyazawa	Contact energies from proteins geometry	FMILCWVYAHTGRSPQNEDK	1994	-0.0696104	-0.0448398	0.189232	-0.0415667	0.148904	0.243845	0.65178	0.191553	1.0714	1.03668	0.909103	0.861953
Scale 43	Sweet	Optimal aa swaps based on mutation matrices	FYILMVWCTAPSRHGKQNED	1884	-0.0240274	-0.000114761	0.28665	0.00126656	0.220849	0.313825	0.685864	0.220037	1.08257	1.04779	0.923153	0.895337
S31 Whole molecule interactions (Slope of linear regression)					Charge state: 0				Charge state: -1				Charge state: 2
	Name	Description	Order	Trinquier score	AMP	CMP	GMP	UMP	AMP	CMP	GMP	UMP	AMP	CMP	GMP	UMP
Scale 1	Zimmerman	solubity data	LYFPIVKCMHRAEDTWSGNQ	2644	-0.443078	-0.349894	-0.518648	-0.367836	-0.332505	-0.379299	0.534829	-0.330157	0.228606	0.334718	-0.119025	-0.143459		Steeper hydrophobicity dependance
Scale 2	Jones	Variant of zimmerman	WIFPYLVMKCHAREDGNSTQ	2530	-0.471189	-0.366774	-0.504975	-0.396972	-0.272526	-0.32029	0.59515	-0.322595	0.442212	0.573377	0.165882	-0.0482847		Steeper hydrophillicity dependance
Scale 3	Wolfenden	aqueos vs vapour phase distribution	GLIVAFCMTSWPYQKNEHDR	2434	-0.523277	-0.410882	-0.567048	-0.469831	-0.297156	-0.324963	0.682914	-0.356205	0.50801	0.588803	0.246293	-0.0107399
Scale 4	Bull	aa vs water surface tension	LIYFWVMQNGHRDAEKSCTP	2372	-0.564564	-0.445615	-0.59605	-0.534319	-0.317491	-0.34519	0.705949	-0.396095	0.466871	0.569045	0.221093	-0.0571675
Scale 5	von Heijne	transfer energy in protein conformation changes and accessible surface area	FILVWAMGTSYQCNPHKEDR	2338	-0.53809	-0.425064	-0.600576	-0.519569	-0.337517	-0.353865	0.64538	-0.386023	0.443621	0.530199	0.208859	-0.0743124
Scale 6	Levitt	Ethanol/dioxane transfer energy	WFYLIVPMCHATGQNSDERK	2302	-0.558709	-0.450798	-0.623649	-0.562016	-0.341105	-0.356945	0.64431	-0.410875	0.419017	0.48983	0.193926	-0.0902285
Scale 7	Frommel	Apolar accessible surface area	WFYMILPVHCKTRAEQSNGD	2280	-0.541484	-0.43932	-0.589871	-0.54518	-0.340806	-0.349773	0.658094	-0.382245	0.42261	0.497647	0.207987	-0.0840423
Scale 8	Rekker	Assorted organic partitioning measures	WFILYVMPCRAKGDEHTSNQ	2280	-0.567008	-0.465942	-0.617171	-0.58384	-0.352823	-0.370624	0.63707	-0.415084	0.389192	0.448078	0.178124	-0.117329
Scale 9	Krigbaum	Residue solubility in proteins	WFIMYKCVLPATSHDGENQR	2276	-0.595029	-0.486964	-0.638181	-0.615311	-0.368493	-0.385885	0.672102	-0.442404	0.374583	0.439889	0.16011	-0.125739
Scale 10	Efremov	Protein geometry data	IFLCMVWYHAGTNRDQSPEK	2268	-0.590091	-0.489048	-0.655228	-0.62024	-0.340567	-0.366529	0.710873	-0.444308	0.428981	0.519398	0.183538	-0.0853285
Scale 11	Nishikawa	Number of contacting residues in proteins	CVILWMYFAHGRTQSEPNKD	2264	-0.589906	-0.482418	-0.637065	-0.62519	-0.327718	-0.350937	0.692554	-0.437957	0.482049	0.523674	0.273503	-0.0725544
Scale 12	Guy	Protein geometry data	FMCVLIWHYTAGNSPDEQKR	2240	-0.555269	-0.454848	-0.5955	-0.587754	-0.323392	-0.341885	0.705878	-0.41185	0.467323	0.536752	0.249332	-0.0623895
Scale 13	Meirovitch	Distance of amino acids to protein cores	FIVWMLCHYARNTPGDSEQK	2234	-0.529536	-0.427458	-0.556479	-0.548321	-0.311663	-0.329763	0.746171	-0.37642	0.472313	0.530775	0.279921	-0.0532449
Scale 14	Guy	Protein geometry composite	FCIMLVWHYATGNSPQEDRK	2230	-0.540193	-0.441056	-0.581848	-0.575298	-0.31724	-0.338975	0.704794	-0.394467	0.45355	0.508752	0.269741	-0.0723246
Scale 15	Eisenberg	Statistical composite scale	IFVLWMAGCYPTSHENQDKR	2230	-0.546876	-0.446026	-0.566745	-0.578437	-0.314244	-0.333264	0.754621	-0.39421	0.486299	0.519973	0.30939	-0.0652023
Scale 16	Robson	Protein geometry	IWFCYLMVHPRQGTNEKASD	2224	-0.494859	-0.404429	-0.527385	-0.529012	-0.278349	-0.29735	0.682929	-0.355768	0.481392	0.527229	0.309537	-0.03531
Scale 17	Cornette	statistical composite scale	FILVYMHCWQARETGSPNDK	2214	-0.494859	-0.404429	-0.527385	-0.529012	-0.278349	-0.29735	0.682929	-0.355768	0.481392	0.527229	0.309537	-0.03531
Scale 18	Janin	Fraction of buried residues	CIVLFMGAWYSHTPDNEQRK	2214	-0.4995	-0.41054	-0.516436	-0.532816	-0.280103	-0.302227	0.711674	-0.353721	0.482453	0.521382	0.2986	-0.0359045
Scale 19	Fauche`re	Octanol/water partitioning	IFVLWMAGCYPTSHQNEDKR	2214	-0.496401	-0.406474	-0.506354	-0.527712	-0.271356	-0.290338	0.742133	-0.346372	0.507416	0.528498	0.34245	-0.0189552
Scale 20	Cornette	statistical composite scale	FILVMHYCWAQRTGESPNKD	2210	-0.4867	-0.392403	-0.507087	-0.513486	-0.282575	-0.294079	0.712405	-0.33974	0.484334	0.504435	0.31575	-0.0216647
Scale 21	Chothia	Proportion of residues buried in proteins	IVFCLMAGWTSPEHDYNQKR	2208	-0.477487	-0.386524	-0.498219	-0.503307	-0.277929	-0.29104	0.694087	-0.334858	0.469271	0.491054	0.301073	-0.0277596
Scale 22	Krigbaum	Residue solubility in proteins	CIMFWVYLATSHDGQENRPK	2206	-0.477004	-0.388594	-0.471668	-0.50494	-0.280205	-0.293665	0.774178	-0.333164	0.502784	0.511816	0.339537	-0.0204619
Scale 23	Cornette	statistical composite scale	LIVFMCYRWHAGSNETPQKD	2204	-0.480312	-0.389642	-0.494942	-0.502192	-0.270834	-0.283355	0.795817	-0.328206	0.529748	0.537278	0.35849	0.00548946
Scale 24	Kyte	Combination of other scales and side chain data	IVLFCMAGTSWYPHDNEQKR	2198	-0.479347	-0.389895	-0.473317	-0.490322	-0.261784	-0.279542	0.811241	-0.32134	0.501658	0.535094	0.338398	-0.0109221
Scale 25	Chothia	Transfer energies of residue burial	IVFLMACGWSTEPHYDNQKR	2194	-0.487168	-0.395305	-0.488337	-0.494925	-0.275719	-0.285931	0.817961	-0.331659	0.49551	0.518828	0.320289	-0.00375419
Scale 26	Cornette	statistical composite scale	LFIMVYCHWRAGQTESPNKD	2190	-0.487546	-0.398745	-0.489	-0.497035	-0.245886	-0.257734	0.80105	-0.34001	0.536047	0.559983	0.332212	0.0468586
Scale 27	Eisenberg	Solvent accessible surface area+solvation paramataters	WMFILYVPAHTCSGQKNEDR	2186	-0.479087	-0.390355	-0.466366	-0.478539	-0.228369	-0.235516	0.801413	-0.320636	0.551619	0.569433	0.358091	0.0762583
Scale 28	Cornette	statistical composite scale	CIVLWFMYAGHTRSQNPEDK	2164	-0.492532	-0.403574	-0.471263	-0.498573	-0.22104	-0.231432	0.795974	-0.339102	0.586039	0.600932	0.356542	0.0993691
Scale 29	Ponnuswamy	Hydrophobicity of surroundings	VCIMLFYWHAGTRQSPENDK	2164	-0.4967	-0.406923	-0.480301	-0.510295	-0.211875	-0.224965	0.756815	-0.347226	0.576552	0.589224	0.351922	0.0967199
Scale 30	Cornette	statistical composite scale	LVIFMCYRWHAGNSPTEQKD	2164	-0.501833	-0.404991	-0.472292	-0.504187	-0.219263	-0.228607	0.760572	-0.346583	0.566985	0.575255	0.346615	0.0795572
Scale 31	Janin	Transfer energy of burial	CIVFLMWGASHTPYNDEQRK	2164	-0.475666	-0.382528	-0.425509	-0.469813	-0.193458	-0.203572	0.801725	-0.318789	0.601707	0.58274	0.418362	0.102411
Scale 32	Hopp	"antigenic determinants"	WFYILVMCAHTPGQNSRKDE	2160	-0.468305	-0.378479	-0.413022	-0.461302	-0.17723	-0.192591	0.79617	-0.319151	0.599168	0.570935	0.405715	0.11393
Scale 33	Olsen	Preference for internality	IVMFLCAGTSPWEHDYNQKR	2146	-0.437426	-0.355352	-0.368083	-0.433269	-0.148624	-0.168066	0.807806	-0.29086	0.623713	0.618369	0.426243	0.141457
Scale 34	Cornette	statistical composite scale	LIFVMYCHWRAGSTQENPKD	2140	-0.437426	-0.355352	-0.368083	-0.433269	-0.148624	-0.168066	0.807806	-0.29086	0.623713	0.618369	0.426243	0.141457
Scale 35	Wertz	transfer energy from inside vs outside frequency	WCILVFHMYASRNGTEDPQK	2134	-0.425318	-0.342778	-0.371301	-0.419048	-0.164889	-0.177915	0.784677	-0.281404	0.601421	0.591453	0.406698	0.129051
Scale 36	Engelman	Theoretical based on alpha helices	FMILVCWATGSPYHQNEKDR	2102	-0.4286	-0.343538	-0.356313	-0.409396	-0.159017	-0.172985	0.782894	-0.269416	0.597993	0.572605	0.419666	0.131687
Scale 37	Aboderin	mobility on chromatography paper	LFIWMVYAPGTSREHQKDNC	2070	-0.441603	-0.356473	-0.382931	-0.427958	-0.165488	-0.17833	0.809052	-0.274643	0.623584	0.603871	0.429722	0.143899
Scale 38	Wertz	inside vs outside probability	FWCILMVHYASRNGTEDPQK	2060	-0.439466	-0.348631	-0.351625	-0.418001	-0.15722	-0.168897	0.844351	-0.262601	0.627994	0.608202	0.446596	0.155338
Scale 39	Meek	HPLC aa retention times	WIFLYPMVTSRNAKGHQCDE	2034	-0.408377	-0.327496	-0.289033	-0.390723	-0.129765	-0.145891	0.841844	-0.240303	0.673437	0.642791	0.469126	0.180848
Scale 40	Sanejouand	Density of non water atoms around residues	IWFLCVMYAHTGSPRQNDEK	2026	-0.402455	-0.31351	-0.270849	-0.370929	-0.107572	-0.11754	0.874478	-0.21642	0.724887	0.675108	0.524879	0.221059
Scale 41	Rose	Reduction in protein area when aa is included	CFIVMLWHYAGTSRPNDEQK	1994	-0.28533	-0.23091	-0.108292	-0.271474	-0.00340953	-0.0245793	0.832342	-0.122757	0.745896	0.716471	0.519832	0.301817
Scale 42	Miyazawa	Contact energies from proteins geometry	FMILCWVYAHTGRSPQNEDK	1994	-0.26198	-0.207007	-0.072201	-0.24534	0.0130953	-0.0119376	0.816011	-0.100484	0.757861	0.687416	0.566494	0.316054
Scale 43	Sweet	Optimal aa swaps based on mutation matrices	FYILMVWCTAPSRHGKQNED	1884	-0.186014	-0.126439	0.074142	-0.151087	0.104565	0.080229	0.841729	-0.0287453	0.794929	0.690935	0.636753	0.391627

## Sheet: NMR data
S32 Inferred binding constant (KD) (M^-1)	Phe	"-"	"+"	Asp	"-"	"+"	Gly	"-"	"+"	Arg	"-"	"+"
AMP 2'	4.19282	1.88607	1.14555	0.339587	0.212002	1.1715	0.897096	0.834023	0.592733	0.535811	0.248898	0.228069
AMP 8'	2.76584	1.18072	8.79029	0.285764	0.223917	1.10755	0.000130726	0.000109671	0.000744969	10.9232	10.3164	9.40136
CMP 5'	3.88733	2.14328	12.5943	1.00451	0.489574	0.46874	0.0709725	0.0697662	0.103121	3.30047	2.06463	7.00436
CMP 6'	3.6819	2.11402	15.4536	0.2005	0.134097	0.229925	0.0220423	0.0123061	0.0147399	6.61061	5.26868	14.1687
GMP 8'	0.89196	0.52341	0.28134	0.949778	0.260728	0.425134	0.00634568	0.00587469	0.0128032	3.04103	2.60458	4.29925
UMP 8'	0.922605	0.20514	0.105587	0.0401101	0.0386788	0.143458	0.20631	0.0598365	0.105569	5.18341	3.40543	10.2951
Proportion of fits ranking proton as Xth choice binding partner
S33 Phenylalanine rank preference	AMP 2'	AMP 8'	CMP 5'	CMP 6'	GMP 8'	UMP 8'
1	0	0	0	0	0.3979	0.6021
2	0	0	0	0	0.6021	0.3979		Green = Anticodonic middle base
3	0.0028	0.4982	0.0652	0.4338	0	0		Red = Codonic middle base
4	0.041	0.34	0.2019	0.4171	0	0
5	0.2883	0.0551	0.5788	0.0778	0	0
6	0.6679	0.1067	0.1541	0.0713	0	0
S34 Aspartate rank preference	AMP 2'	AMP 8'	CMP 5'	CMP 6'	GMP 8'	UMP 8'
1	0.2052	0.0263	0	0.0059	0	0.7626
2	0.6266	0.0599	0.003	0.1285	0.0111	0.1709
3	0.0686	0	0.0341	0.6737	0.1614	0.0622
4	0.0575	0.0003	0.1528	0.1438	0.6413	0.0043
5	0.0387	0.0573	0.6825	0.0448	0.1767	0
6	0.0034	0.8562	0.1276	0.0033	0.0095	0
S35 Glycine rank preference	AMP 2'	AMP 8'	CMP 5'	CMP 6'	GMP 8'	UMP 8'
1	0	0.9815	0	0	0.0185	0
2	0	0.0185	0.0377	0.0172	0.9266	0
3	0	0	0.1248	0.8214	0.0538	0
4	0.0727	0	0.7489	0.1614	0.0011	0.0159
5	0.0714	0	0.0858	0	0	0.8428
6	0.8559	0	0.0028	0	0	0.1413
S36 Arginine rank preference	AMP 2'	AMP 8'	CMP 5'	CMP 6'	GMP 8'	UMP 8'
1	0.1372	0.0001	0.8517	0.0028	0.0034	0.0048
2	0.3556	0.0107	0.141	0.2552	0.0777	0.1598
3	0.1709	0.0344	0.007	0.4207	0.0998	0.2672
4	0.2018	0.082	0.0003	0.2494	0.1477	0.3188
5	0.1141	0.2391	0	0.0663	0.4076	0.1729
6	0.0204	0.6337	0	0.0056	0.2638	0.0765
